# Supplementary material for: Synthesis, Antibacterial and Antiribosomal Activity of the 3C-Aminoalkyl Modification in the Ribofuranosyl Ring of Apralogs (5-O-Ribofuranosyl Apramycins)
Source: MDPI journal article supplement (doi:10.3390/antibiotics12010025), 2022-12-24

## Supporting Information for

### **3-C-Aminoalkyl Modification in the Ribofuranosyl Ring of Apralogs (5-*O*-Ribofuranosyl Apramycins) for Enhanced Antibacterial Activity**

Dmitrijs Lubriks,<sup>a</sup> Klara Haldimann,<sup>b</sup> Sven N. Hobbie,<sup>b</sup> Andrea Vasella,<sup>c</sup> Erik C. Böttger,<sup>b,\*</sup> Edgars Suna,<sup>a,\*</sup> and David Crich<sup>d,e,f,\*</sup>

- a) Latvian Institute of Organic Synthesis, Riga, Latvia, LV-1006
- b) Institute of Medical Microbiology, University of Zurich, Gloriastrasse 30, 8006 Zürich, Switzerland
- c) Organic Chemistry Laboratory, ETH Zürich, Vladimir-Prelog-Weg 1-5/10, 8093 Zürich, Switzerland
- d) Department of Pharmaceutical and Biomedical Sciences, University of Georgia, 250 West Green Street, Athens, GA 30602, USA
- e) Complex Carbohydrate Research Center, University of Georgia, 315 Riverbend Road, Athens, GA 30602, USA
- f) Department of Chemistry, University of Georgia, 302 East Campus Road, Athens, GA 30602, USA

## Table of Contents

|                                                                                                                                                                                                                                                                                            | Spectra                                                                     |
|--------------------------------------------------------------------------------------------------------------------------------------------------------------------------------------------------------------------------------------------------------------------------------------------|-----------------------------------------------------------------------------|
| 5-Azido-5-deoxy-1,2- <i>O</i> -isopropylidene- $\alpha$ -D-xylofuranose ( <b>8</b> )                                                                                                                                                                                                       | S3                                                                          |
| 5-Azido-5-deoxy-1,2- <i>O</i> -isopropylidene- $\alpha$ -D- <i>erythro</i> -pentofuranos-3-ulose ( <b>9</b> )                                                                                                                                                                              | S4                                                                          |
| 2-(5-Bromopentyloxy)-tetrahydro-2H-pyran ( <b>10</b> )                                                                                                                                                                                                                                     | S5                                                                          |
| 5-Azido-5-deoxy-1,2- <i>O</i> -isopropylidene-3- <i>C</i> -(6-(5-((tetrahydro-2H-pyran-2-yl)oxy)pentyl)- $\alpha$ -D-ribofuranose ( <b>12</b> )                                                                                                                                            | S6                                                                          |
| (5-Azido-5-deoxy-1,2- <i>O</i> -isopropylidene-3- <i>C</i> -(6-(5-((tetrahydro-2H-pyran-2-yl)oxy)pentyl)-3- <i>O</i> -benzoyl- $\alpha$ -D-ribofuranose ( <b>13</b> )                                                                                                                      | S11                                                                         |
| 5-Azido-5-deoxy-1,2- <i>O</i> -isopropylidene-3- <i>C</i> -(5-hydroxypentyl)-3- <i>O</i> -benzoyl- $\alpha$ -D-ribofuranose ( <b>14</b> )                                                                                                                                                  | S16                                                                         |
| 5-Azido-5-deoxy-1,2- <i>O</i> -isopropylidene-3- <i>C</i> -(5-oxopentyl)-3- <i>O</i> -benzoyl- $\alpha$ -D-ribofuranose ( <b>15</b> )                                                                                                                                                      | S21                                                                         |
| 5-Azido-5-deoxy-1,2- <i>O</i> -isopropylidene-3- <i>C</i> -(5-(dimethylamino)pentyl)-3- <i>O</i> -benzoyl- $\alpha$ -D-ribofuranose ( <b>16</b> )                                                                                                                                          | S26                                                                         |
| 1,2-Di- <i>O</i> -acetyl-5-azido-5-deoxy-3- <i>C</i> -(5-(dimethylamino)pentyl)-3- <i>O</i> -benzoyl- $\alpha/\beta$ -D-ribofuranose ( <b>17</b> )                                                                                                                                         | S31                                                                         |
| 5- <i>O</i> -[5'''-Azido-5'''-deoxy-2'''- <i>O</i> -acetyl-3- <i>C</i> -(5-(dimethylamino)pentyl)-3- <i>O</i> -benzoyl- $\alpha/\beta$ -D-ribofuranosyl]-6,2'',3'',6''-tetra- <i>O</i> -benzoyl-1,3,2',4''-tetraazido-1,3,2',4''-tetra(desamino)-6',7'-oxazolidino-apramycin ( <b>19</b> ) | S33 ( <b>19<math>\alpha</math></b> )<br>S38 ( <b>19<math>\beta</math></b> ) |
| 5- <i>O</i> -[5'''-Amino-5'''-deoxy-3- <i>C</i> -(5-(dimethylamino)pentyl)- $\alpha$ -D-ribofuranosyl]-apramycin hepta hexa acetate ( <b>5</b> )                                                                                                                                           | S43                                                                         |
| 5- <i>O</i> -[5'''-Amino-5'''-deoxy-3- <i>C</i> -(5-(dimethylamino)pentyl)- $\beta$ -D-ribofuranosyl]-apramycin hepta hexa acetate ( <b>6</b> )                                                                                                                                            | S49                                                                         |

**5-Azido-5-deoxy-1,2-*O*-isopropylidene- $\alpha$ -D-xilofuranose (8)**

[ $^1\text{H}$  NMR, 400 MHz,  $\text{CDCl}_3$ ]

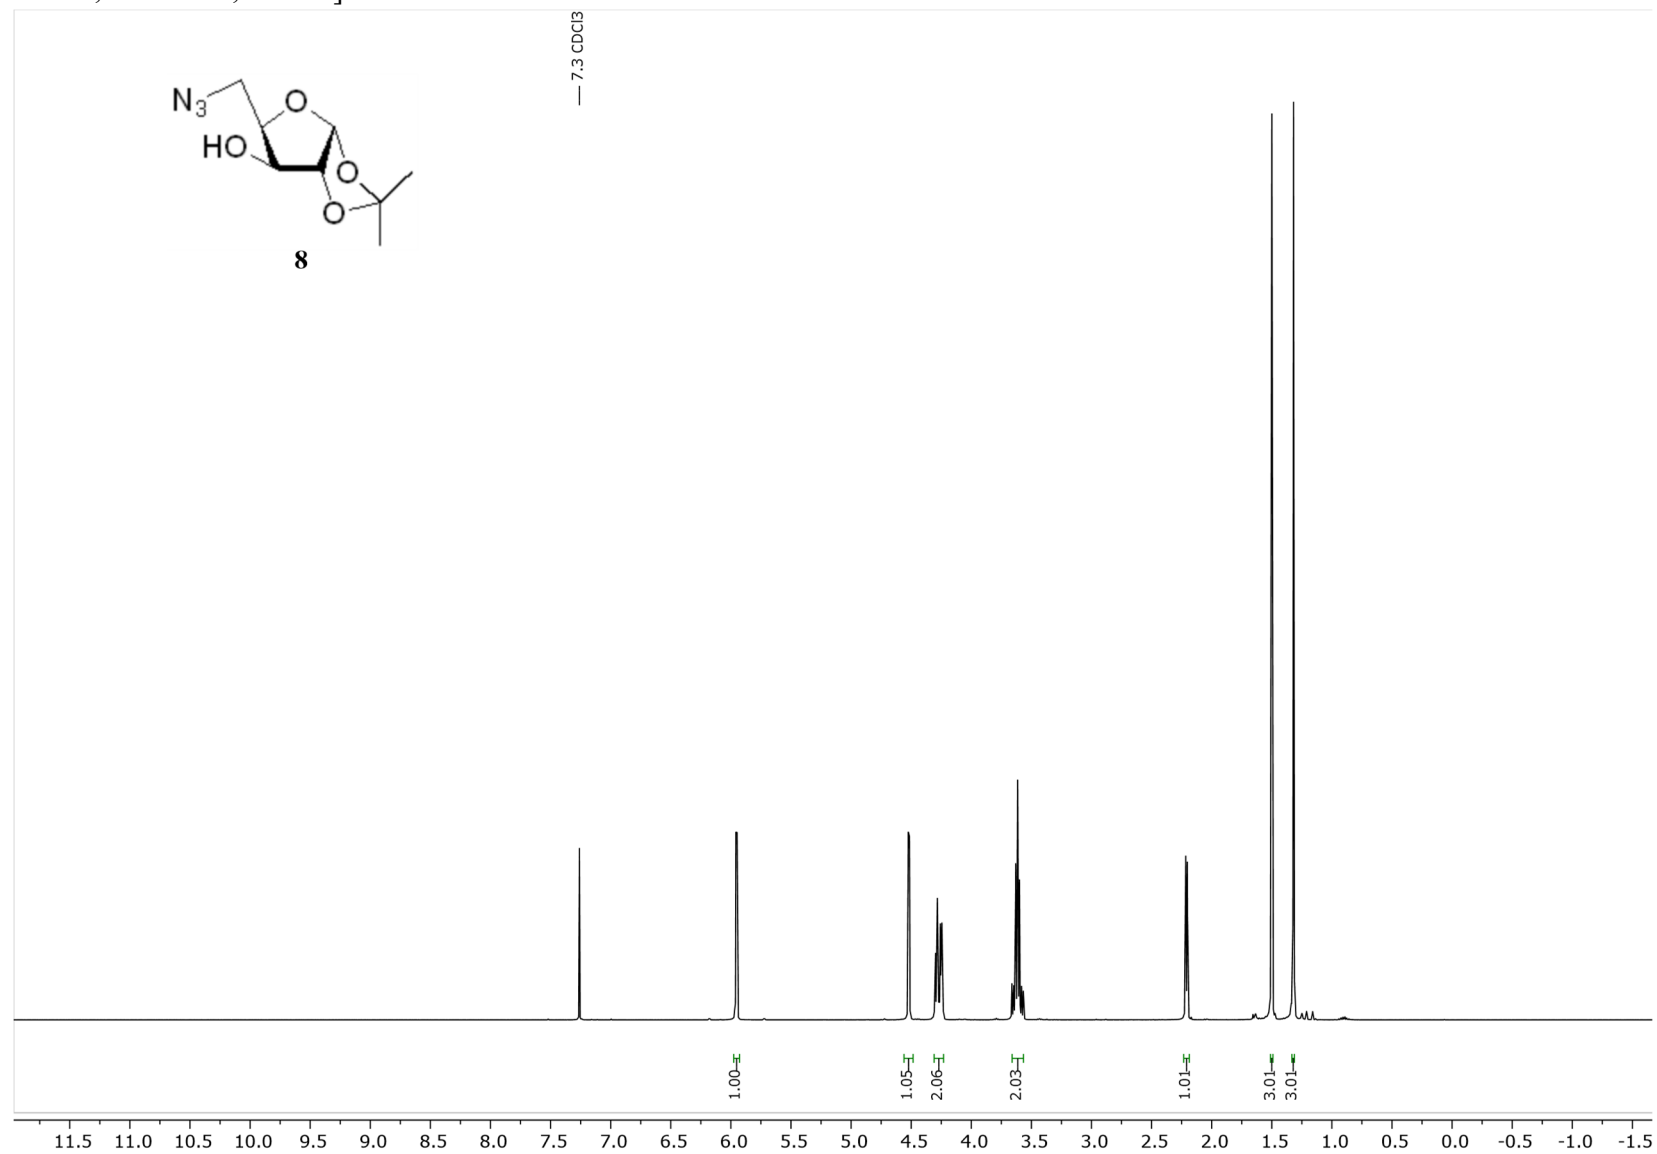

**5-Azido-5-deoxy-1,2-*O*-isopropylidene- $\alpha$ -D-*erythro*-pentofuranos-3-ulose (9)**

[ $^1\text{H}$  NMR, 400 MHz,  $\text{CDCl}_3$ ]

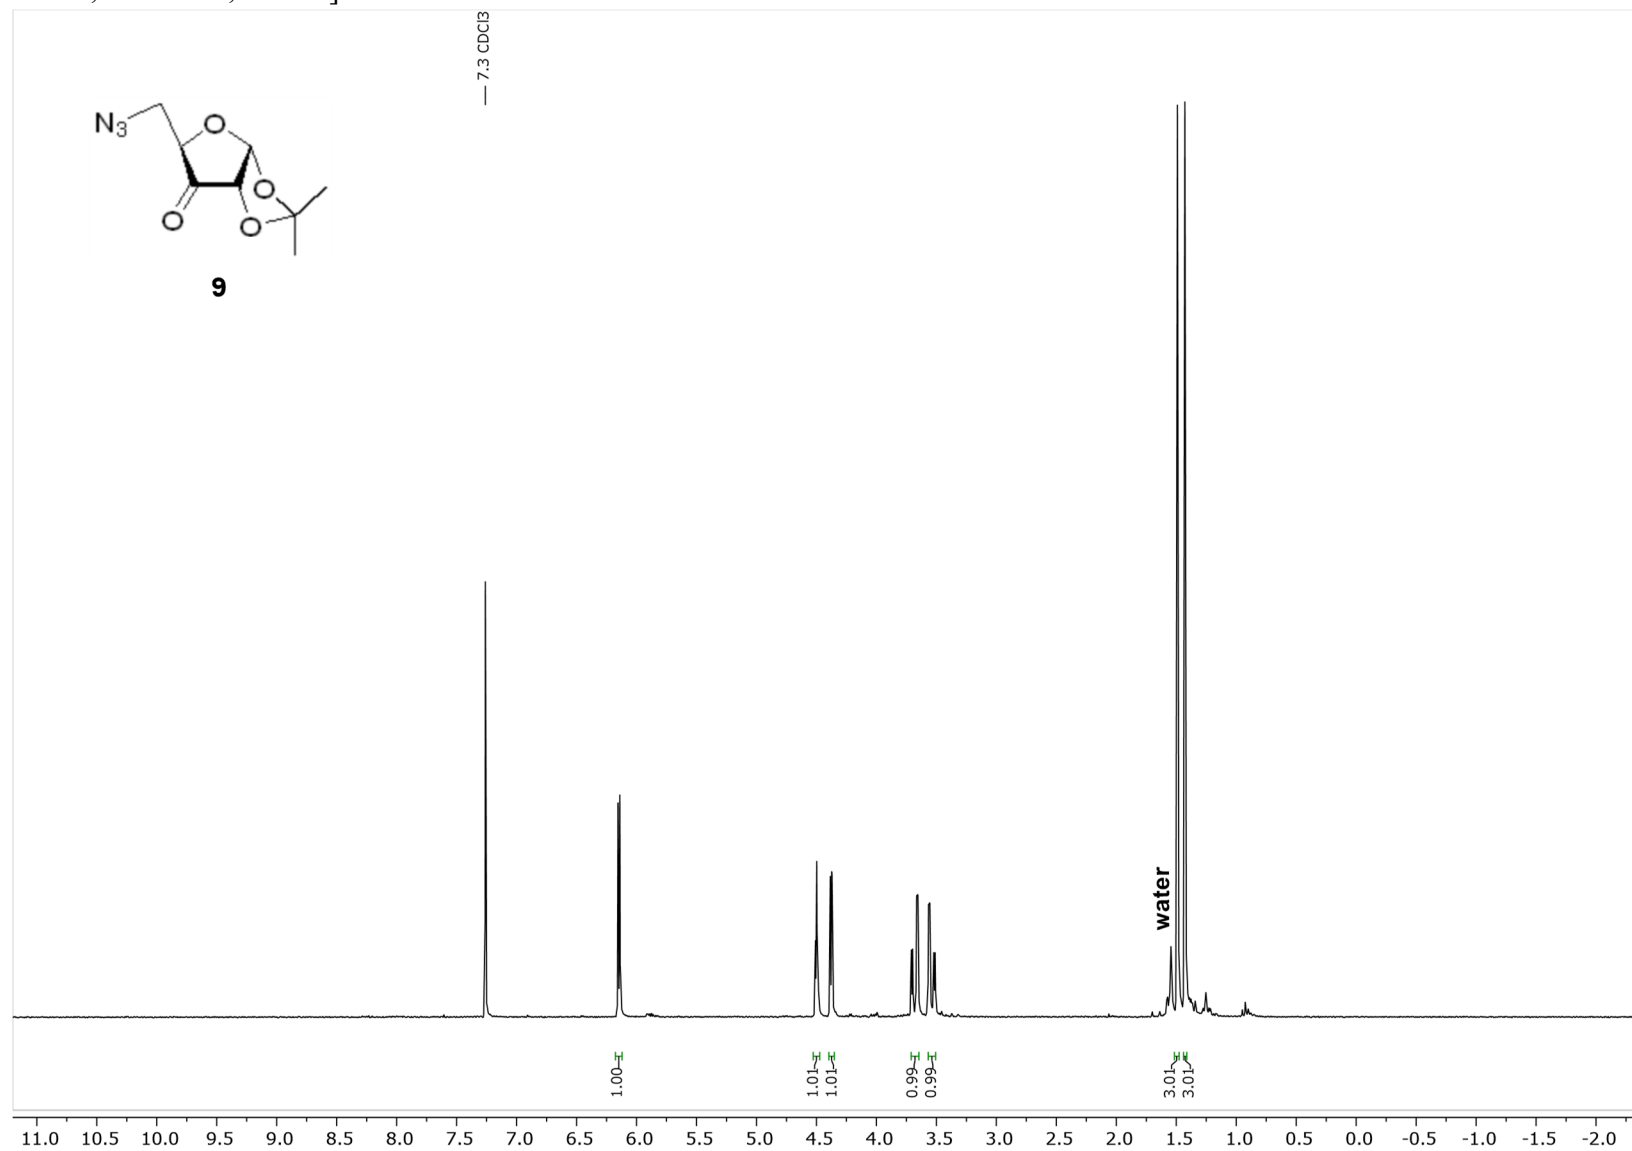



**2-(5-Bromopentyloxy)-tetrahydro-2H-pyran (10)**

[<sup>1</sup>H NMR, 400 MHz, CDCl<sub>3</sub>]

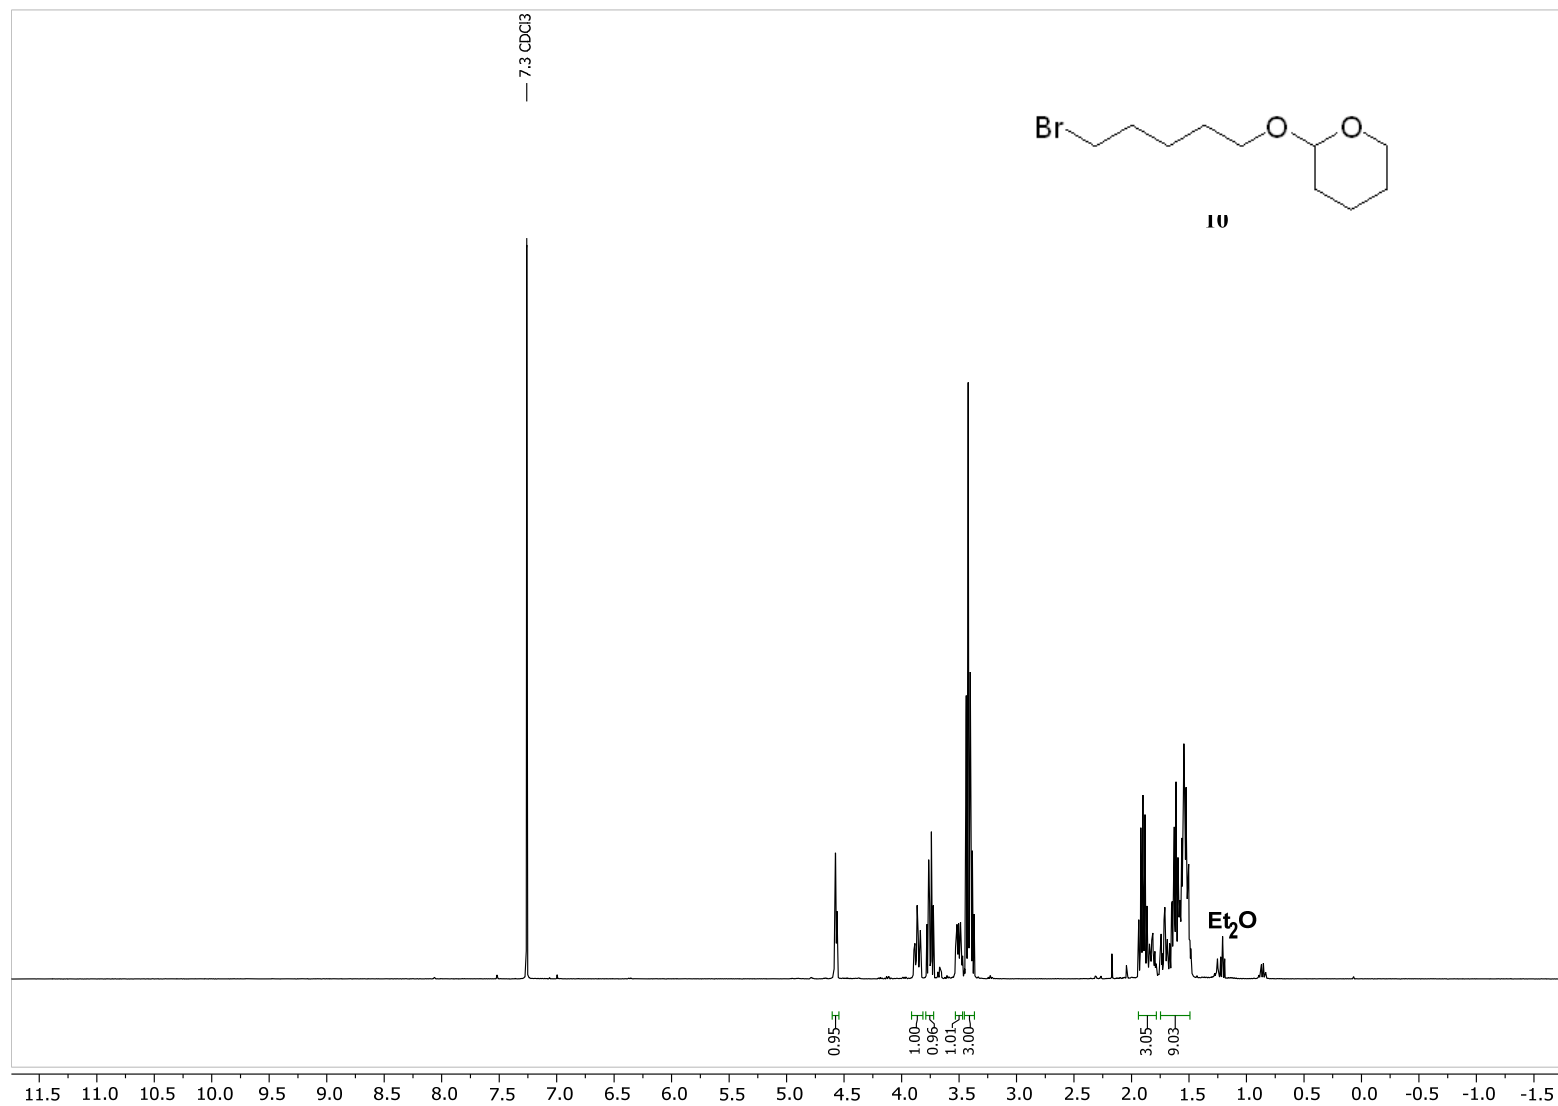

**5-Azido-5-deoxy-1,2-*O*-isopropylidene-3-*C*-(6-(5-(((tetrahydro-2H-pyran-2-yl)oxy)pentyl)- $\alpha$ -D-ribofuranose (12)**

[ $^1\text{H}$  NMR, 400 MHz,  $\text{CDCl}_3$ ]

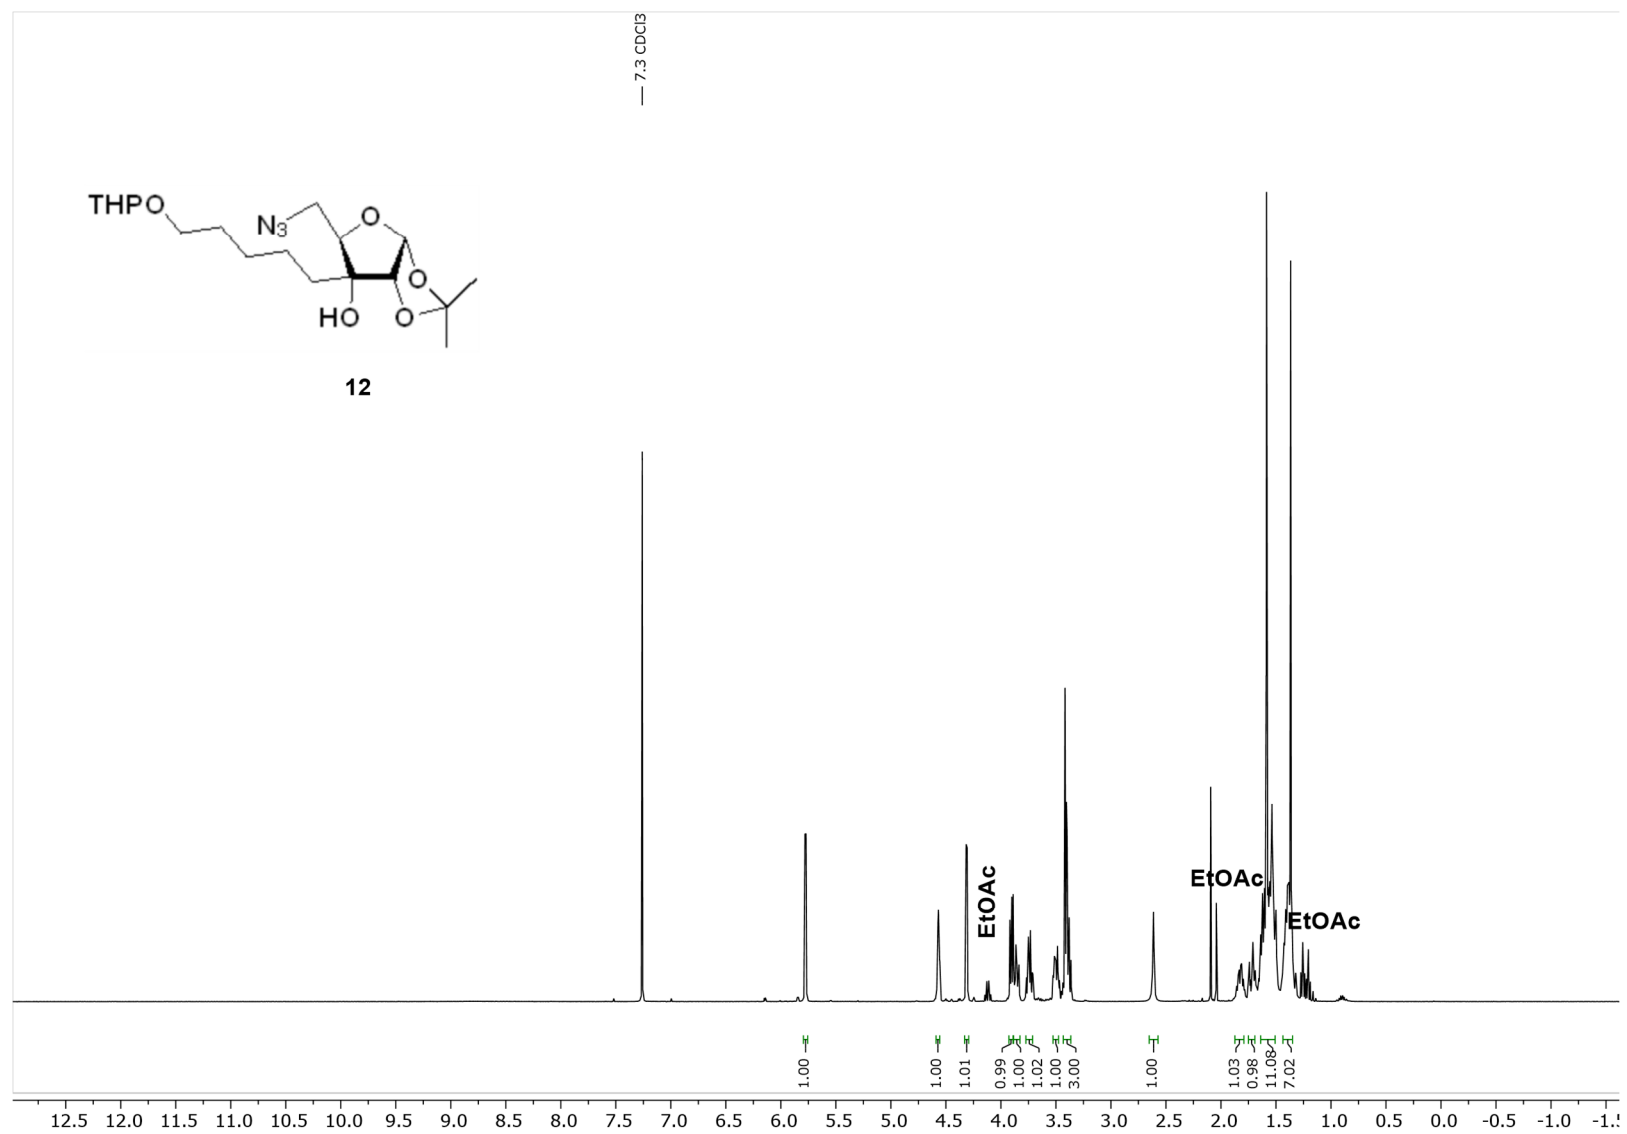

**5-Azido-5-deoxy-1,2-*O*-isopropylidene-3-*C*-(6-(5-(((tetrahydro-2H-pyran-2-yl)oxy)pentyl)- $\alpha$ -D-ribofuranose (12)**

[ $^{13}\text{C}$  NMR, 101 MHz,  $\text{CDCl}_3$ ]

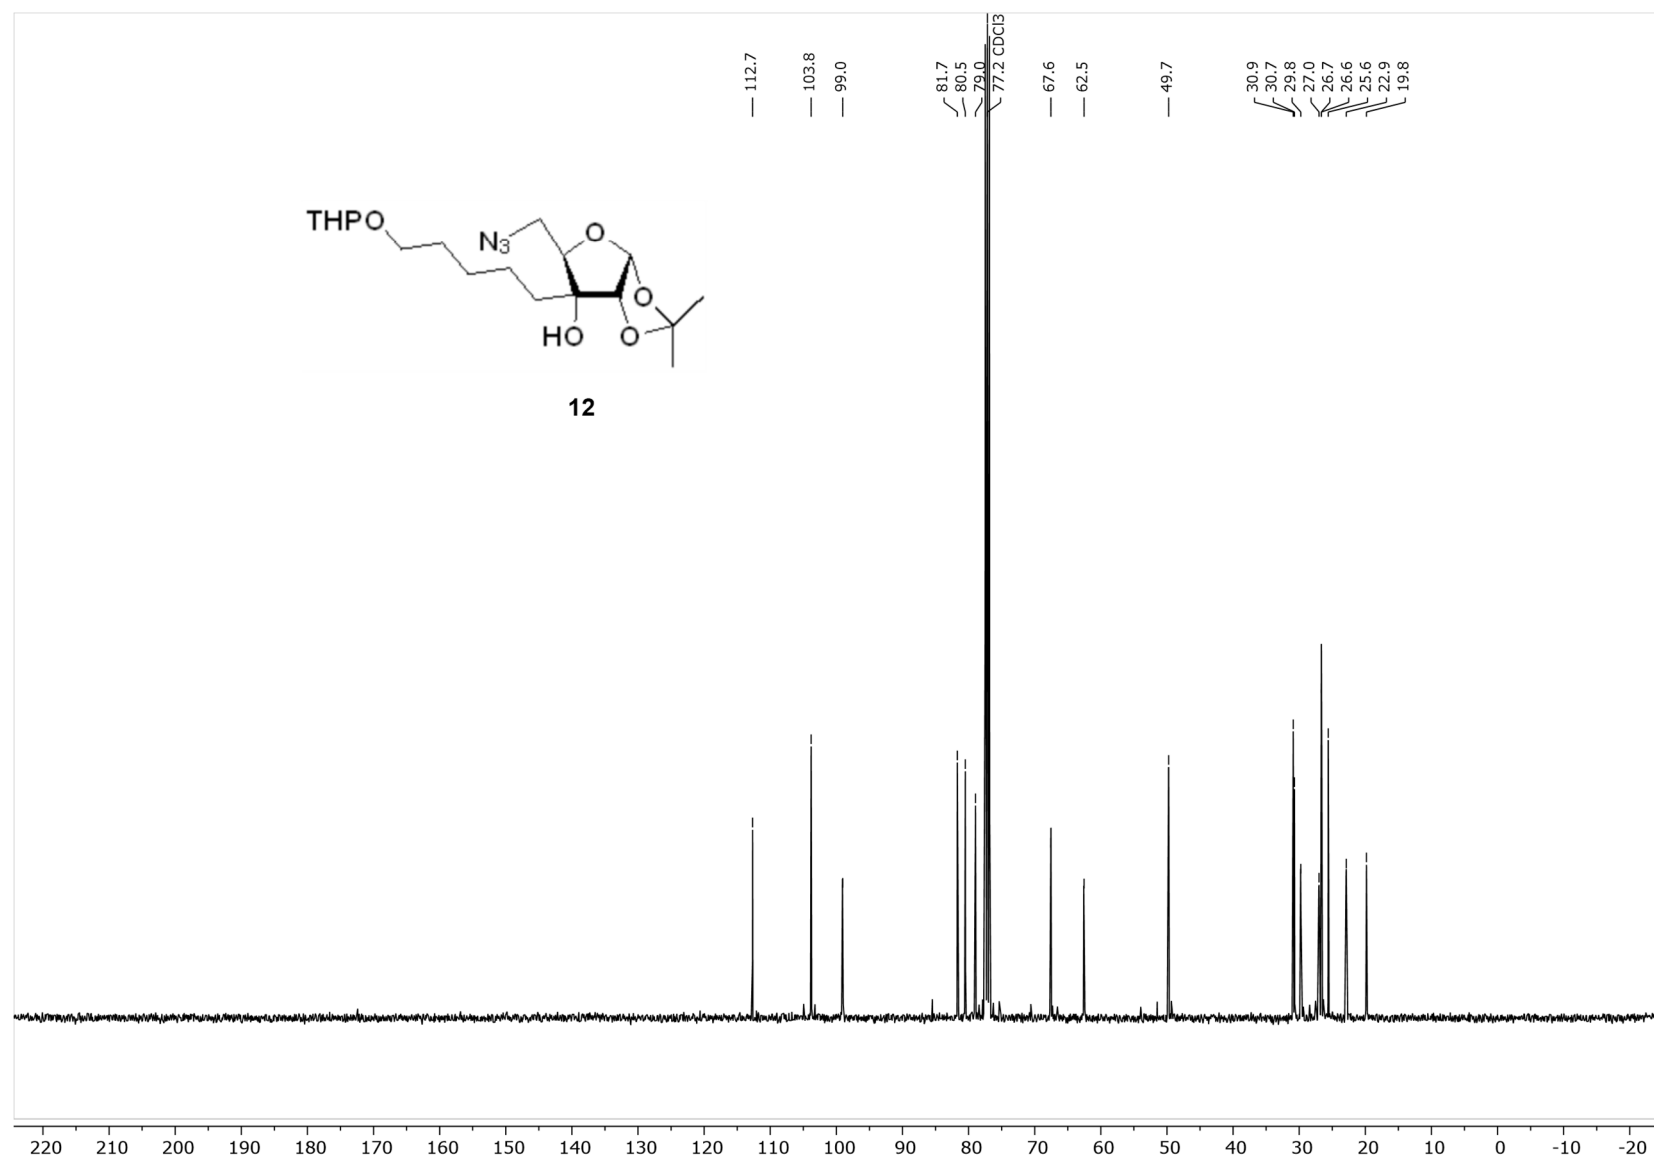

**5-Azido-5-deoxy-1,2-*O*-isopropylidene-3-*C*-(6-(5-(((tetrahydro-2H-pyran-2-yl)oxy)pentyl)- $\alpha$ -D-ribofuranose (12)**

[HSQC, 400 MHz, CDCl<sub>3</sub>]

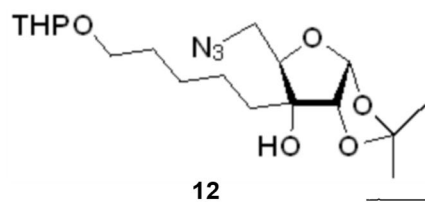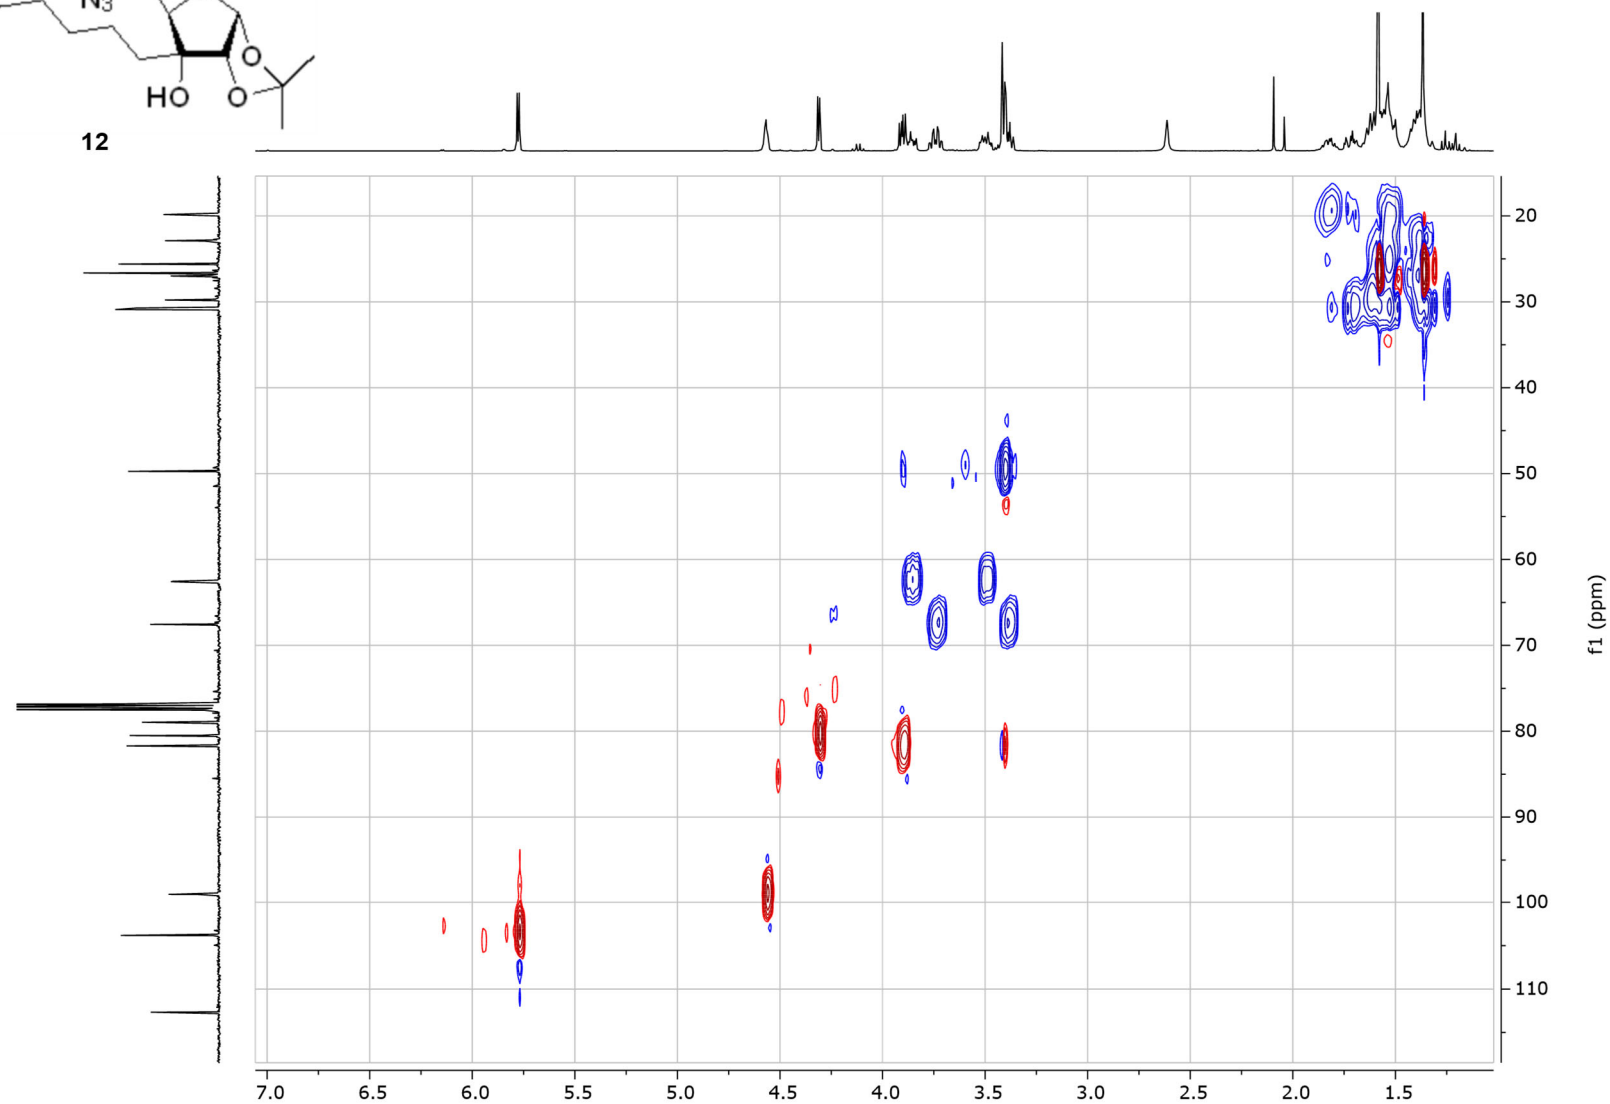

**5-Azido-5-deoxy-1,2-*O*-isopropylidene-3-*C*-(6-(5-(((tetrahydro-2H-pyran-2-yl)oxy)pentyl)- $\alpha$ -D-ribofuranose (12)**

[HMBC, 400 MHz, CDCl<sub>3</sub>]

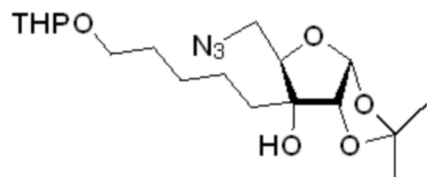

12

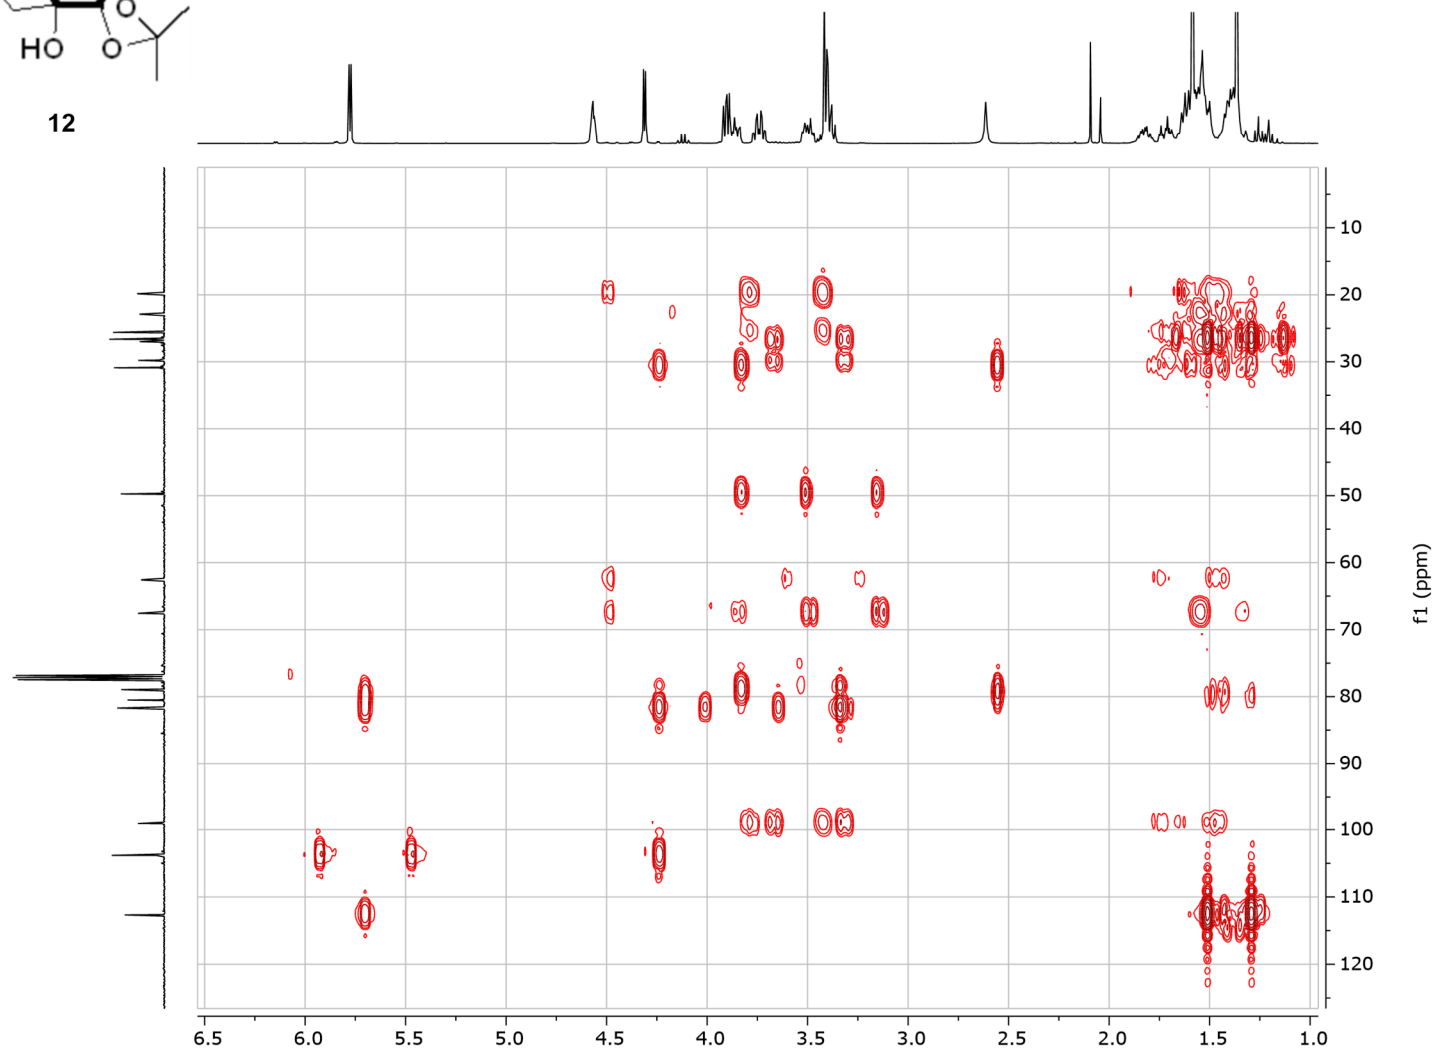

**5-Azido-5-deoxy-1,2-*O*-isopropylidene-3-*C*-(6-(5-(((tetrahydro-2H-pyran-2-yl)oxy)pentyl)- $\alpha$ -D-ribofuranose (12)**

[COSY, 400 MHz, CDCl<sub>3</sub>]

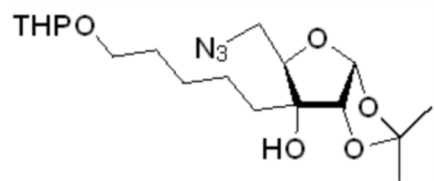

12

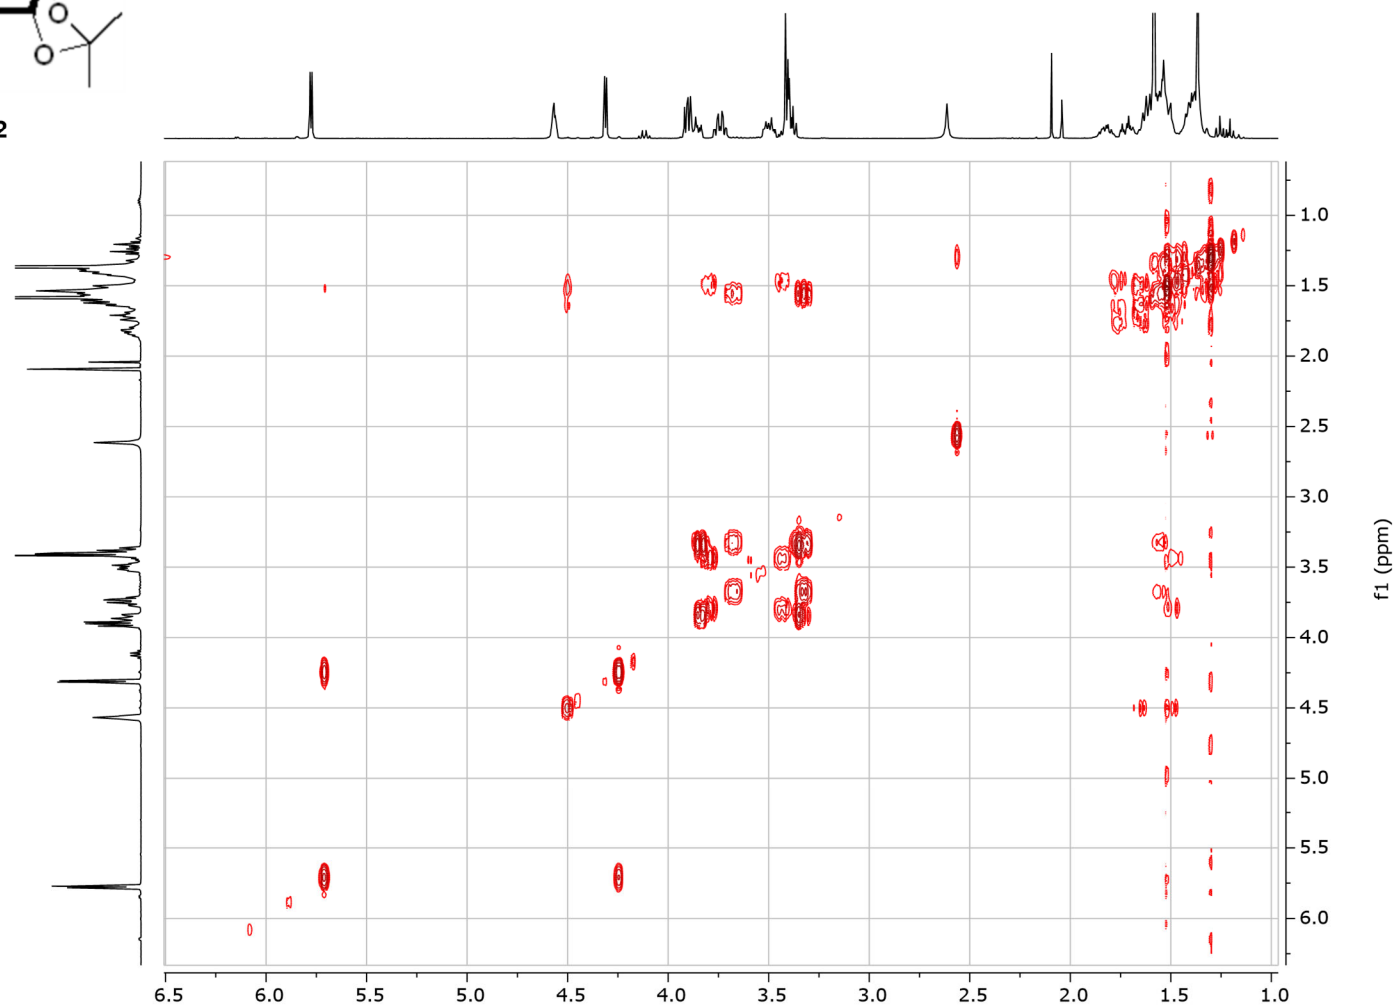

**5-Azido-5-deoxy-1,2-*O*-isopropylidene-3-*C*-(6-(5-((tetrahydro-2H-pyran-2-yl)oxy)pentyl)-3-*O*-benzoyl- $\alpha$ -D-ribofuranose (13)**  
 $^1\text{H}$  NMR, 400 MHz,  $\text{CDCl}_3$

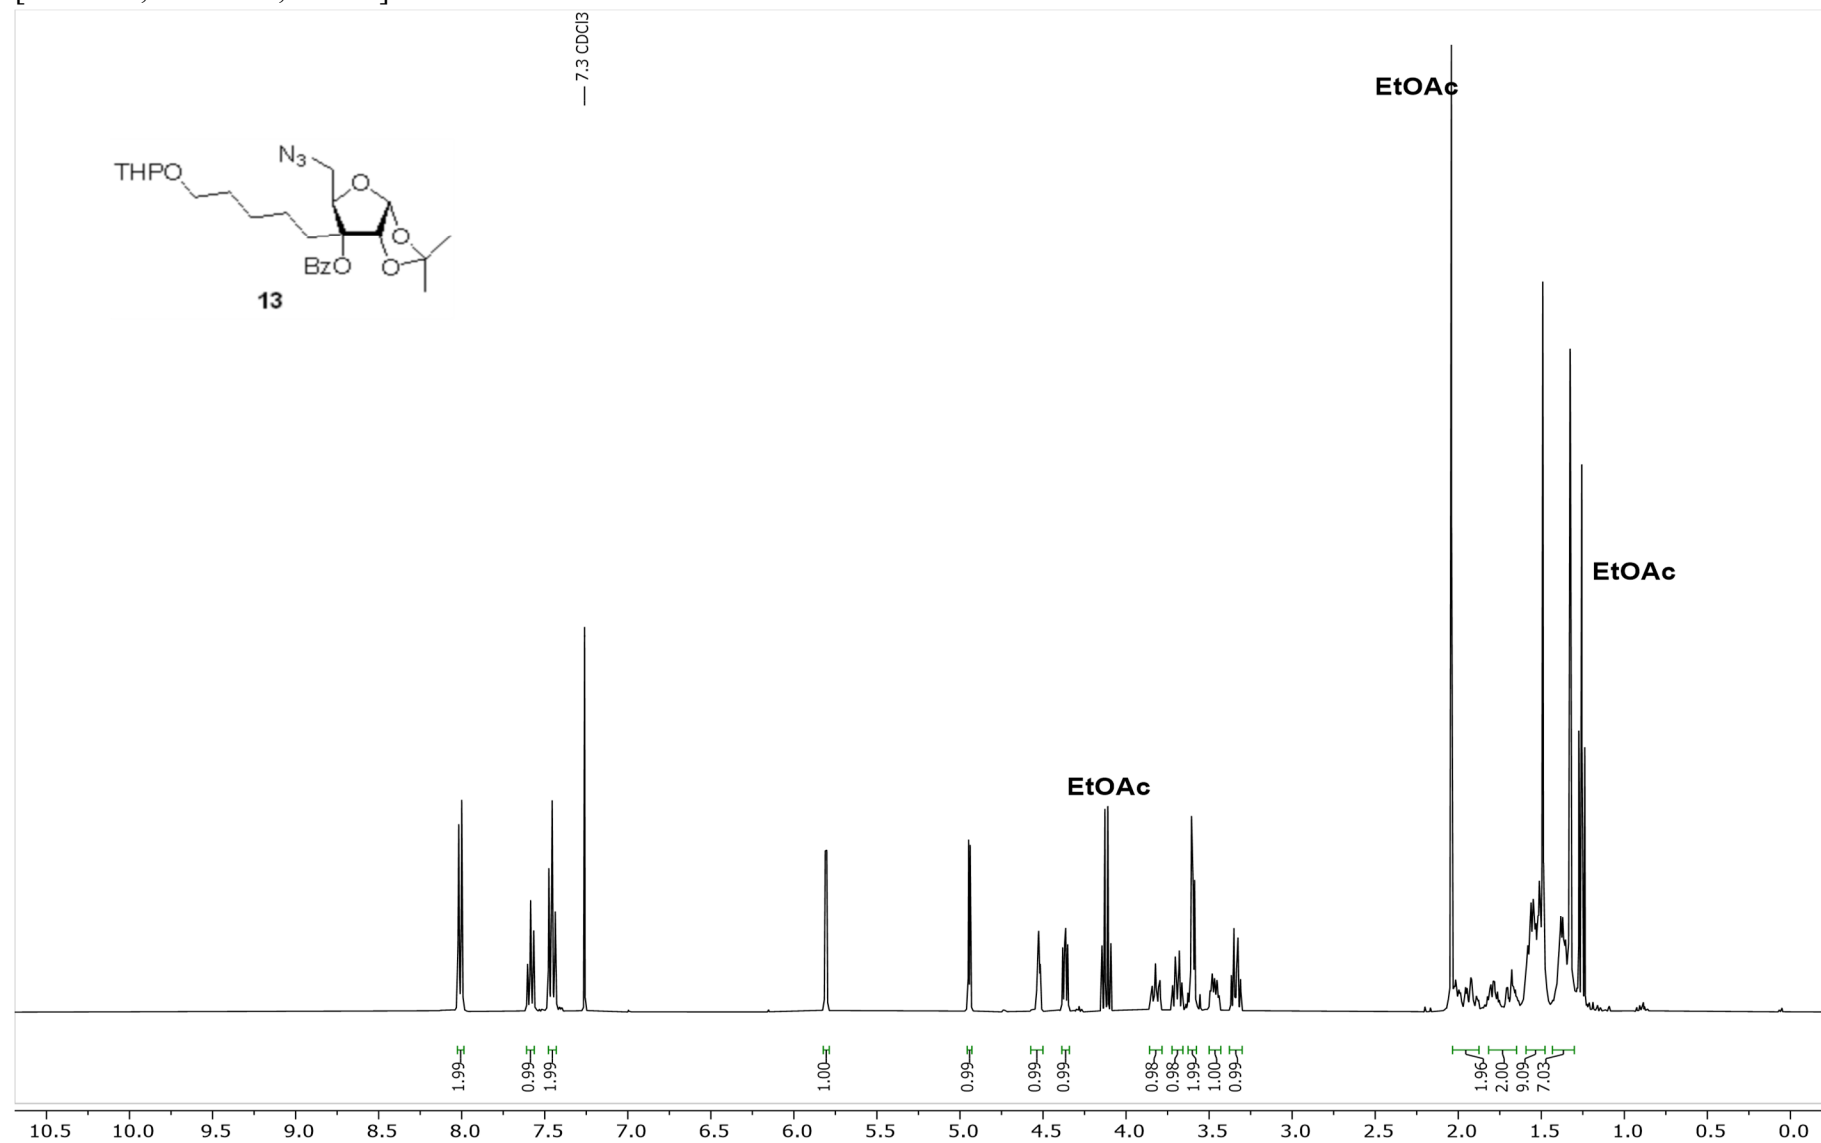

**5-Azido-5-deoxy-1,2-*O*-isopropylidene-3-*C*-(6-(5-(((tetrahydro-2H-pyran-2-yl)oxy)pentyl)-3-*O*-benzoyl- $\alpha$ -D-ribofuranose (13)**  
<sup>13</sup>C NMR, 101 MHz, CDCl<sub>3</sub>]

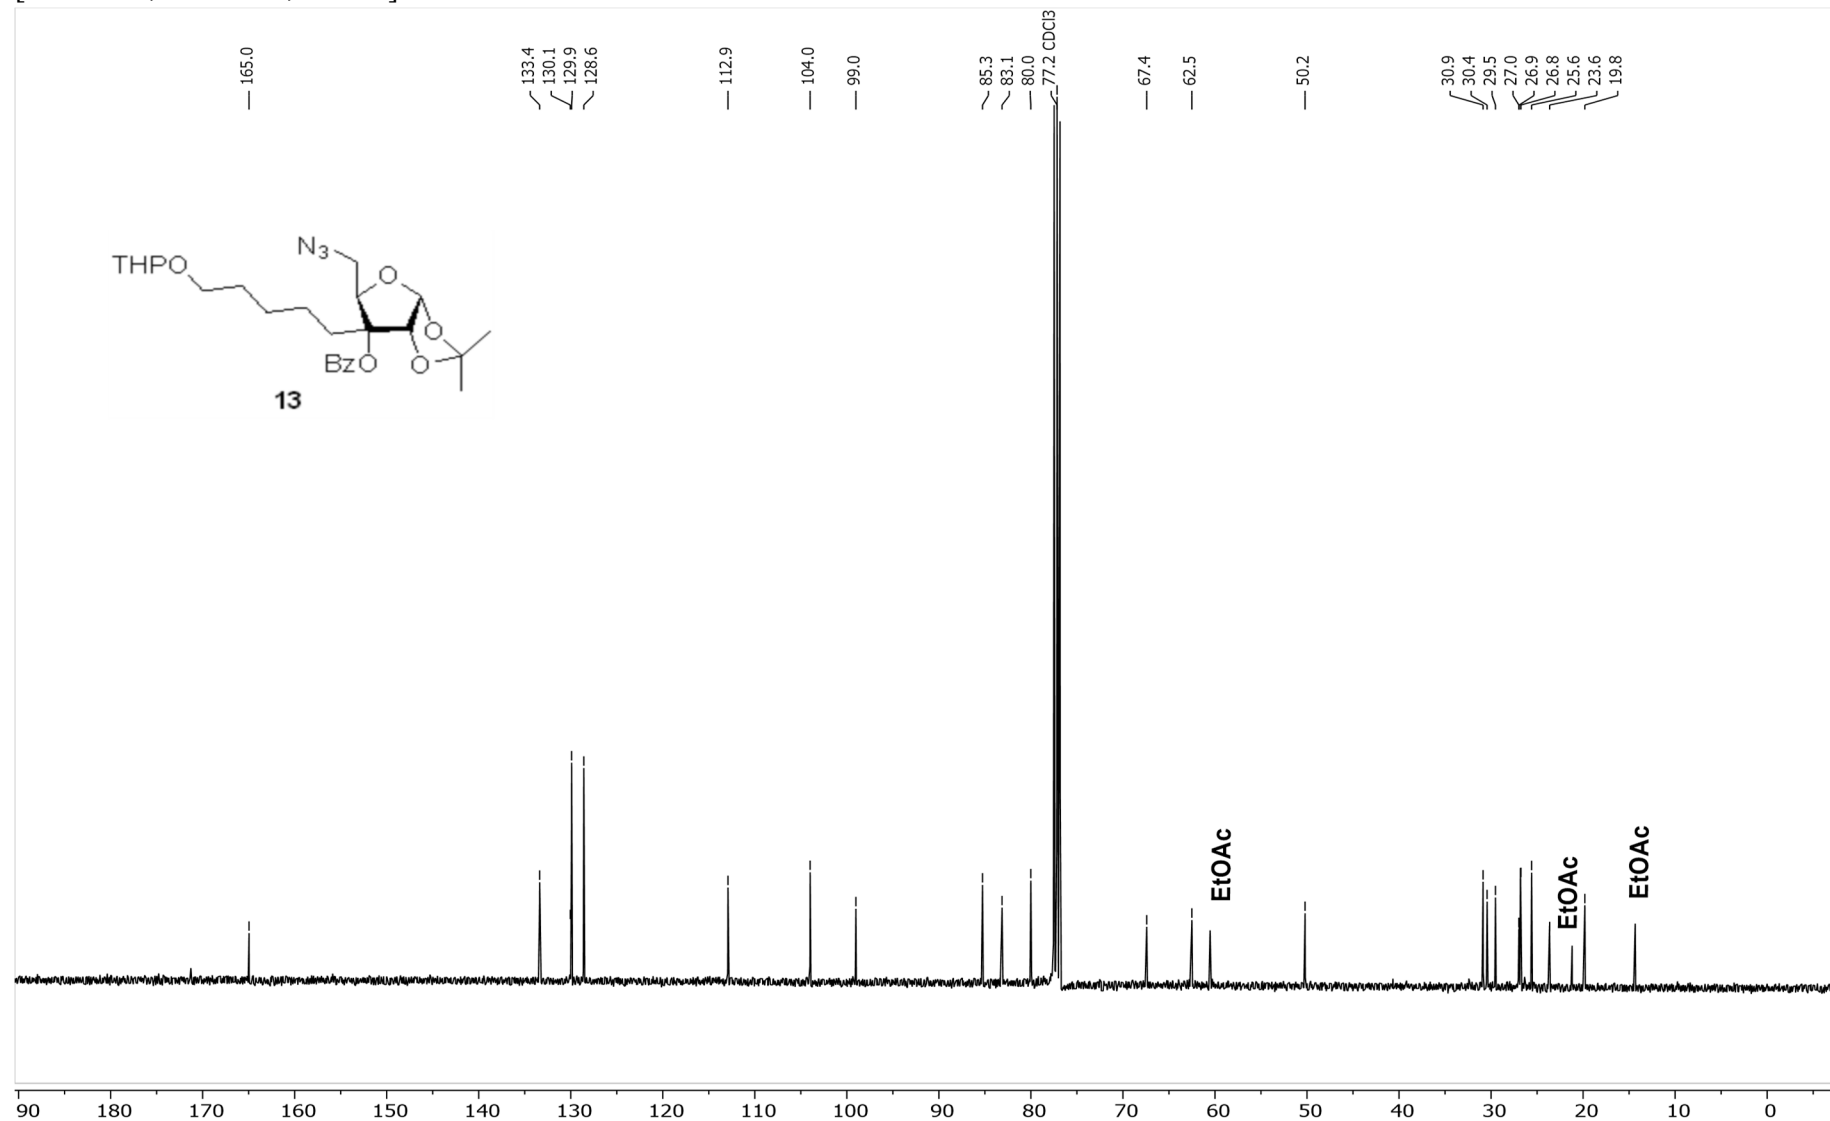



**5-Azido-5-deoxy-1,2-*O*-isopropylidene-3-*C*-(6-(5-(((tetrahydro-2H-pyran-2-yl)oxy)pentyl)-3-*O*-benzoyl- $\alpha$ -D-ribofuranose (13)**  
 [HSQC, 400 MHz, CDCl<sub>3</sub>]

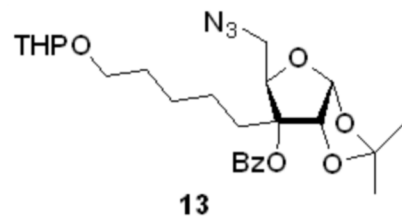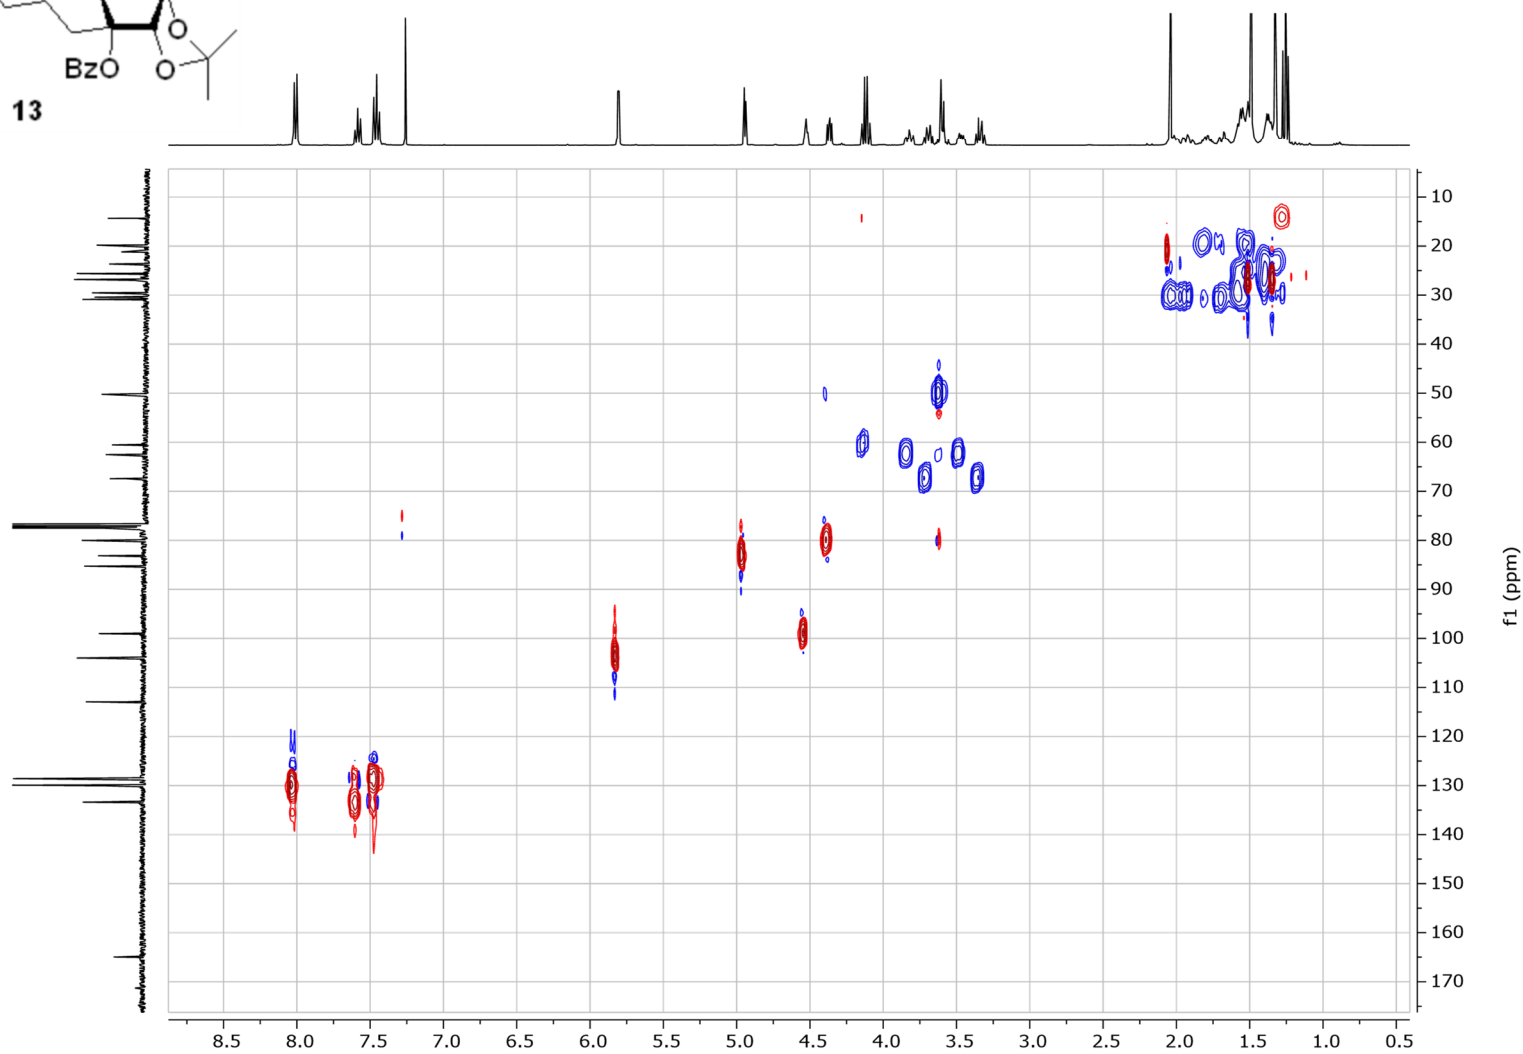

**5-Azido-5-deoxy-1,2-*O*-isopropylidene-3-*C*-(6-(5-(((tetrahydro-2H-pyran-2-yl)oxy)pentyl)-3-*O*-benzoyl- $\alpha$ -D-ribofuranose (13)**  
 [HMBC, 400 MHz, CDCl<sub>3</sub>]

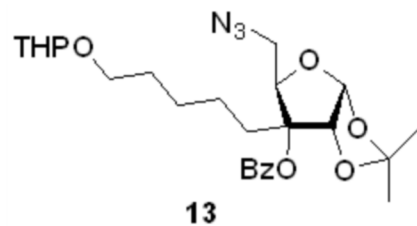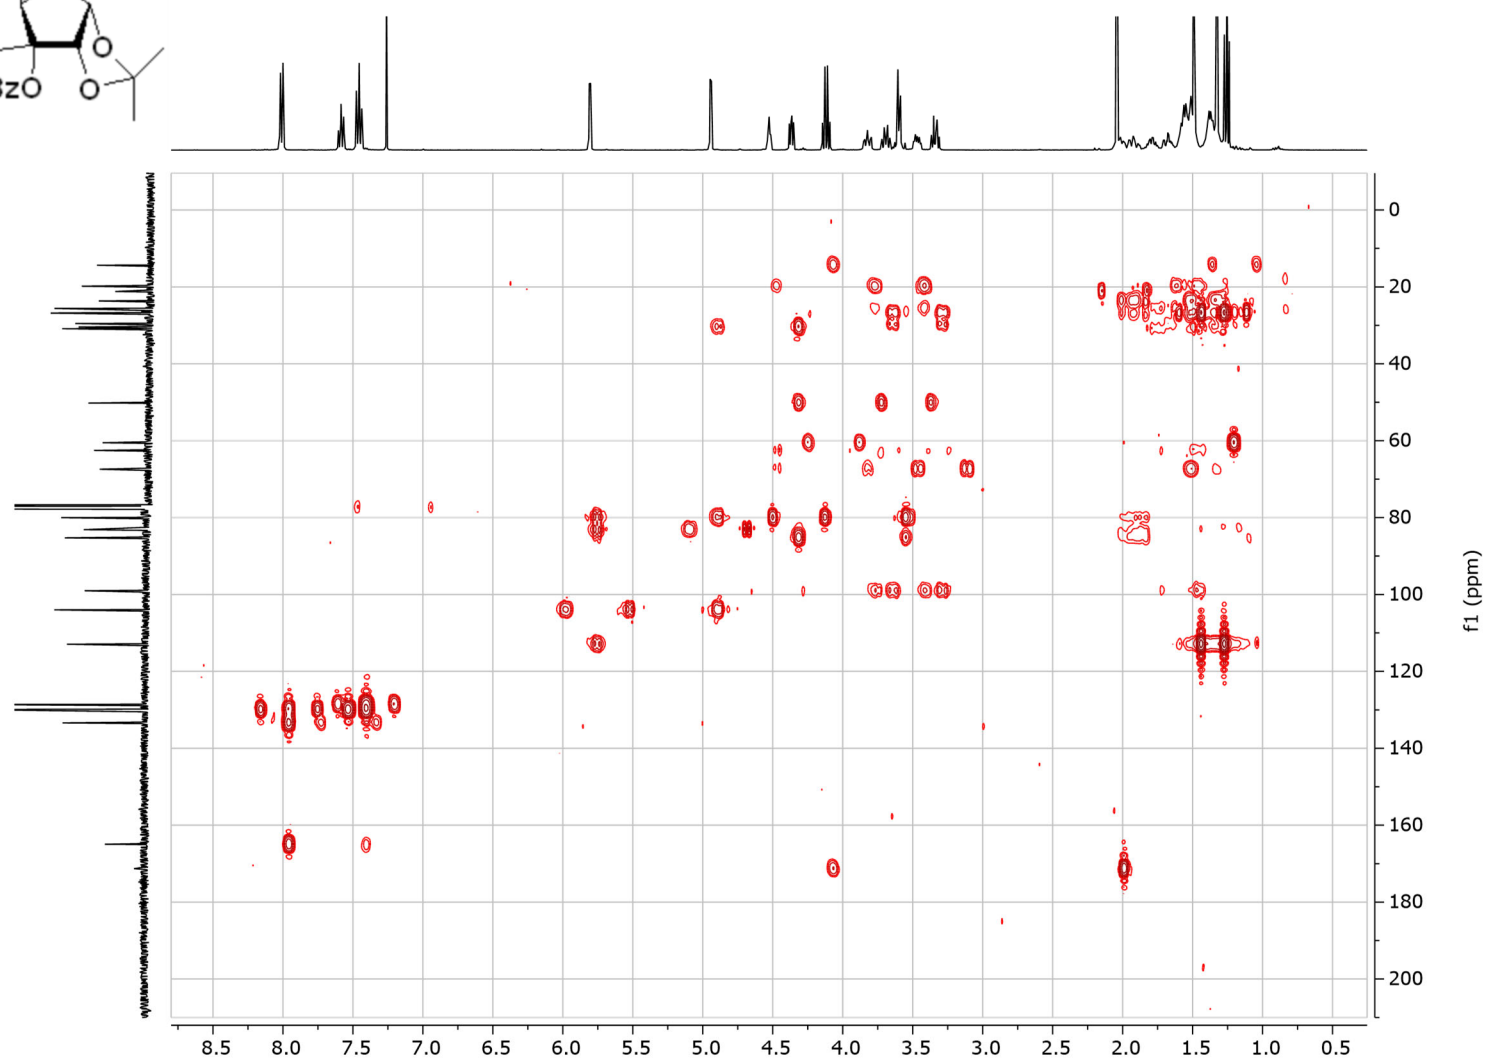

**5-Azido-5-deoxy-1,2-*O*-isopropylidene-3-*C*-(6-(5-(((tetrahydro-2H-pyran-2-yl)oxy)pentyl)-3-*O*-benzoyl- $\alpha$ -D-ribofuranose (13)**  
 [COSY, 400 MHz, CDCl<sub>3</sub>]

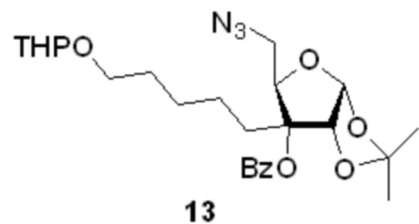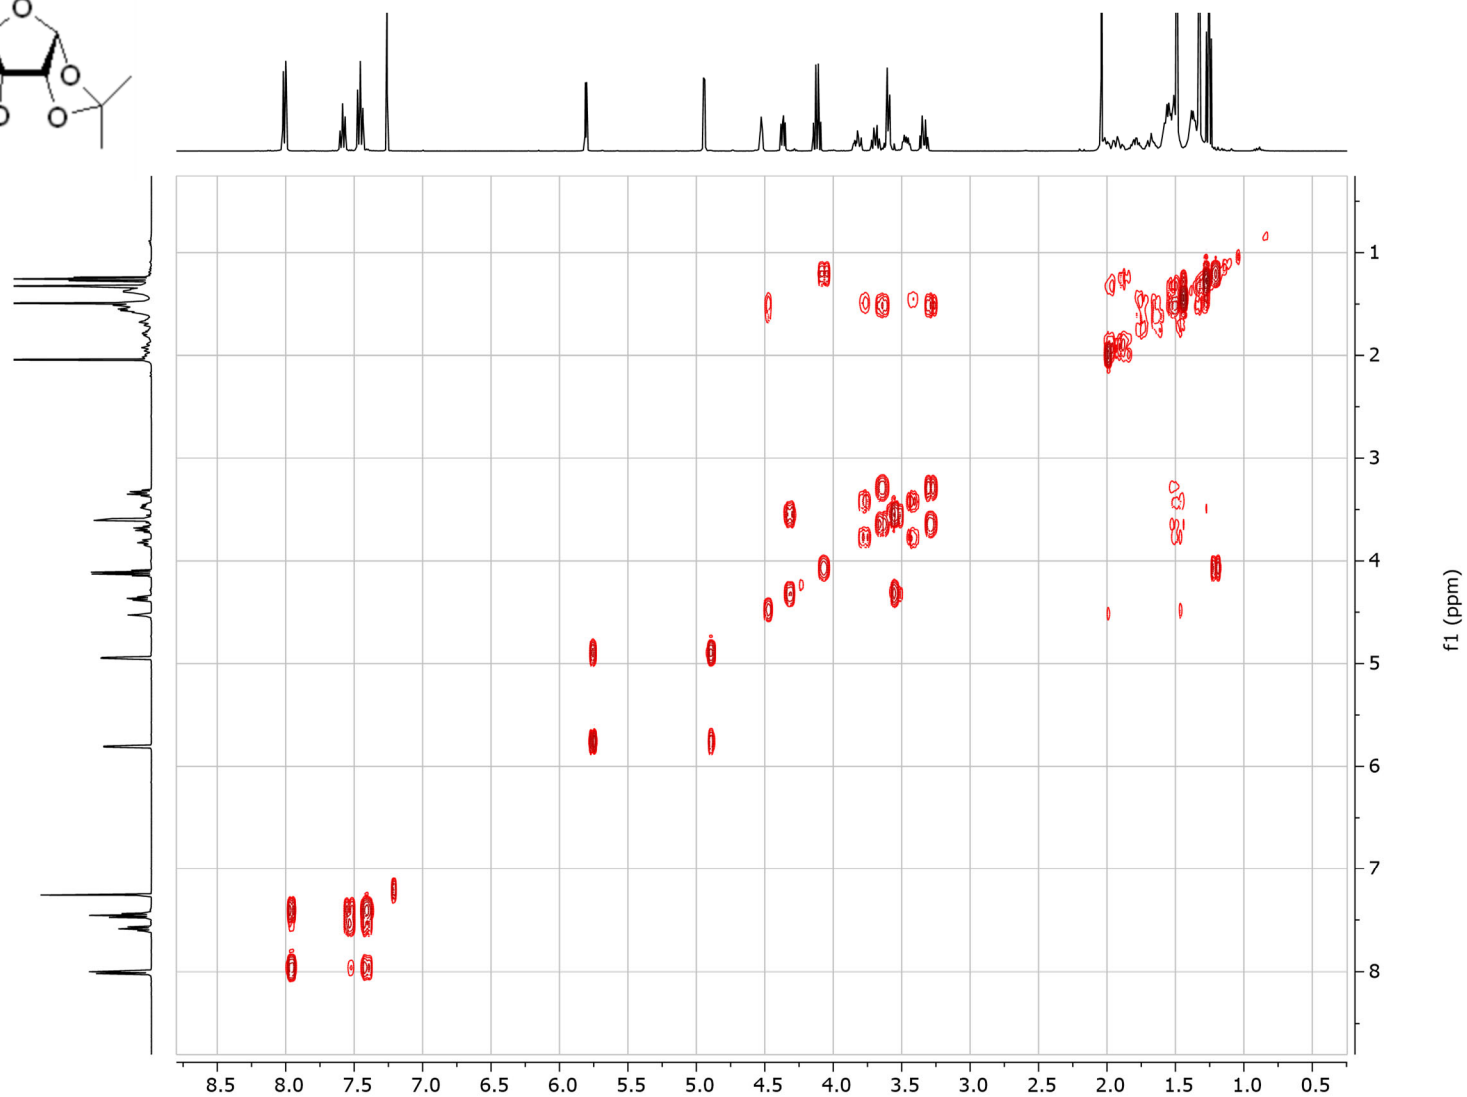

**5-Azido-5-deoxy-1,2-*O*-isopropylidene-3-*C*-(5-hydroxypentyl)-3-*O*-benzoyl- $\alpha$ -D-ribofuranose (14)**

[ $^1\text{H}$  NMR, 400 MHz,  $\text{CDCl}_3$ ]

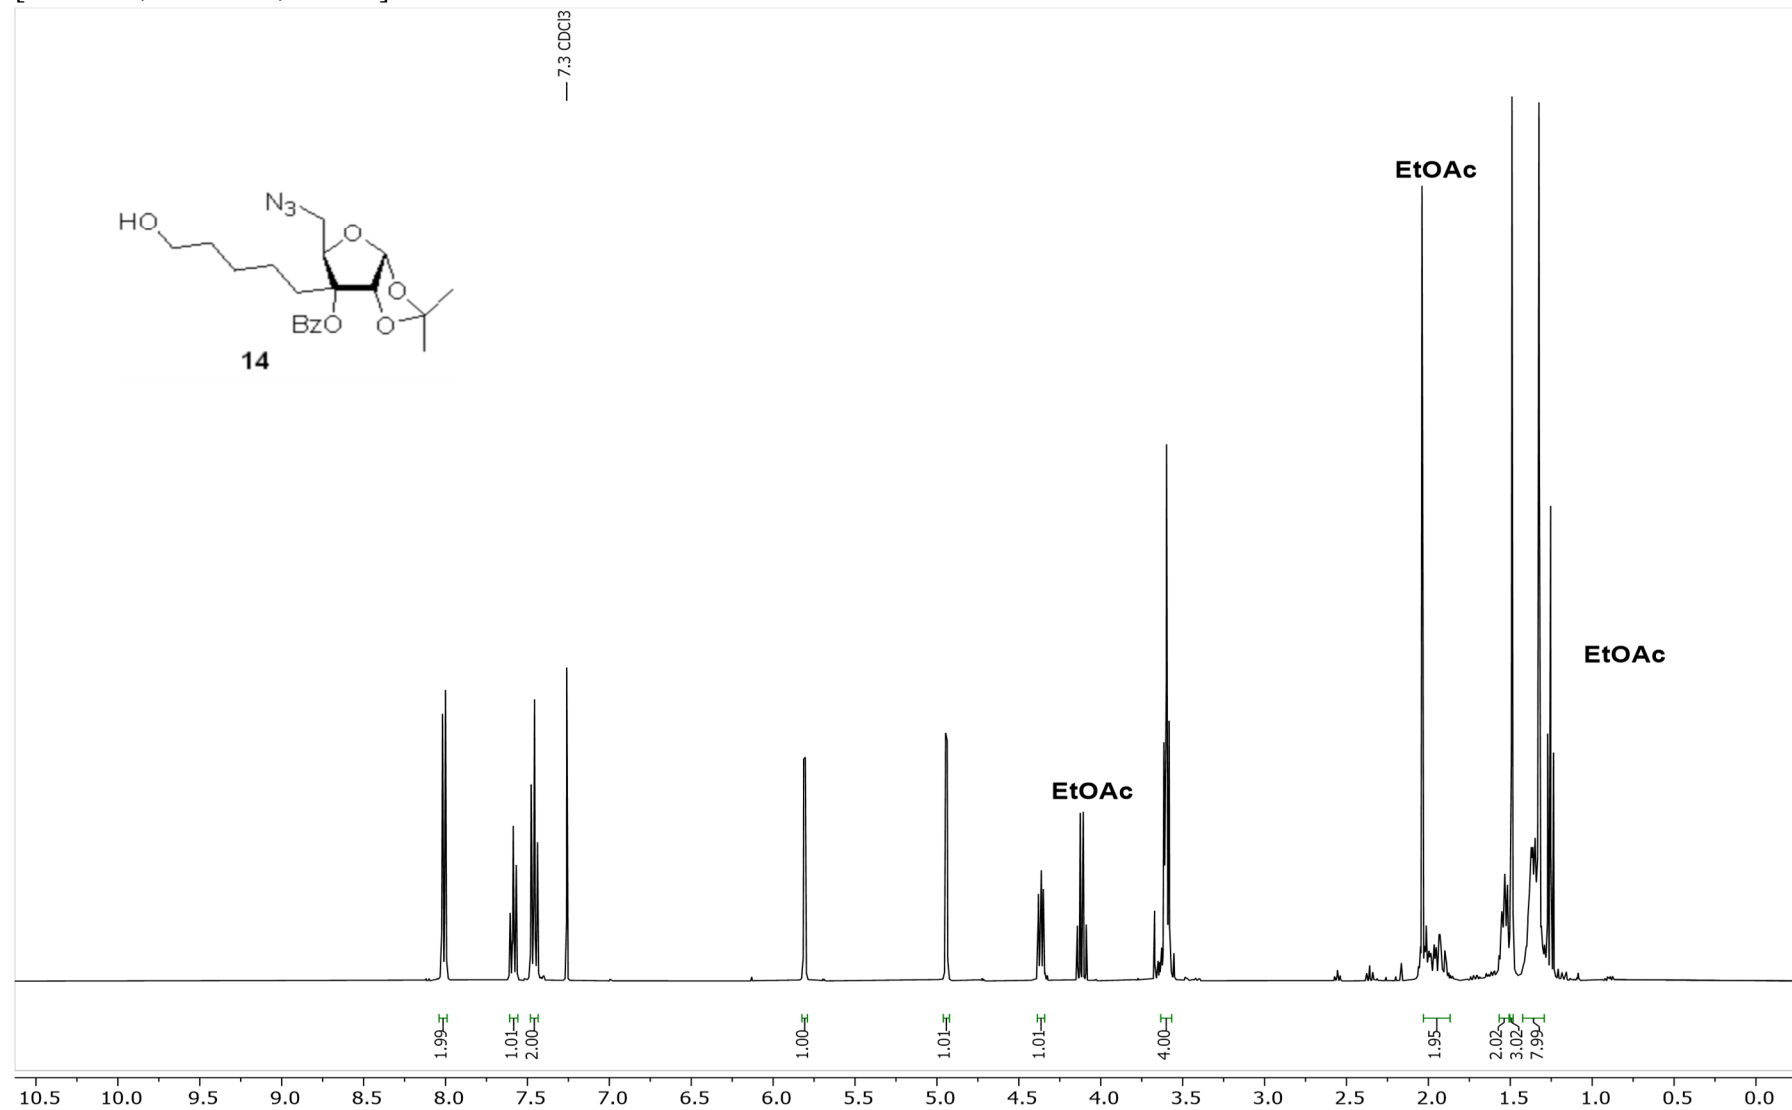

**5-Azido-5-deoxy-1,2-*O*-isopropylidene-3-*C*-(5-hydroxypentyl)-3-*O*-benzoyl- $\alpha$ -D-ribofuranose (14)**

[ $^{13}\text{C}$  NMR, 101 MHz,  $\text{CDCl}_3$ ]

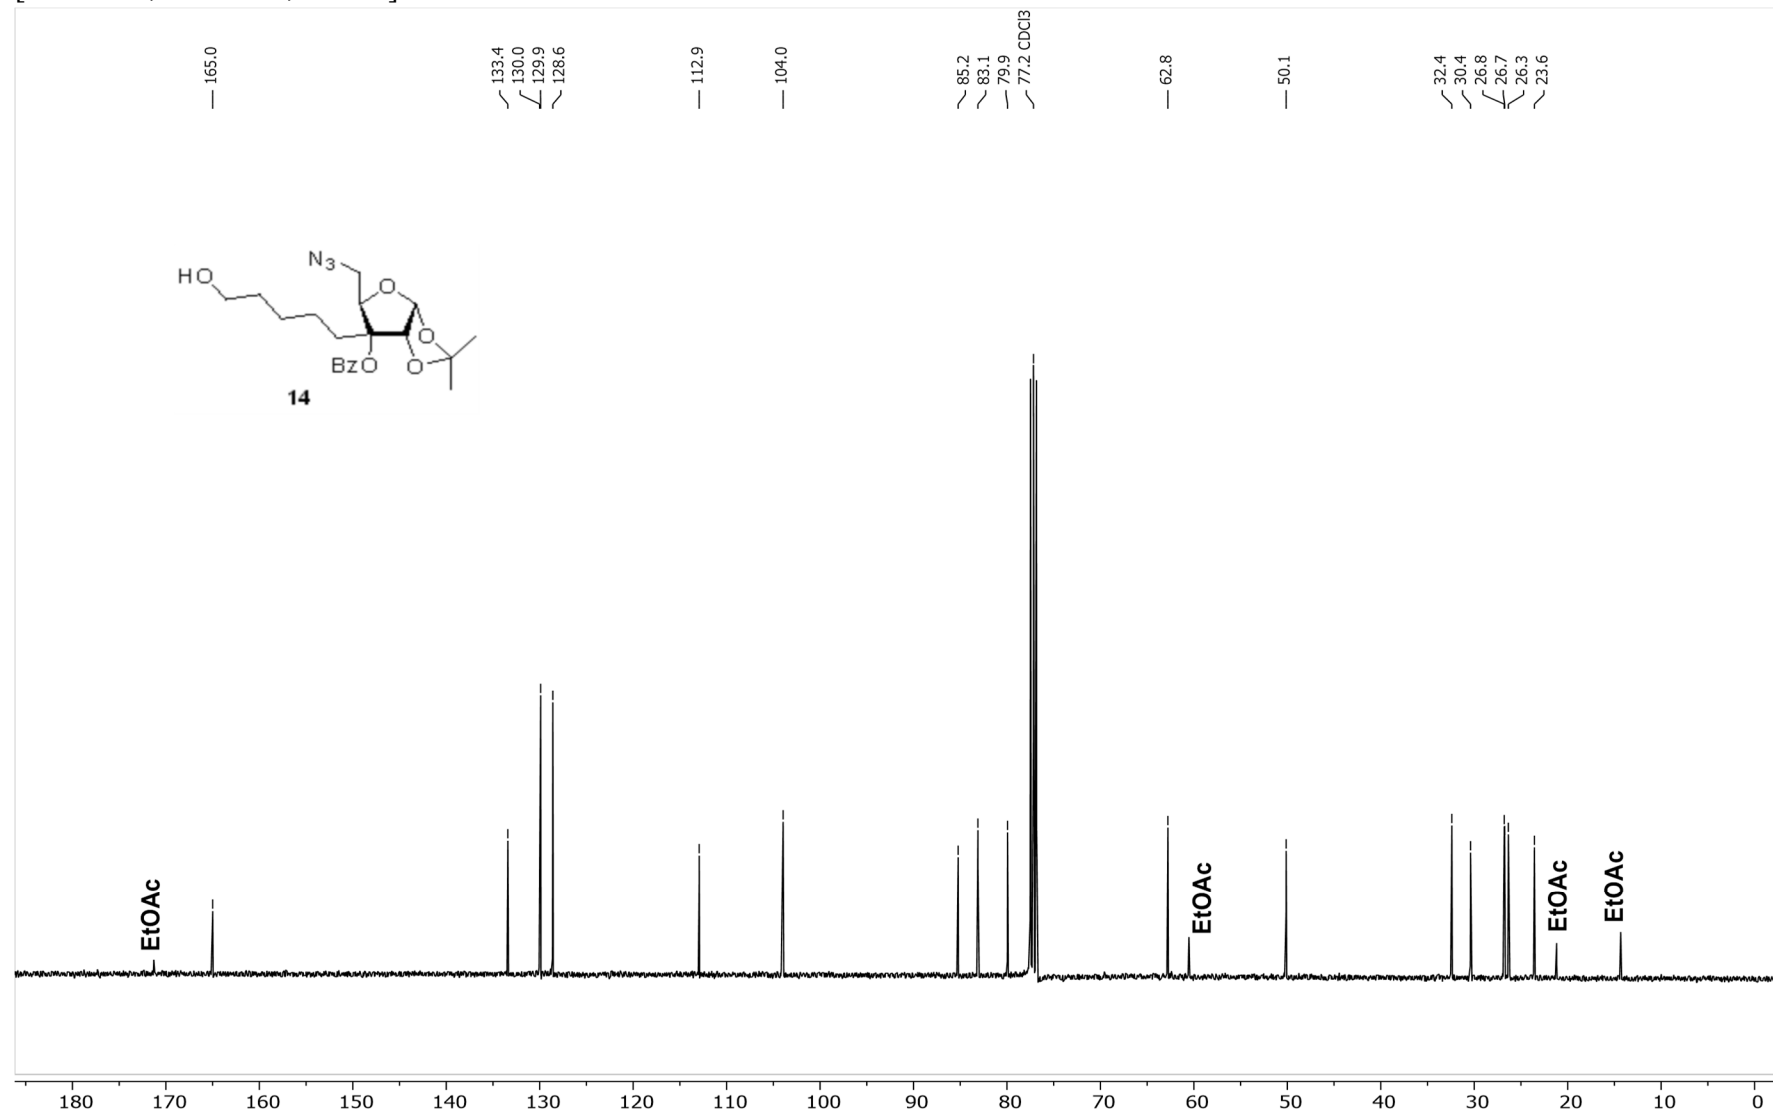

**Azido-5-deoxy-1,2-*O*-isopropylidene-3-*C*-(5-hydroxypentyl)-3-*O*-benzoyl- $\alpha$ -D-ribofuranose (14)**

[HSQC, 400 MHz, CDCl<sub>3</sub>]

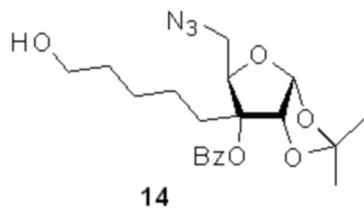

**14**

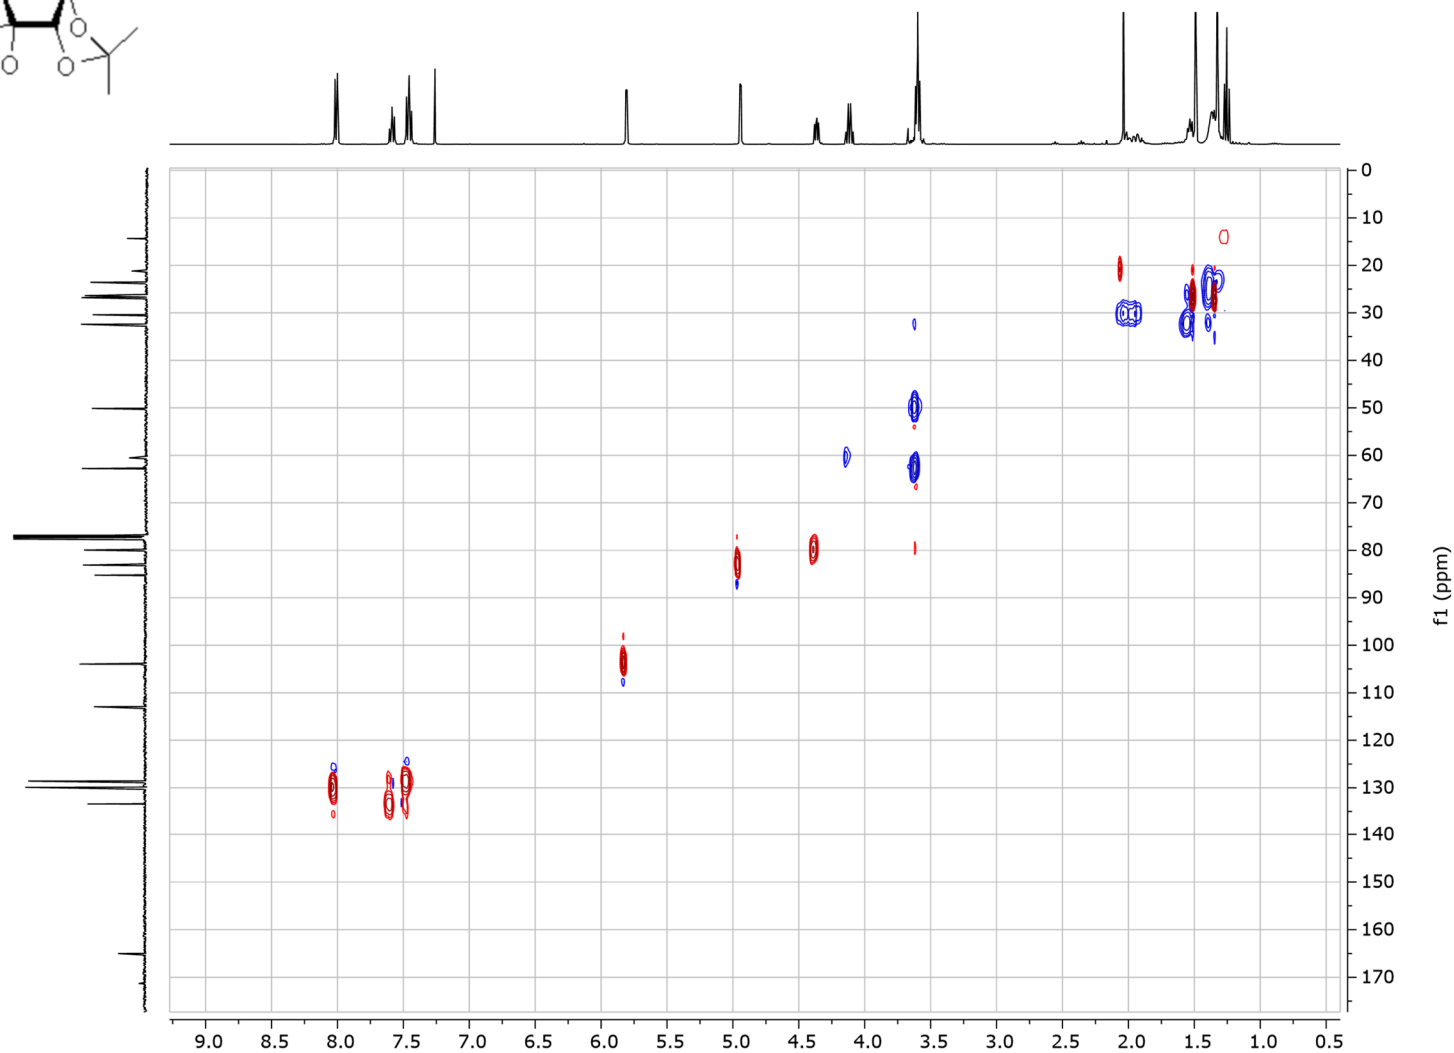

**5-Azido-5-deoxy-1,2-*O*-isopropylidene-3-*C*-(5-hydroxypentyl)-3-*O*-benzoyl- $\alpha$ -D-ribofuranose (14)**

[HMBC, 400 MHz, CDCl<sub>3</sub>]

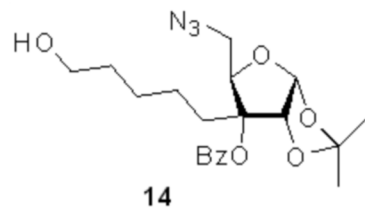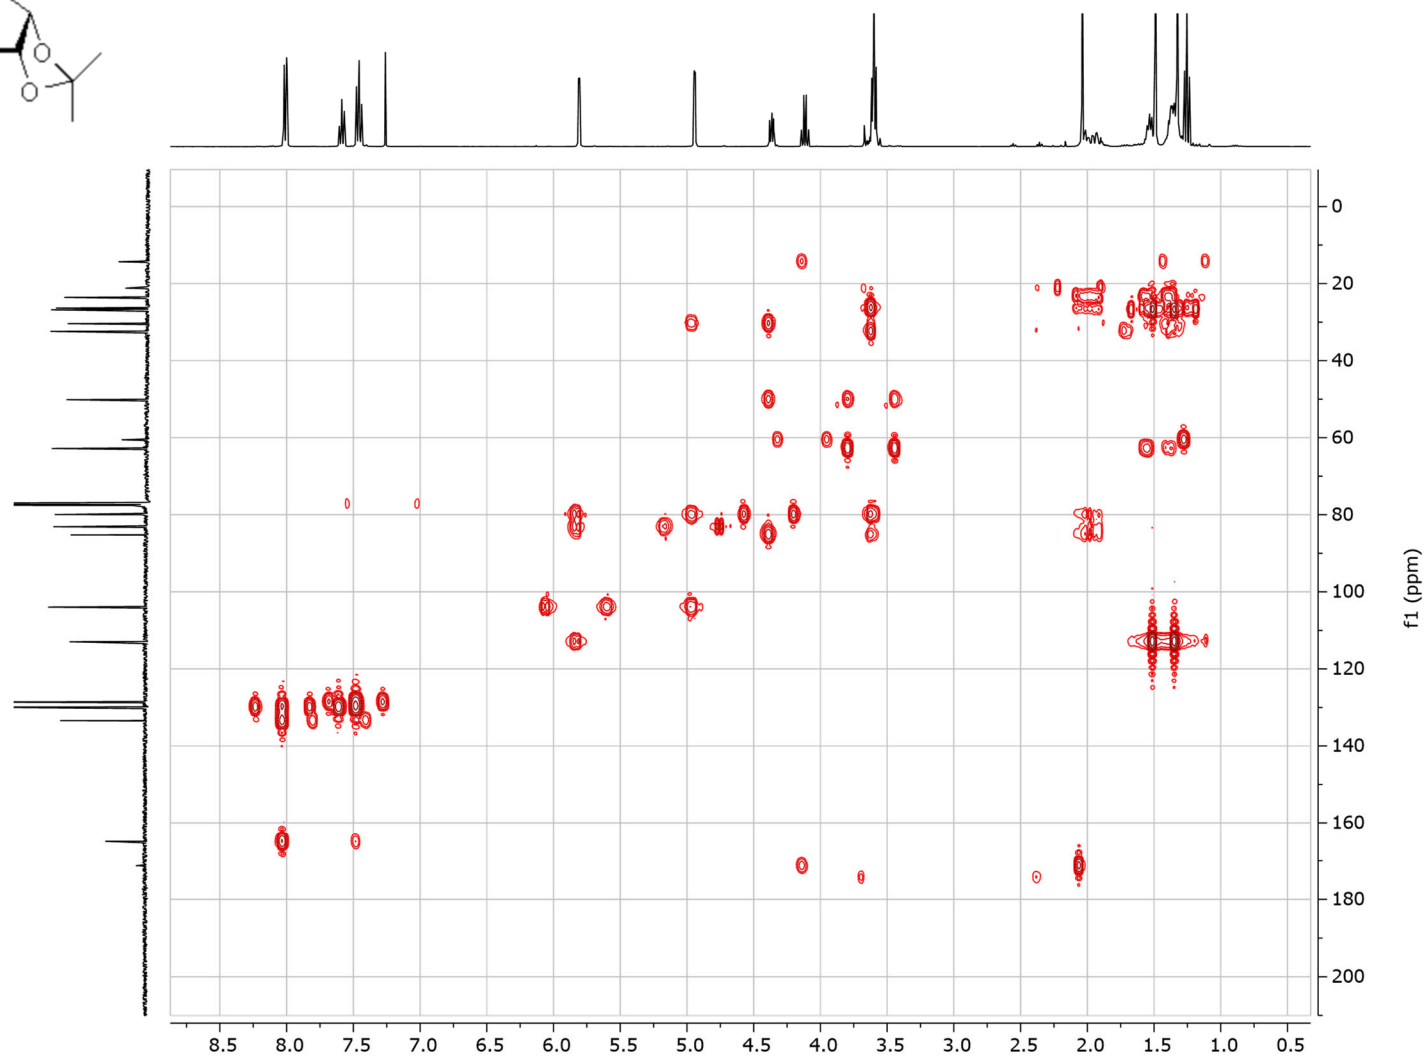

**5-Azido-5-deoxy-1,2-*O*-isopropylidene-3-*C*-(5-hydroxypentyl)-3-*O*-benzoyl- $\alpha$ -D-ribofuranose (14)**

[COSY, 400 MHz, CDCl<sub>3</sub>]

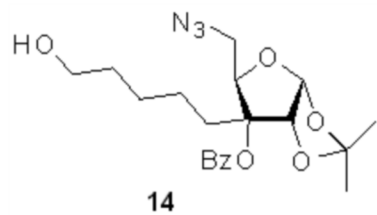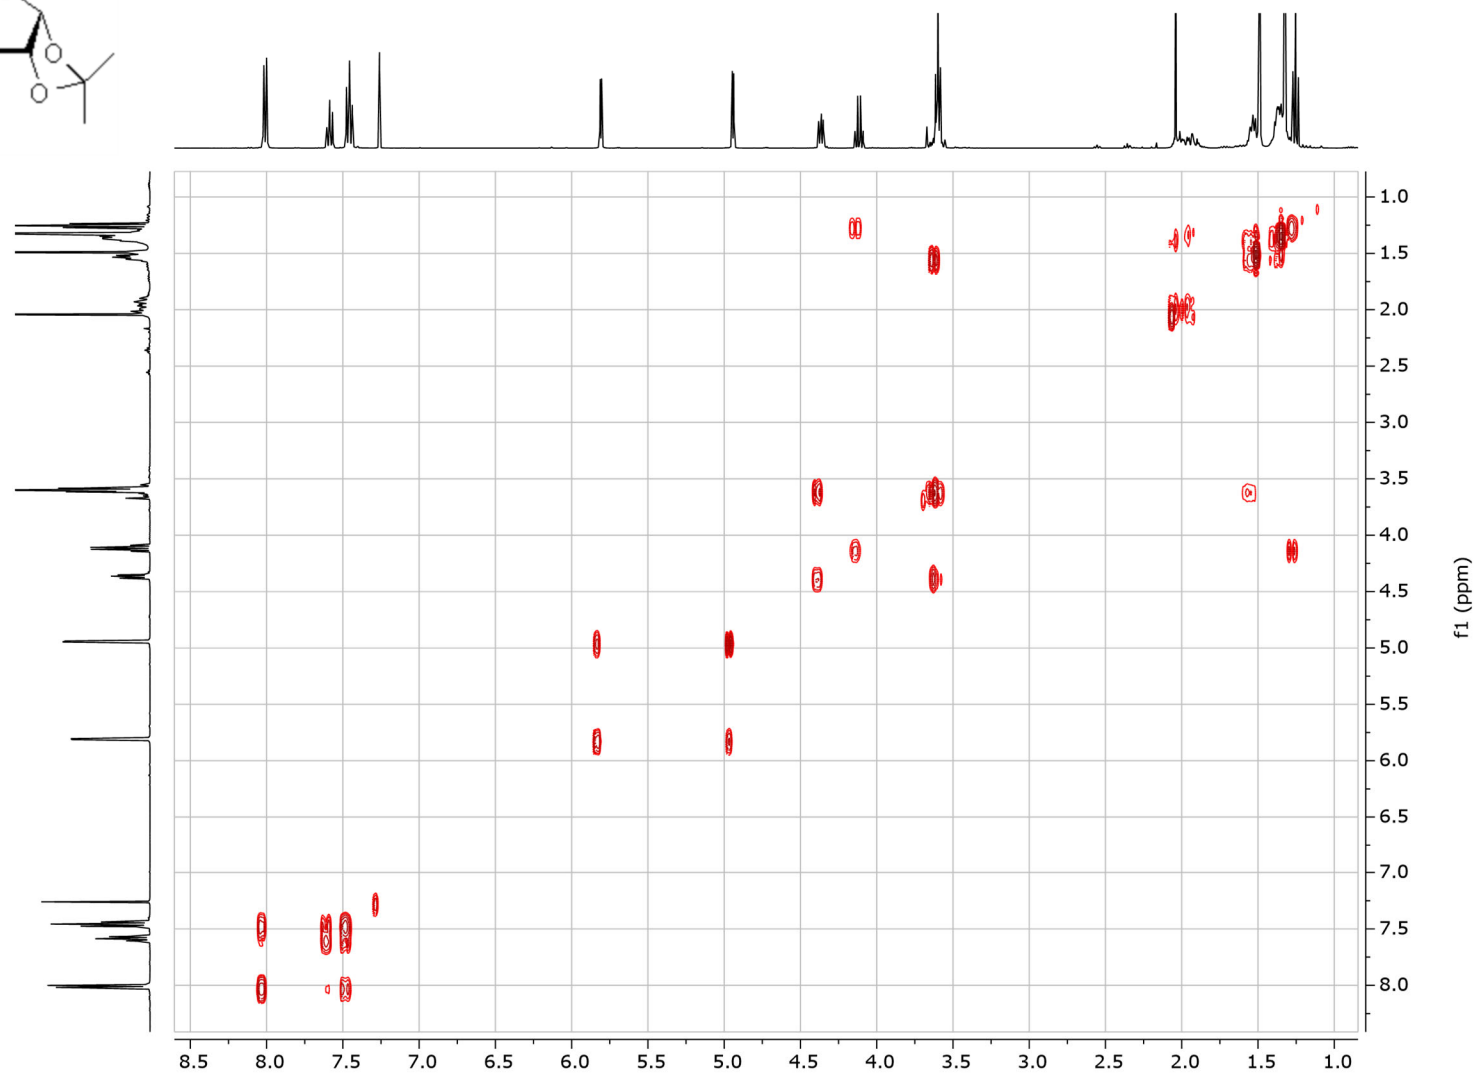



[<sup>1</sup>H NMR, 400 MHz, CDCl<sub>3</sub>]

[<sup>1</sup>H NMR, 400 MHz, CDCl<sub>3</sub>]

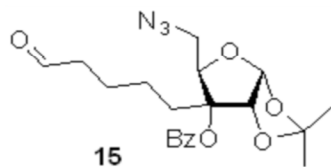

**5-Azido-5-deoxy-1,2-*O*-isopropylidene-3-*C*-(5-oxopentyl)-3-*O*-benzoyl- $\alpha$ -D-ribofuranose (15)**

[ $^{13}\text{C}$  NMR, 101 MHz,  $\text{CDCl}_3$ ]

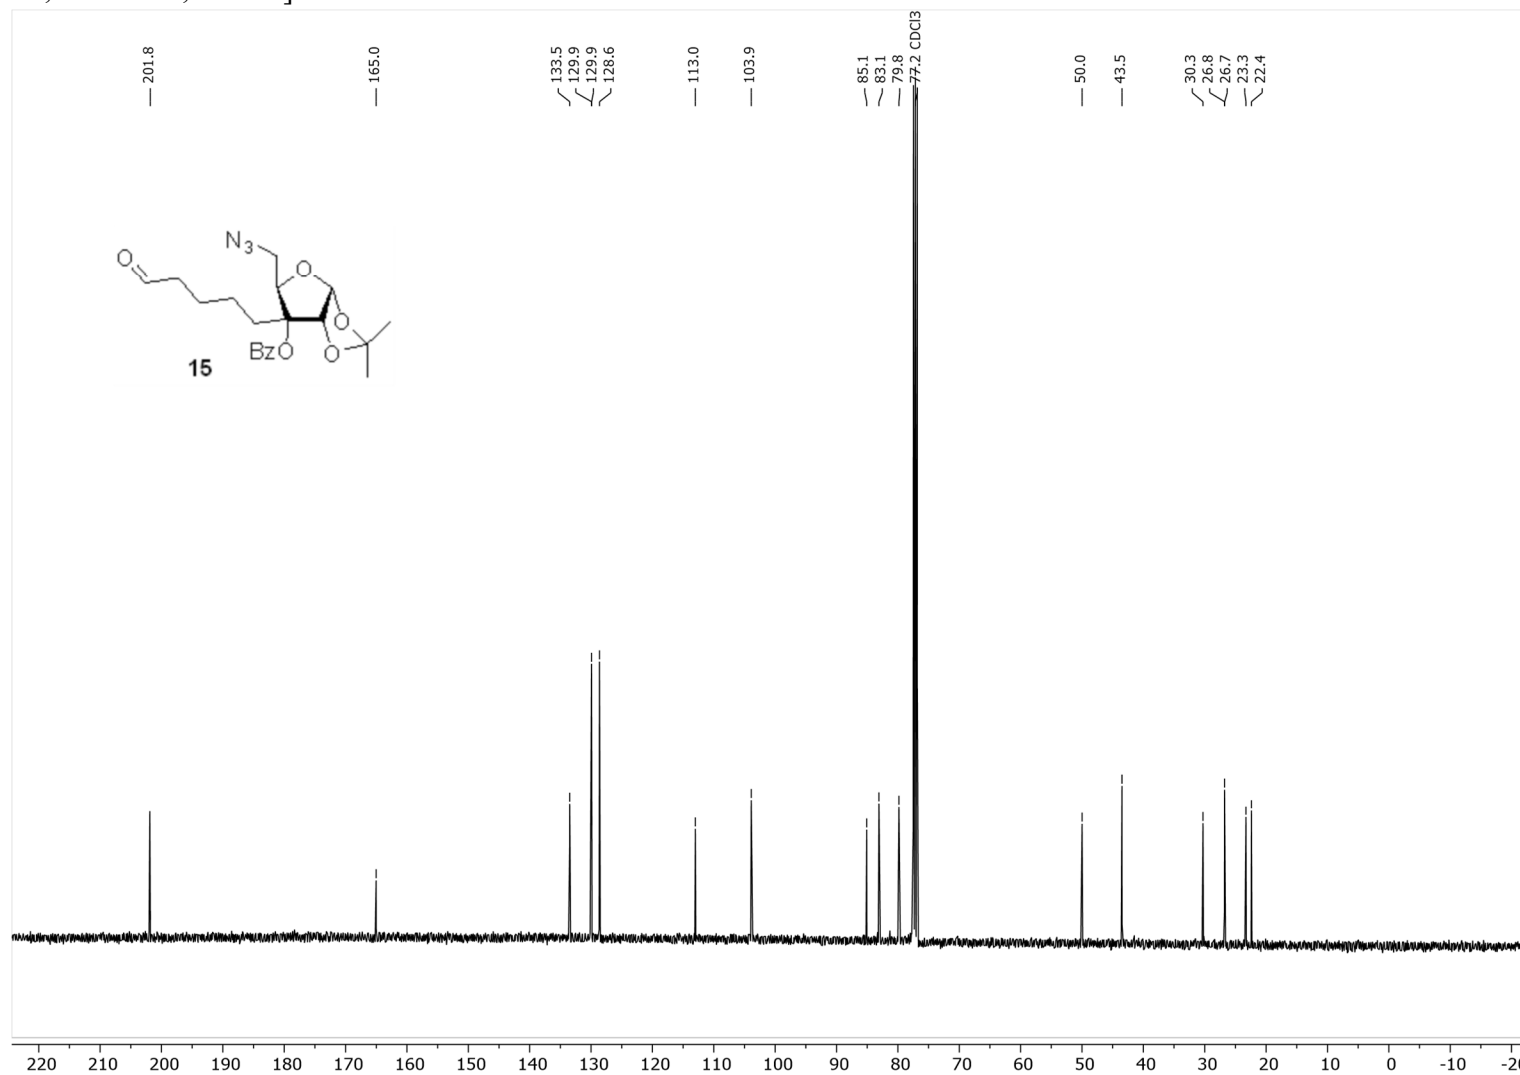

**5-Azido-5-deoxy-1,2-*O*-isopropylidene-3-*C*-(5-oxopentyl)-3-*O*-benzoyl- $\alpha$ -D-ribofuranose (15)**

[HSQC, 400 MHz, CDCl<sub>3</sub>]

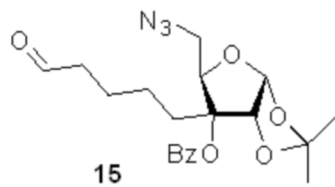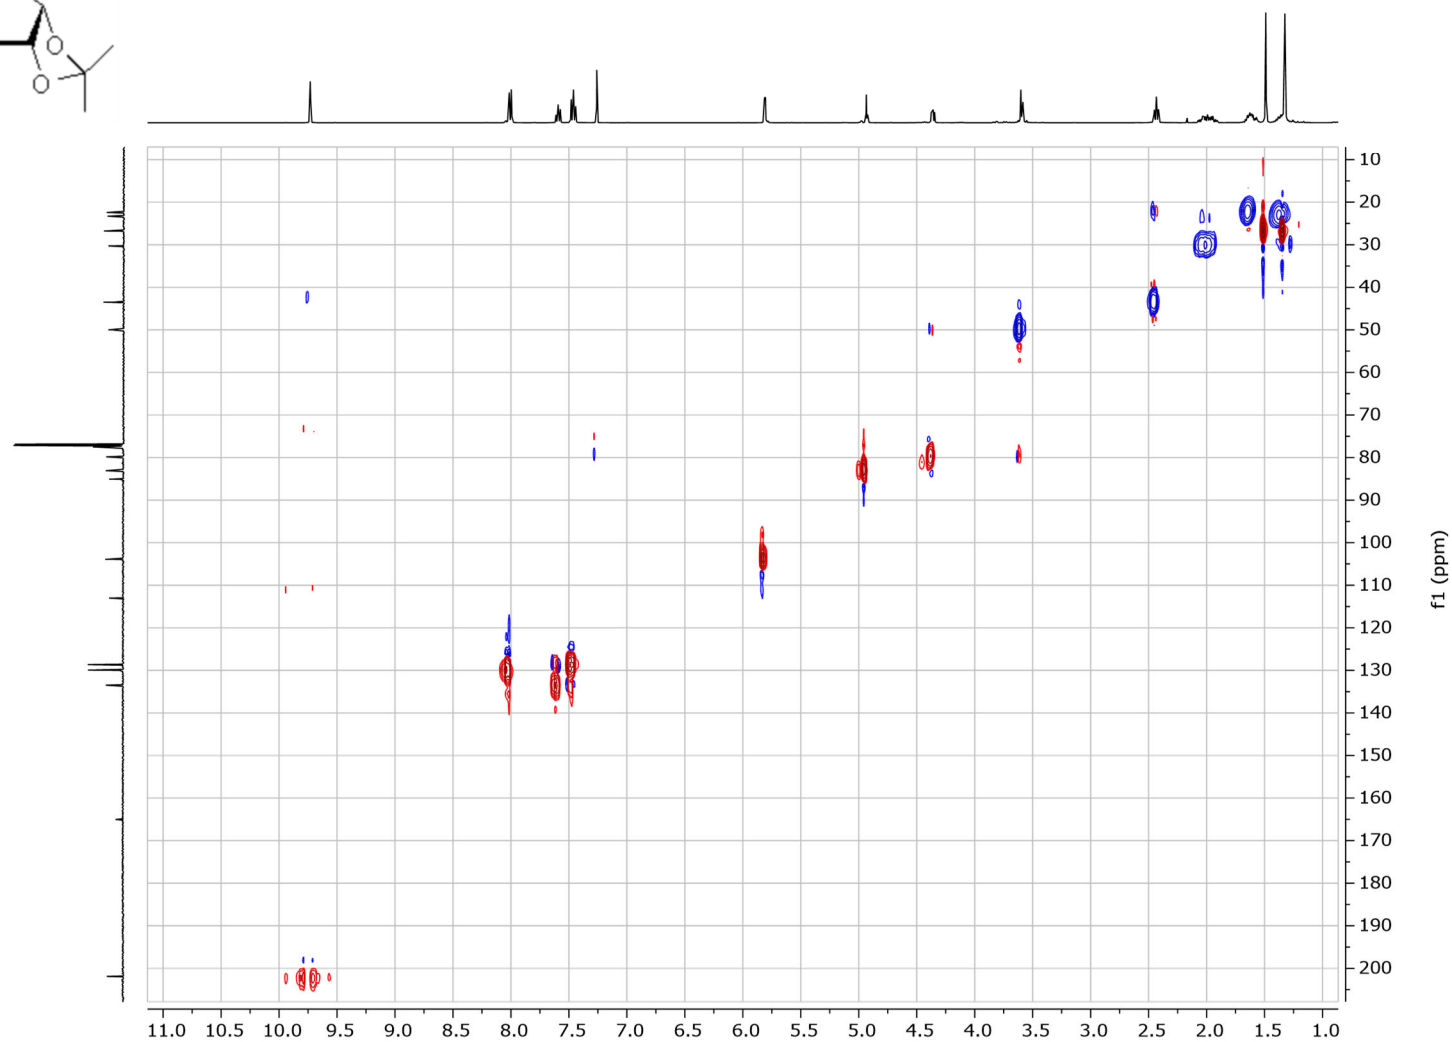

**5-Azido-5-deoxy-1,2-*O*-isopropylidene-3-*C*-(5-oxopentyl)-3-*O*-benzoyl- $\alpha$ -D-ribofuranose (15)**

[HMBC, 400 MHz, CDCl<sub>3</sub>]

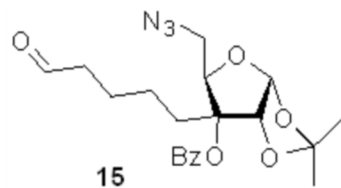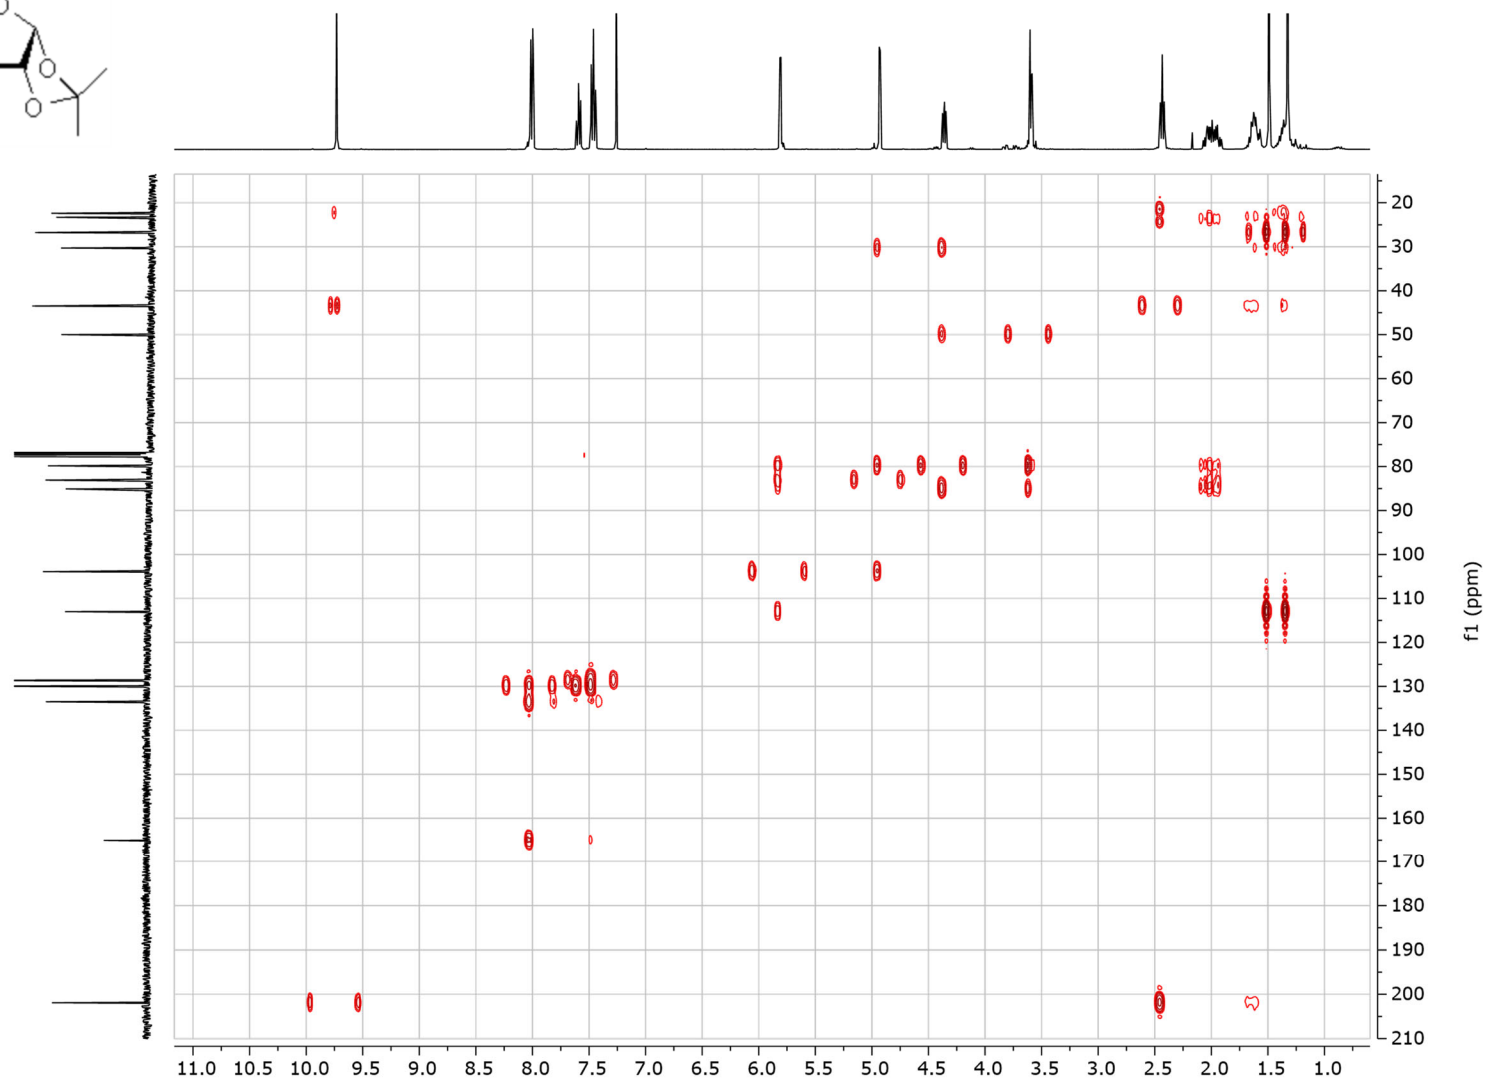

**5-Azido-5-deoxy-1,2-*O*-isopropylidene-3-*C*-(5-oxopentyl)-3-*O*-benzoyl- $\alpha$ -D-ribofuranose (15)**

[COSY, 400 MHz, CDCl<sub>3</sub>]

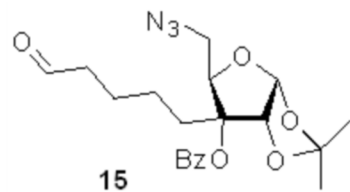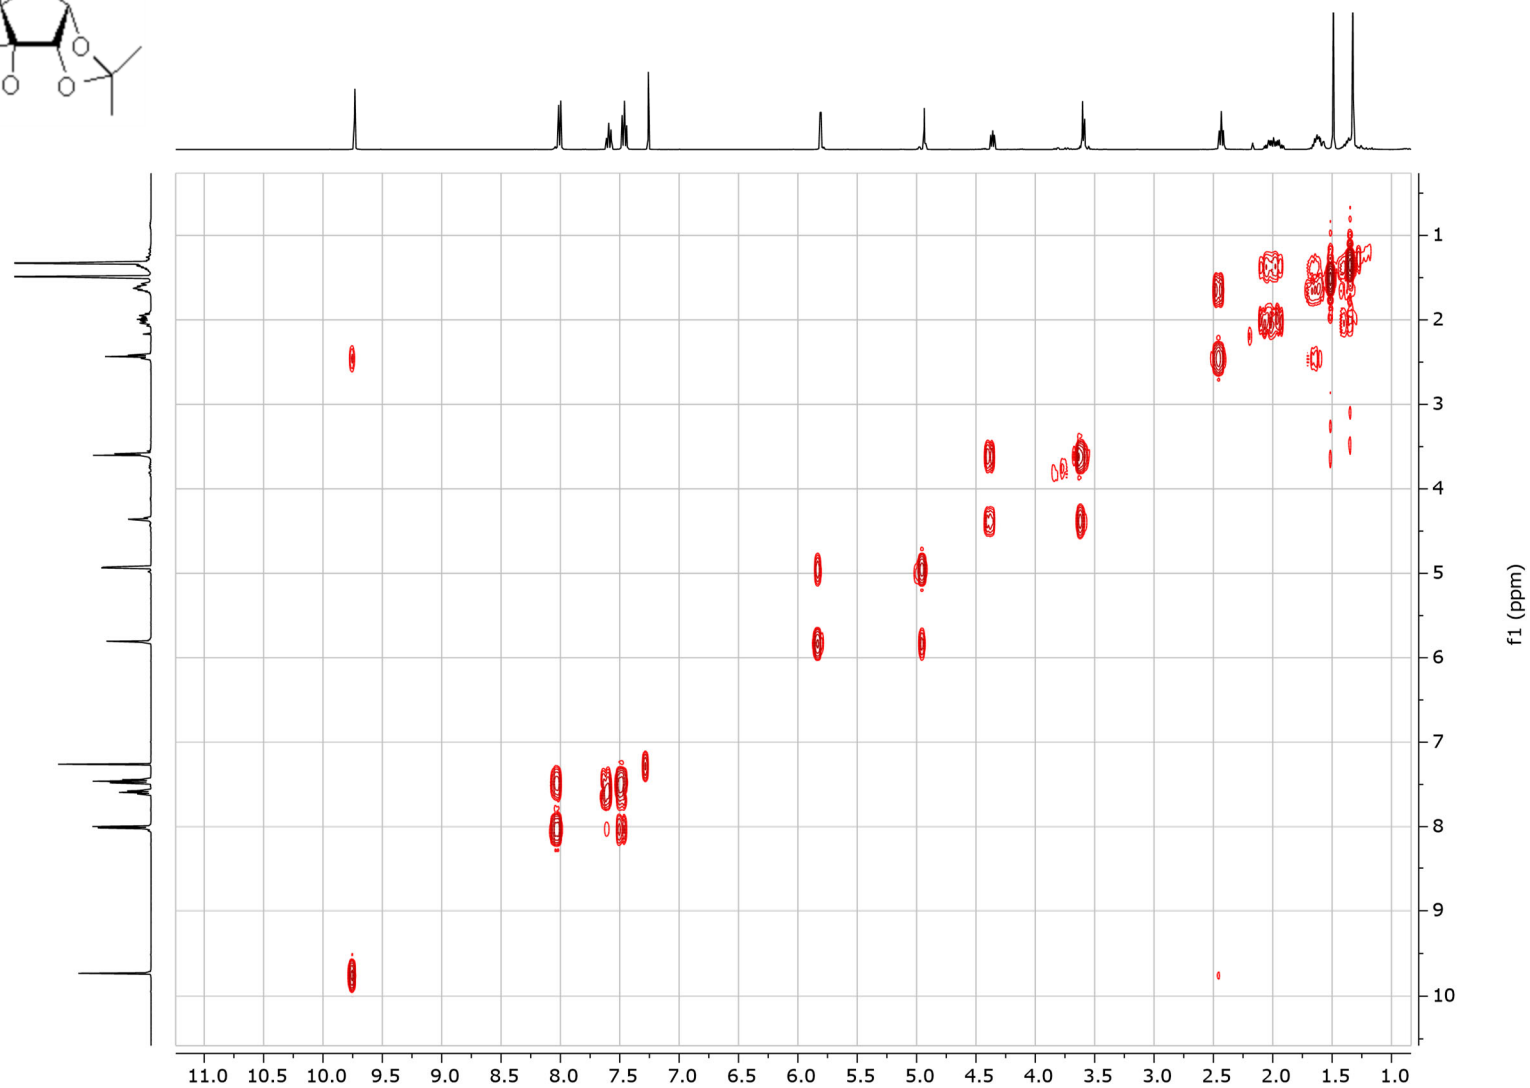

**5-Azido-5-deoxy-1,2-*O*-isopropylidene-3-*C*-(5-(dimethylamino)pentyl)-3-*O*-benzoyl- $\alpha$ -D-ribofuranose (16)**

[ $^1\text{H}$  NMR, 400 MHz,  $\text{CDCl}_3$ ]

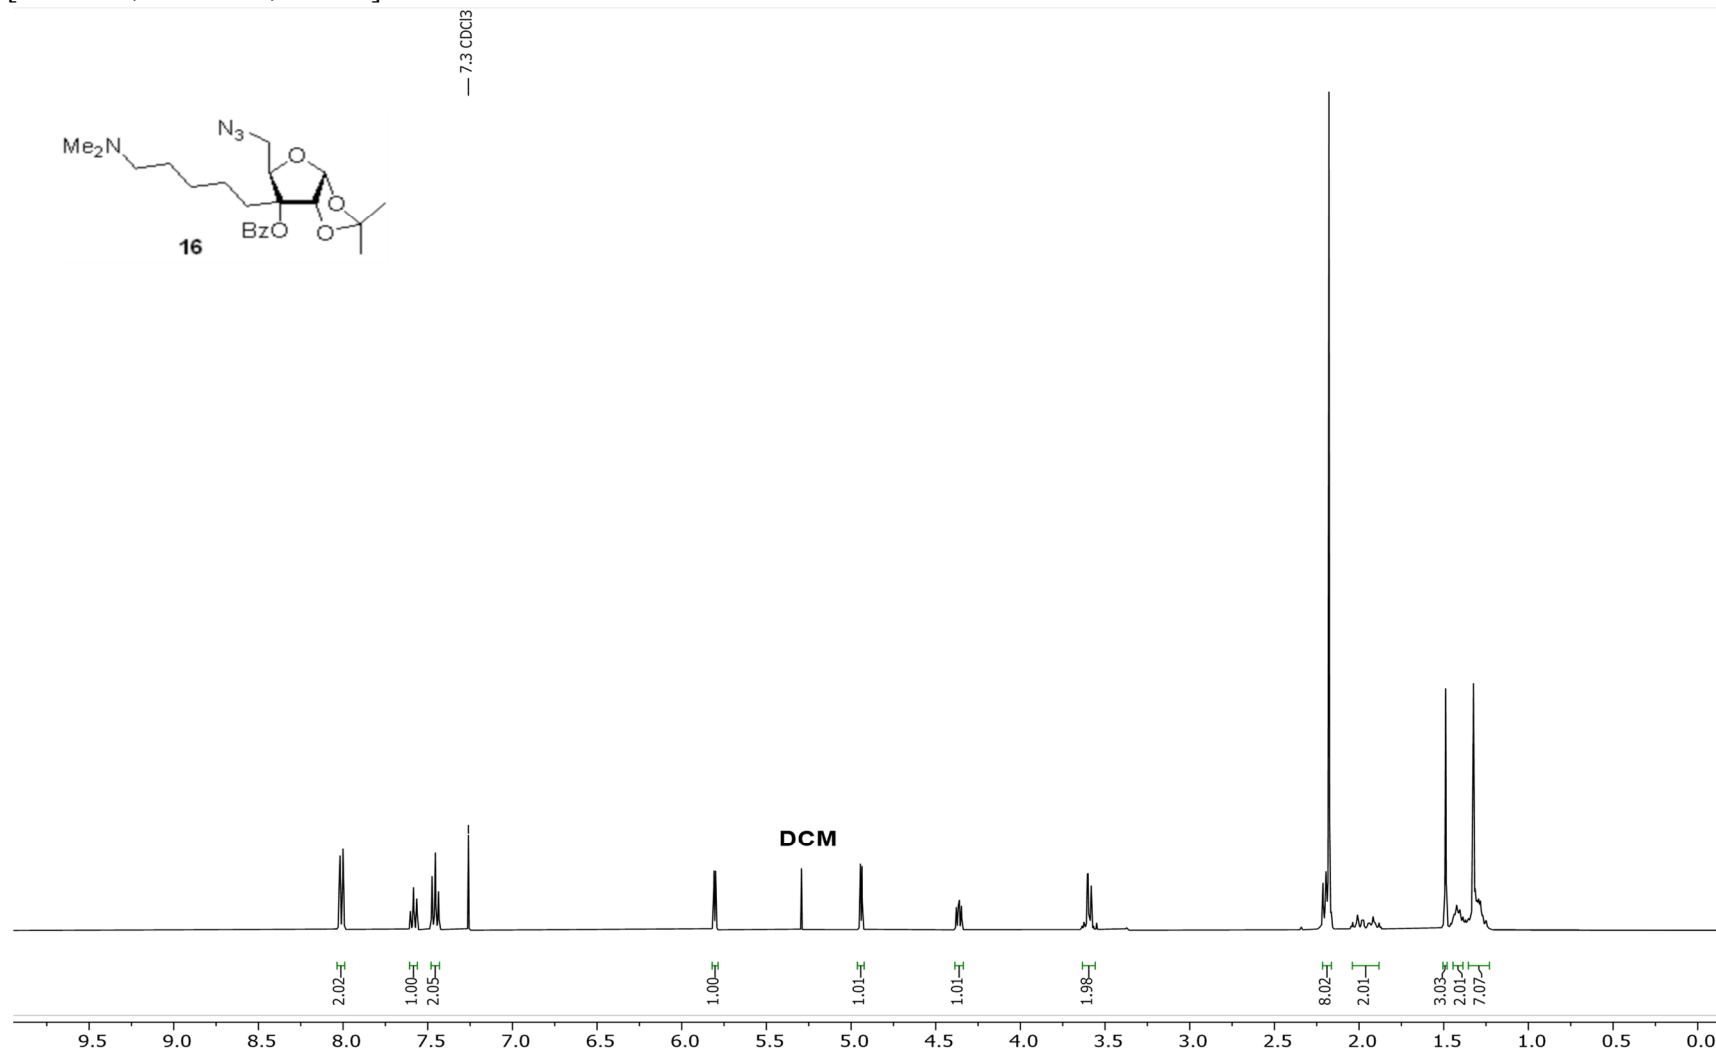

**5-Azido-5-deoxy-1,2-*O*-isopropylidene-3-*C*-(5-(dimethylamino)pentyl)-3-*O*-benzoyl- $\alpha$ -D-ribofuranose (16)**

[ $^{13}\text{C}$  NMR, 101 MHz,  $\text{CDCl}_3$ ]

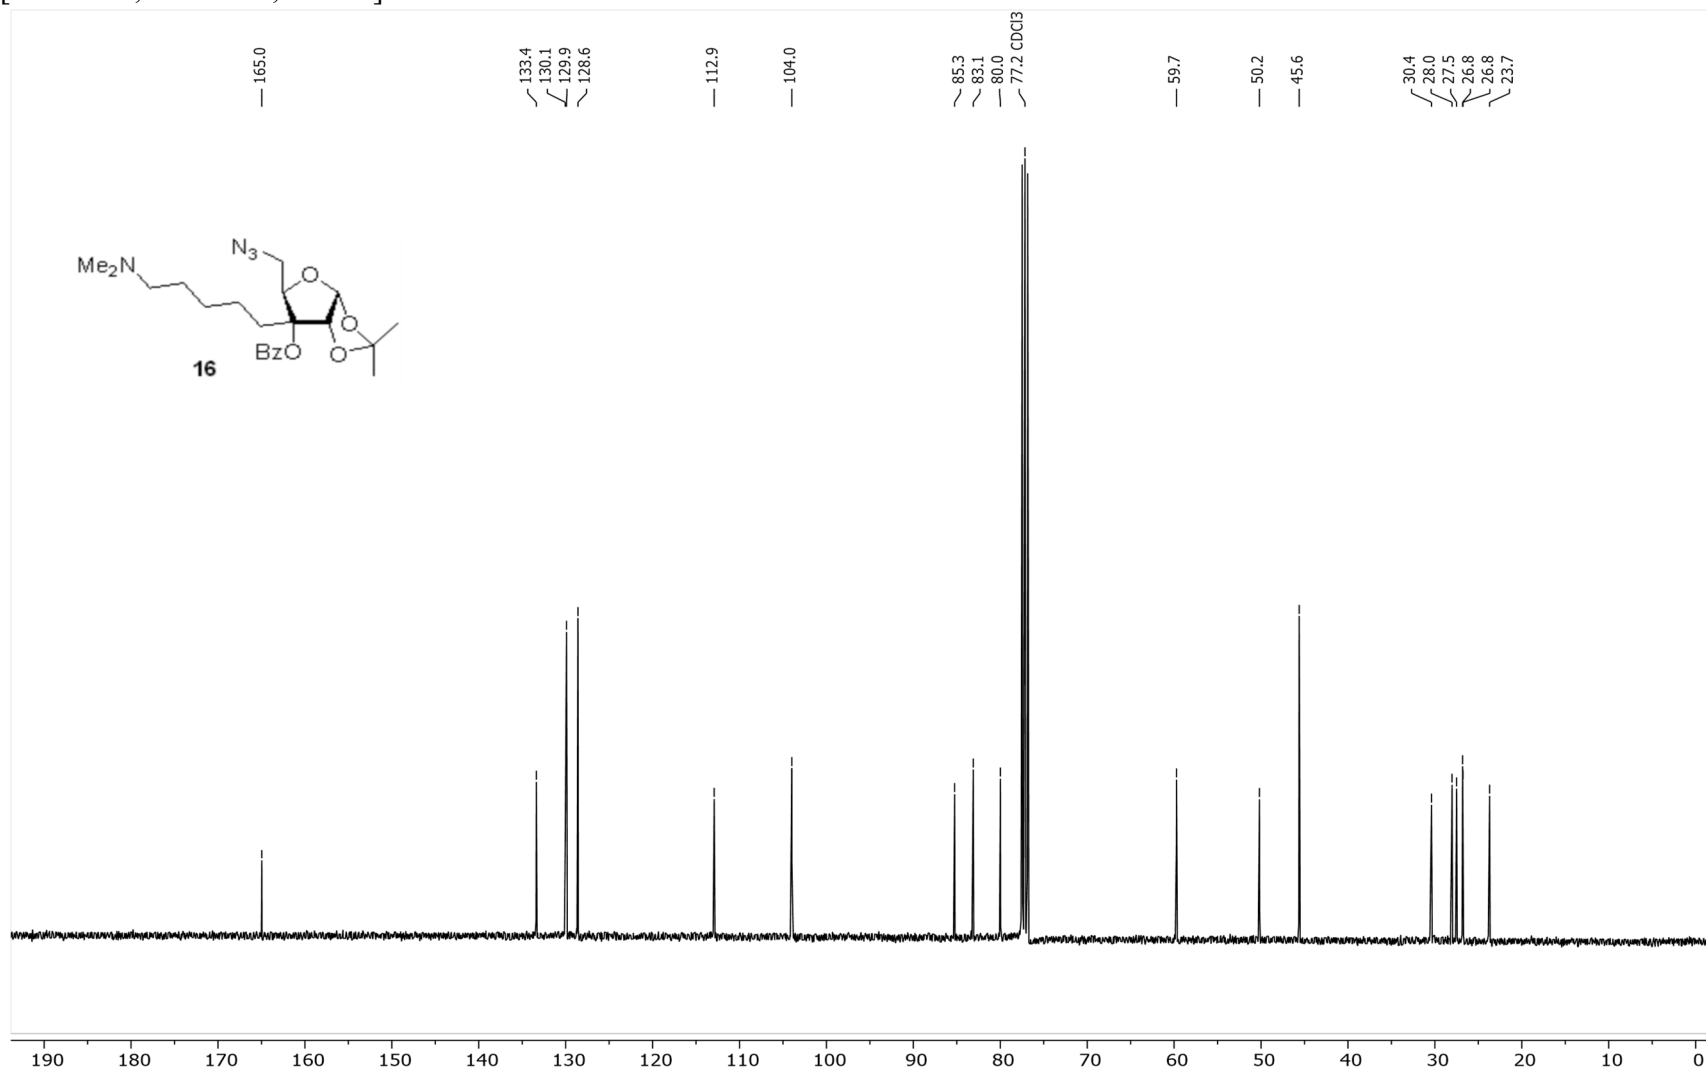

**5-Azido-5-deoxy-1,2-*O*-isopropylidene-3-*C*-(5-(dimethylamino)pentyl)-3-*O*-benzoyl- $\alpha$ -D-ribofuranose (16)**

[HSQC, 400 MHz, CDCl<sub>3</sub>]

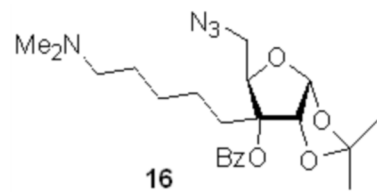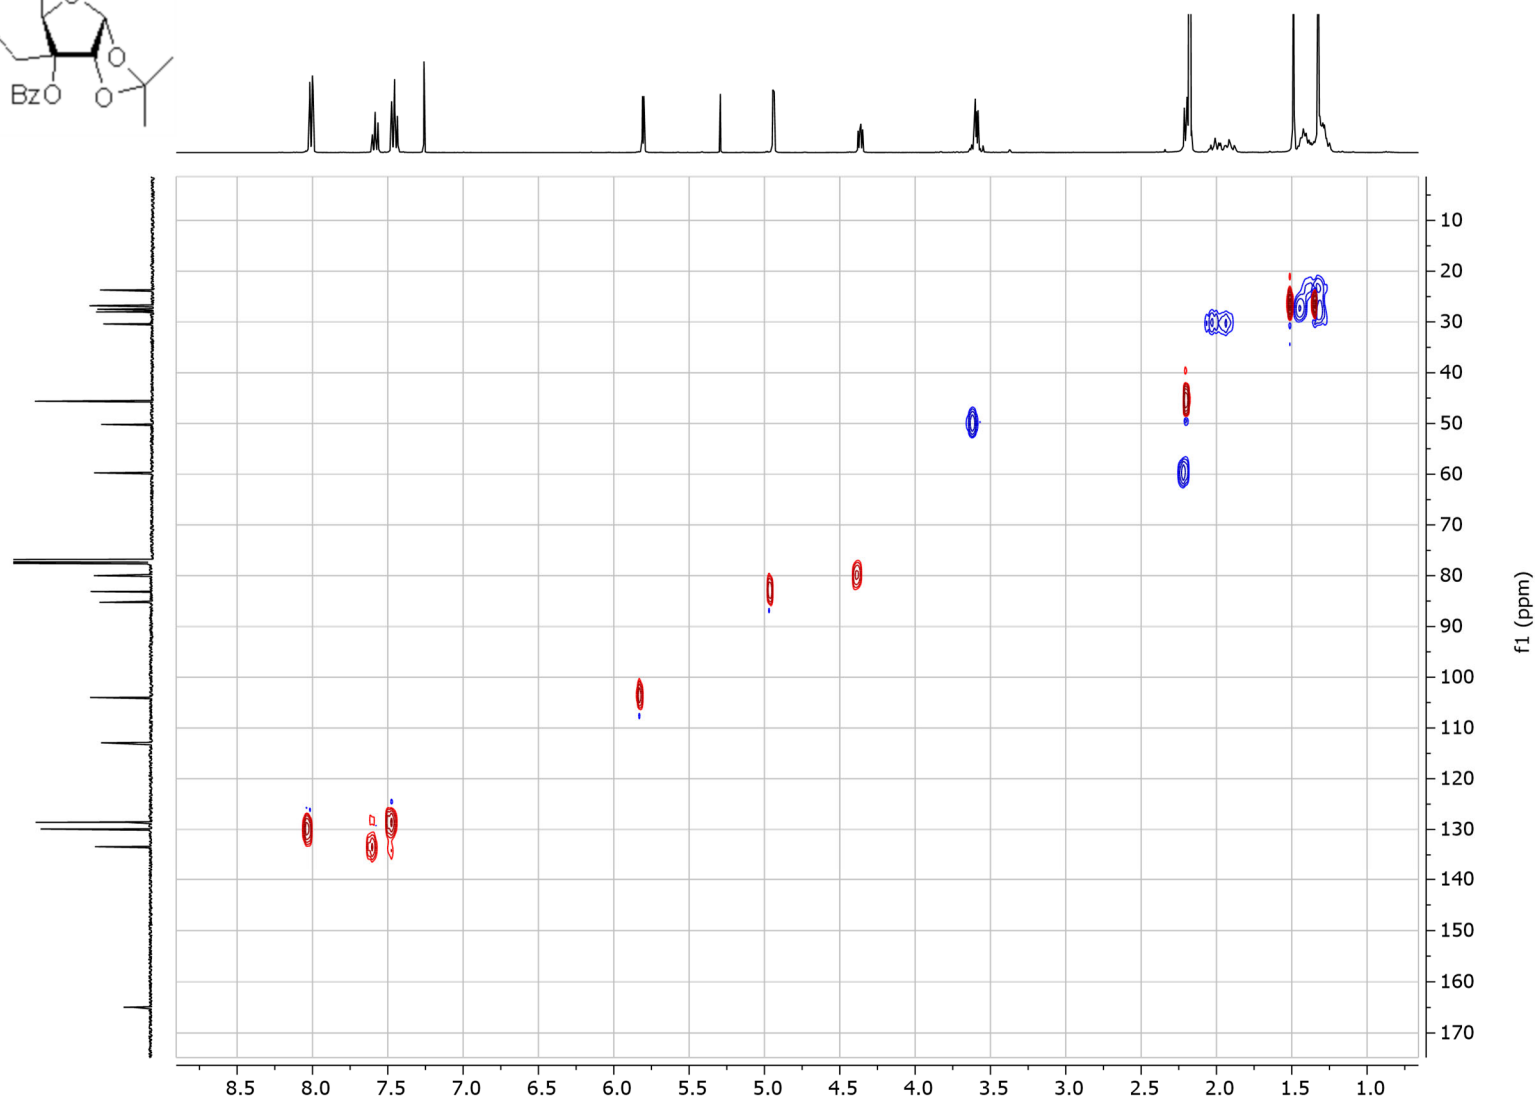



**5-Azido-5-deoxy-1,2-*O*-isopropylidene-3-*C*-(5-(dimethylamino)pentyl)-3-*O*-benzoyl- $\alpha$ -D-ribofuranose (16)**

[HMBC, 400 MHz, CDCl<sub>3</sub>]

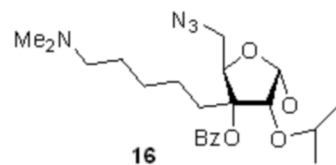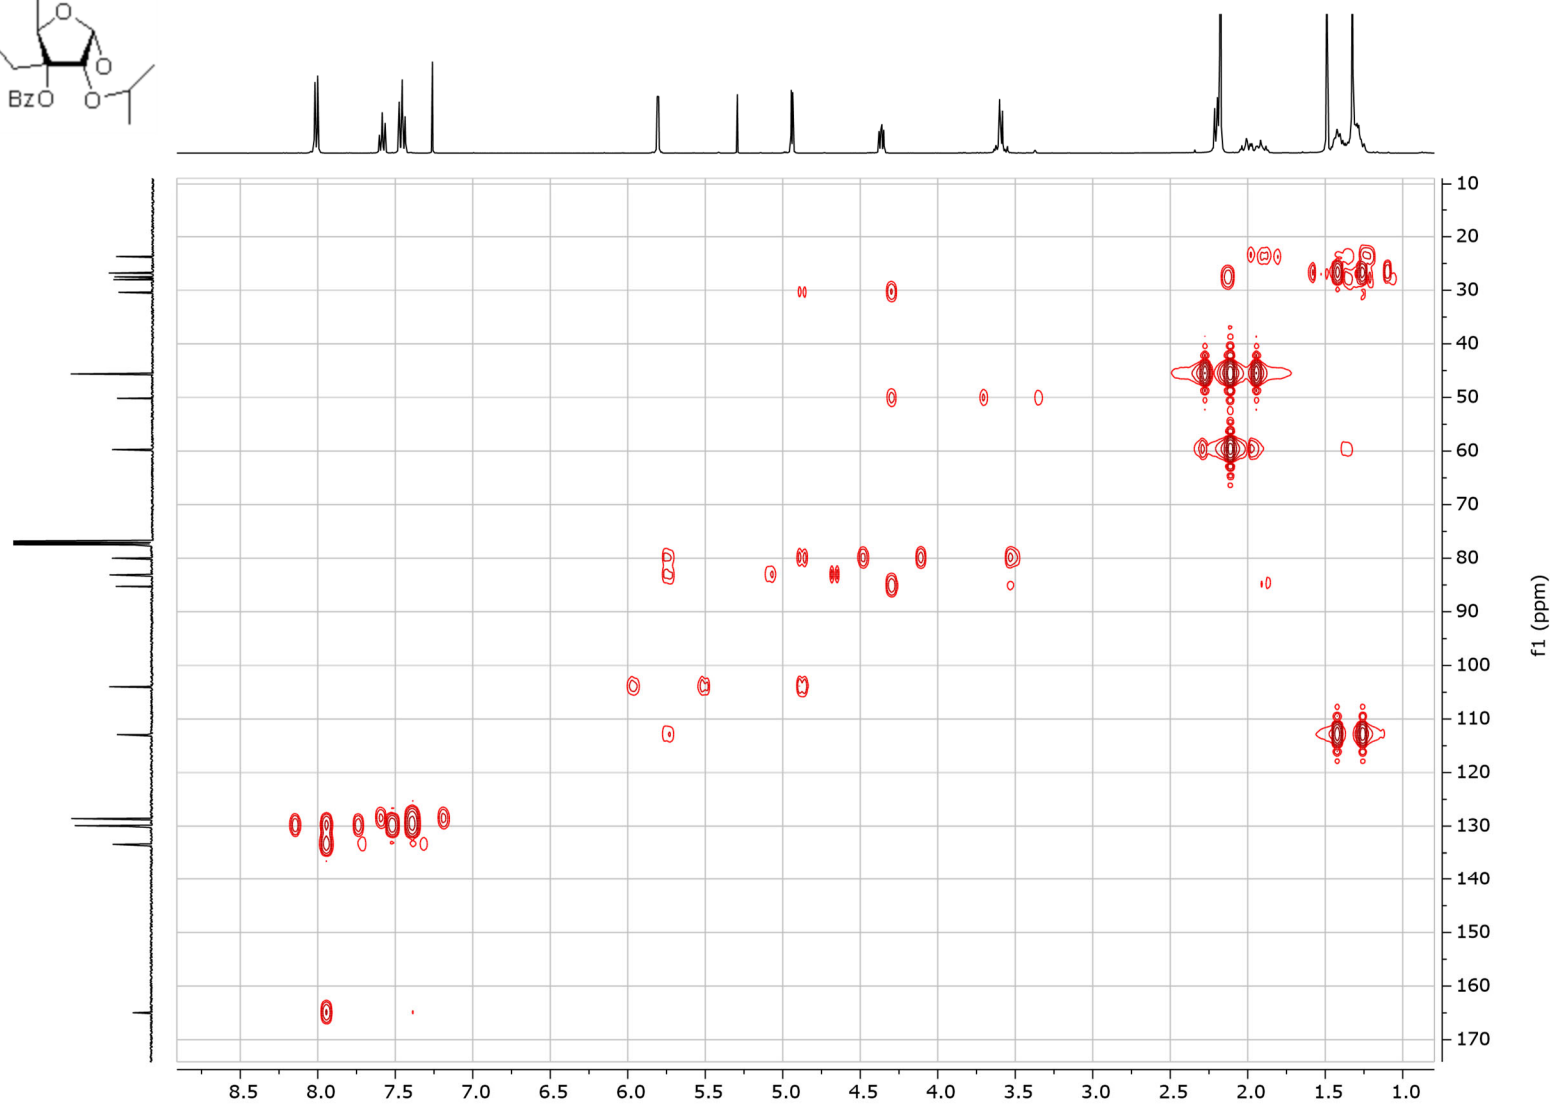

**5-Azido-5-deoxy-1,2-*O*-isopropylidene-3-*C*-(5-(dimethylamino)pentyl)-3-*O*-benzoyl- $\alpha$ -D-ribofuranose (16)**

[COSY, 400 MHz, CDCl<sub>3</sub>]

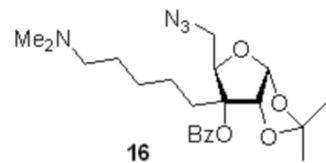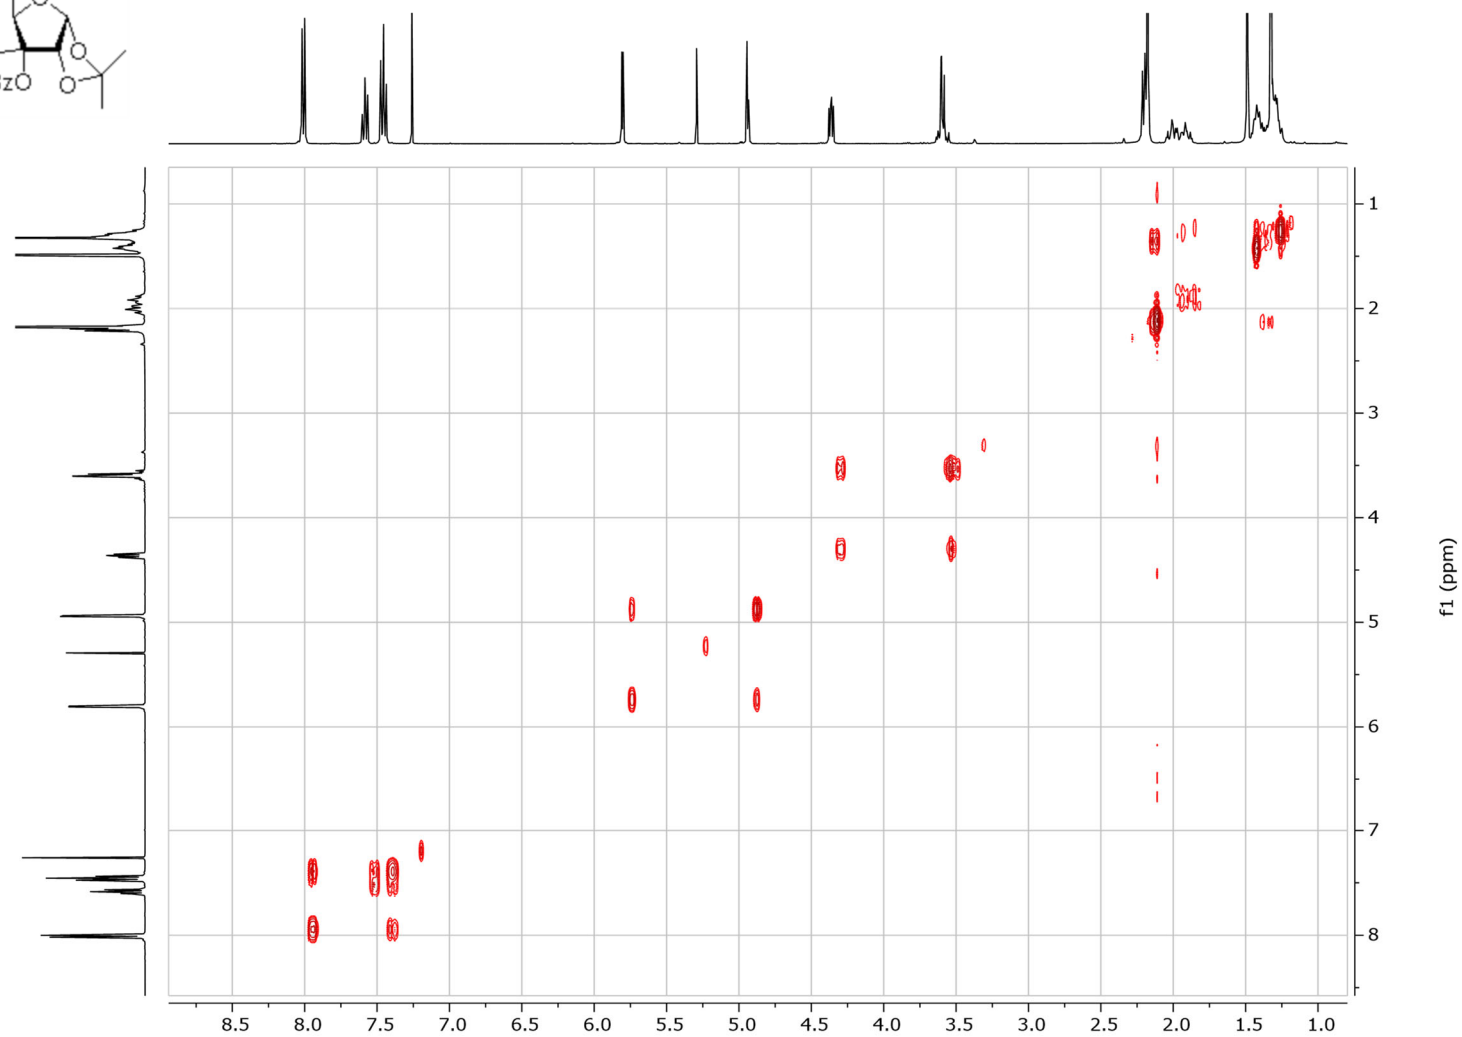

**1,2-Di-*O*-acetyl-5-azido-5-deoxy-3-*C*-(5-(dimethylamino)pentyl)-3-*O*-benzoyl- $\alpha/\beta$ -D-ribofuranose (17)**

[<sup>1</sup>H NMR, 400 MHz, CDCl<sub>3</sub>]

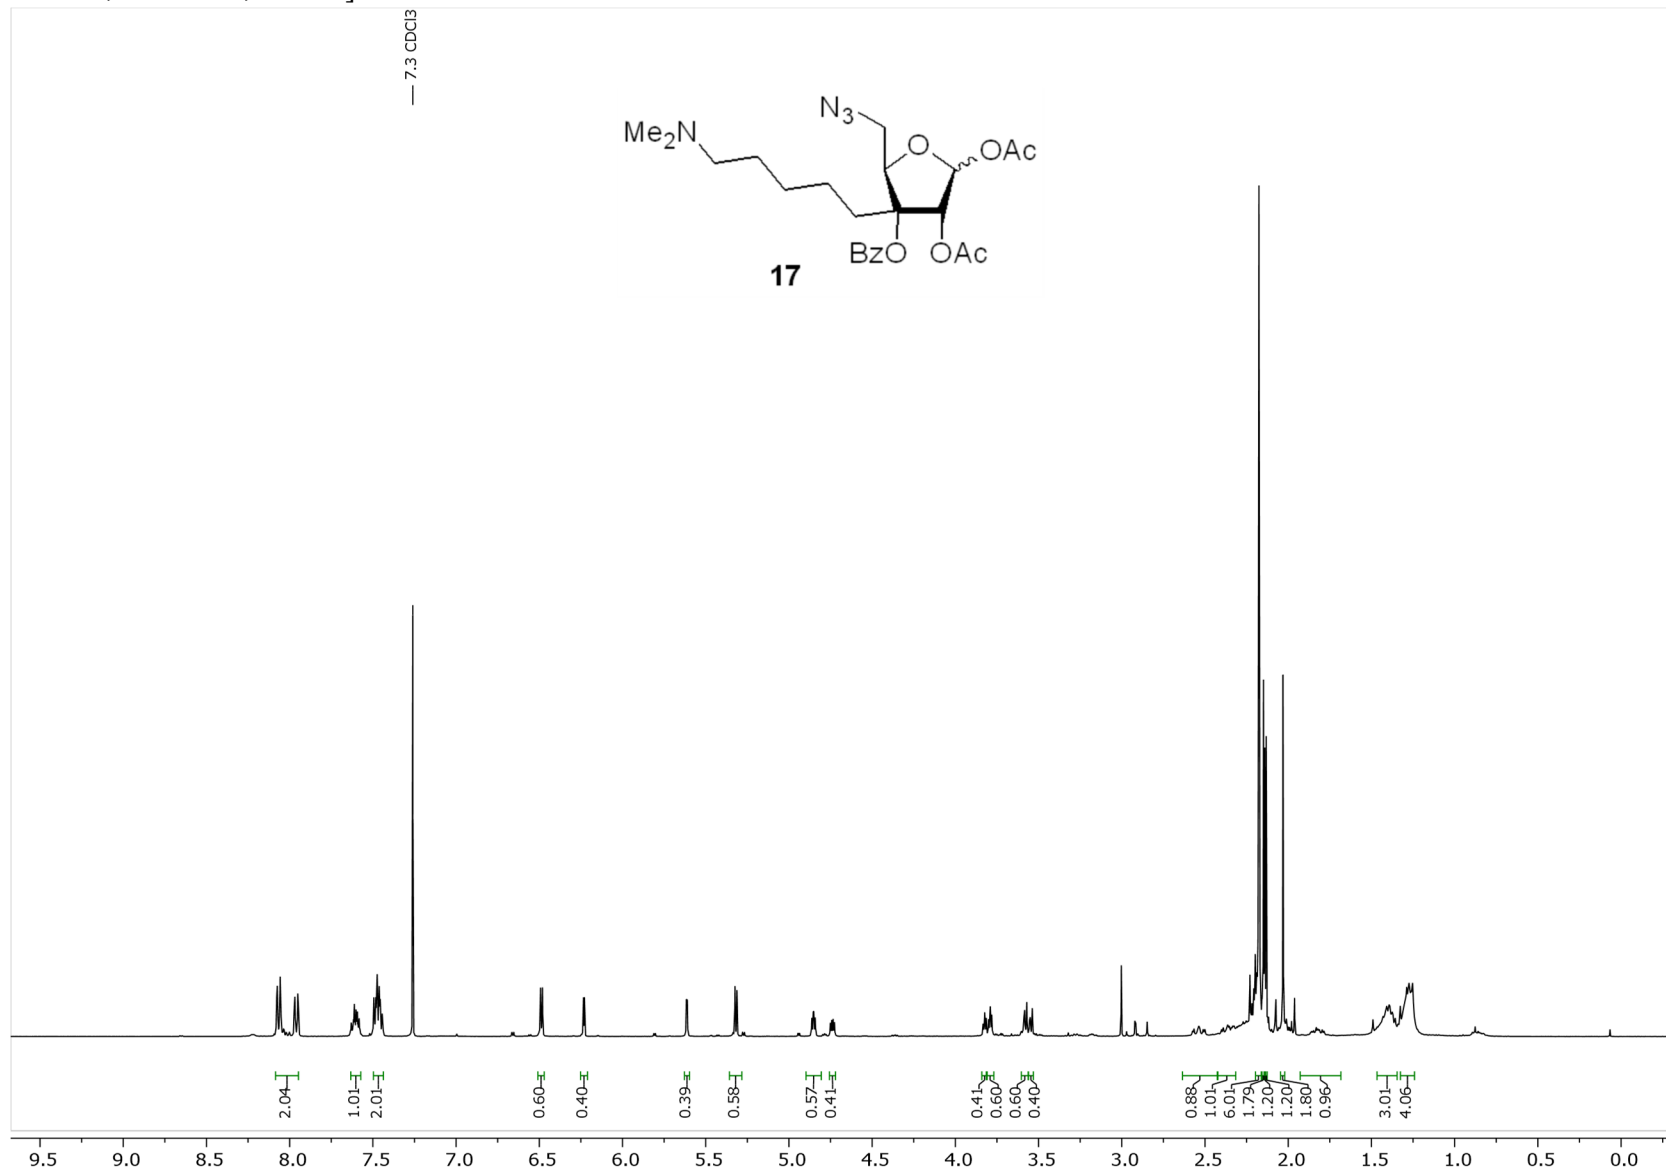

**1,2-Di-*O*-acetyl-5-azido-5-deoxy-3-*C*-(5-(dimethylamino)pentyl)-3-*O*-benzoyl- $\alpha/\beta$ -D-ribofuranose (17)**

[ $^{13}\text{C}$  NMR, 101 MHz,  $\text{CDCl}_3$ ]

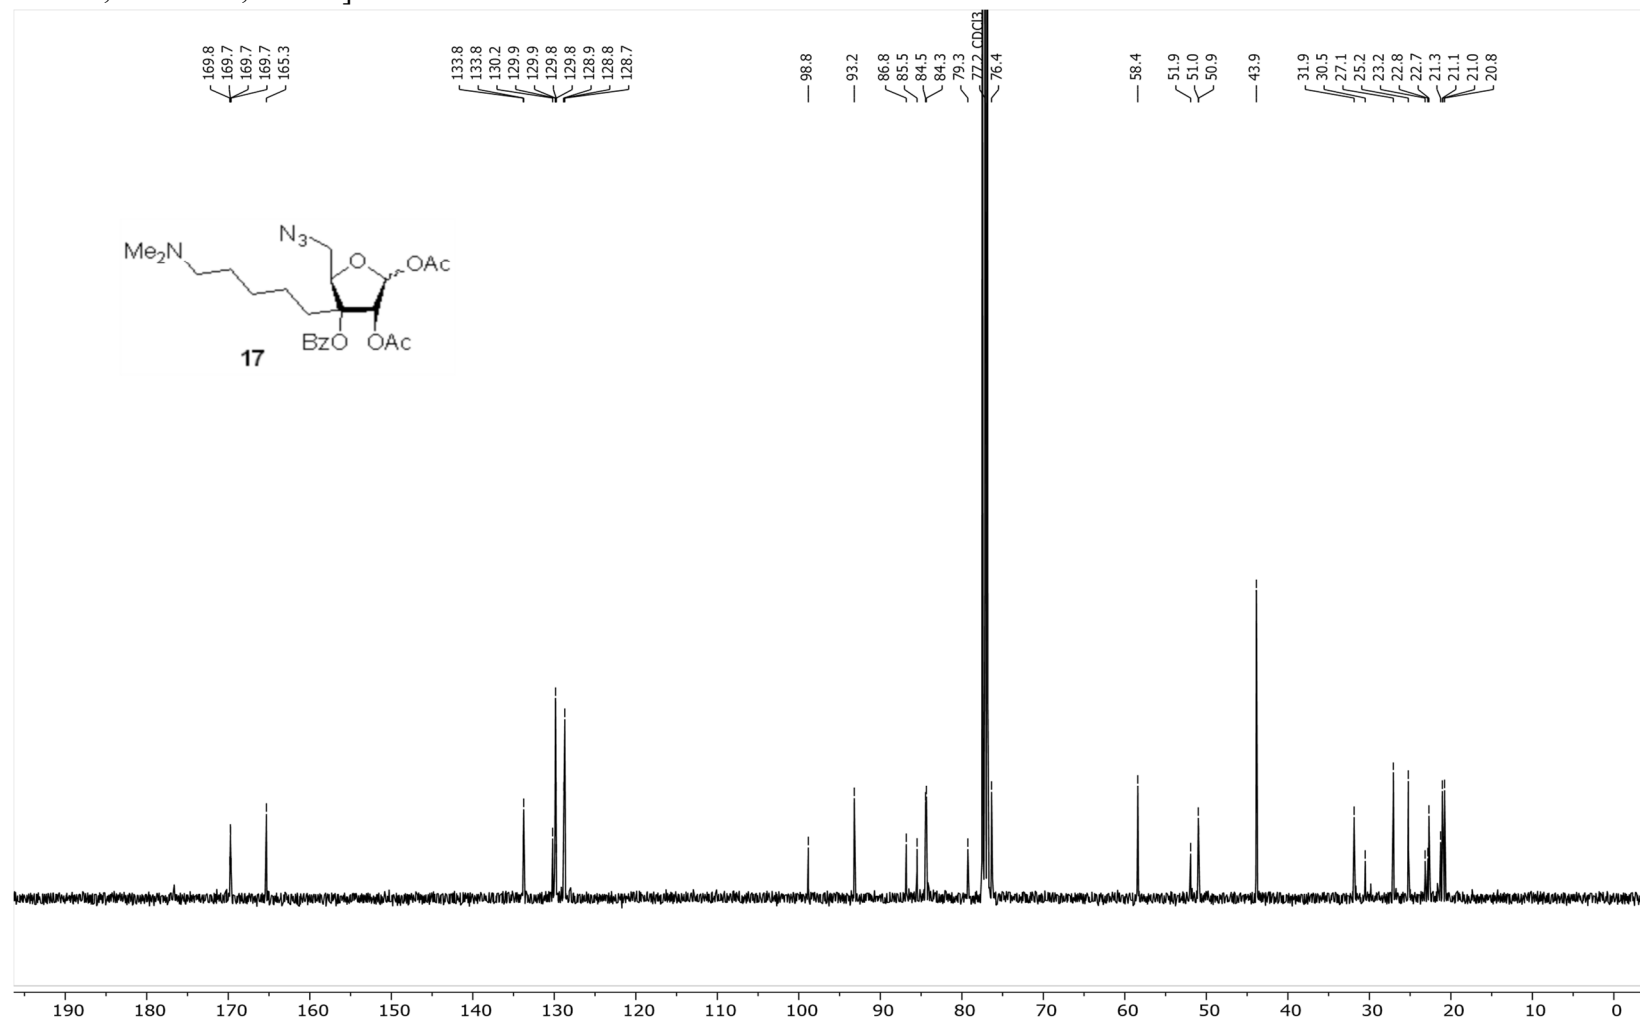

**5-*O*-[5'''-Azido-5'''-deoxy-2'''-*O*-acetyl-3-*C*-(5-(dimethylamino)pentyl)-3-*O*-benzoyl- $\alpha$ -D-ribofuranosyl]-6,2'',3'',6''-tetra-*O*-benzoyl-1,3,2',4''-tetraazido-1,3,2',4''-tetra(desamino)-6',7'-oxazolidino-apramycin trifluoroacetate (**19a**)**

[<sup>1</sup>H NMR, 400 MHz, CDCl<sub>3</sub>]

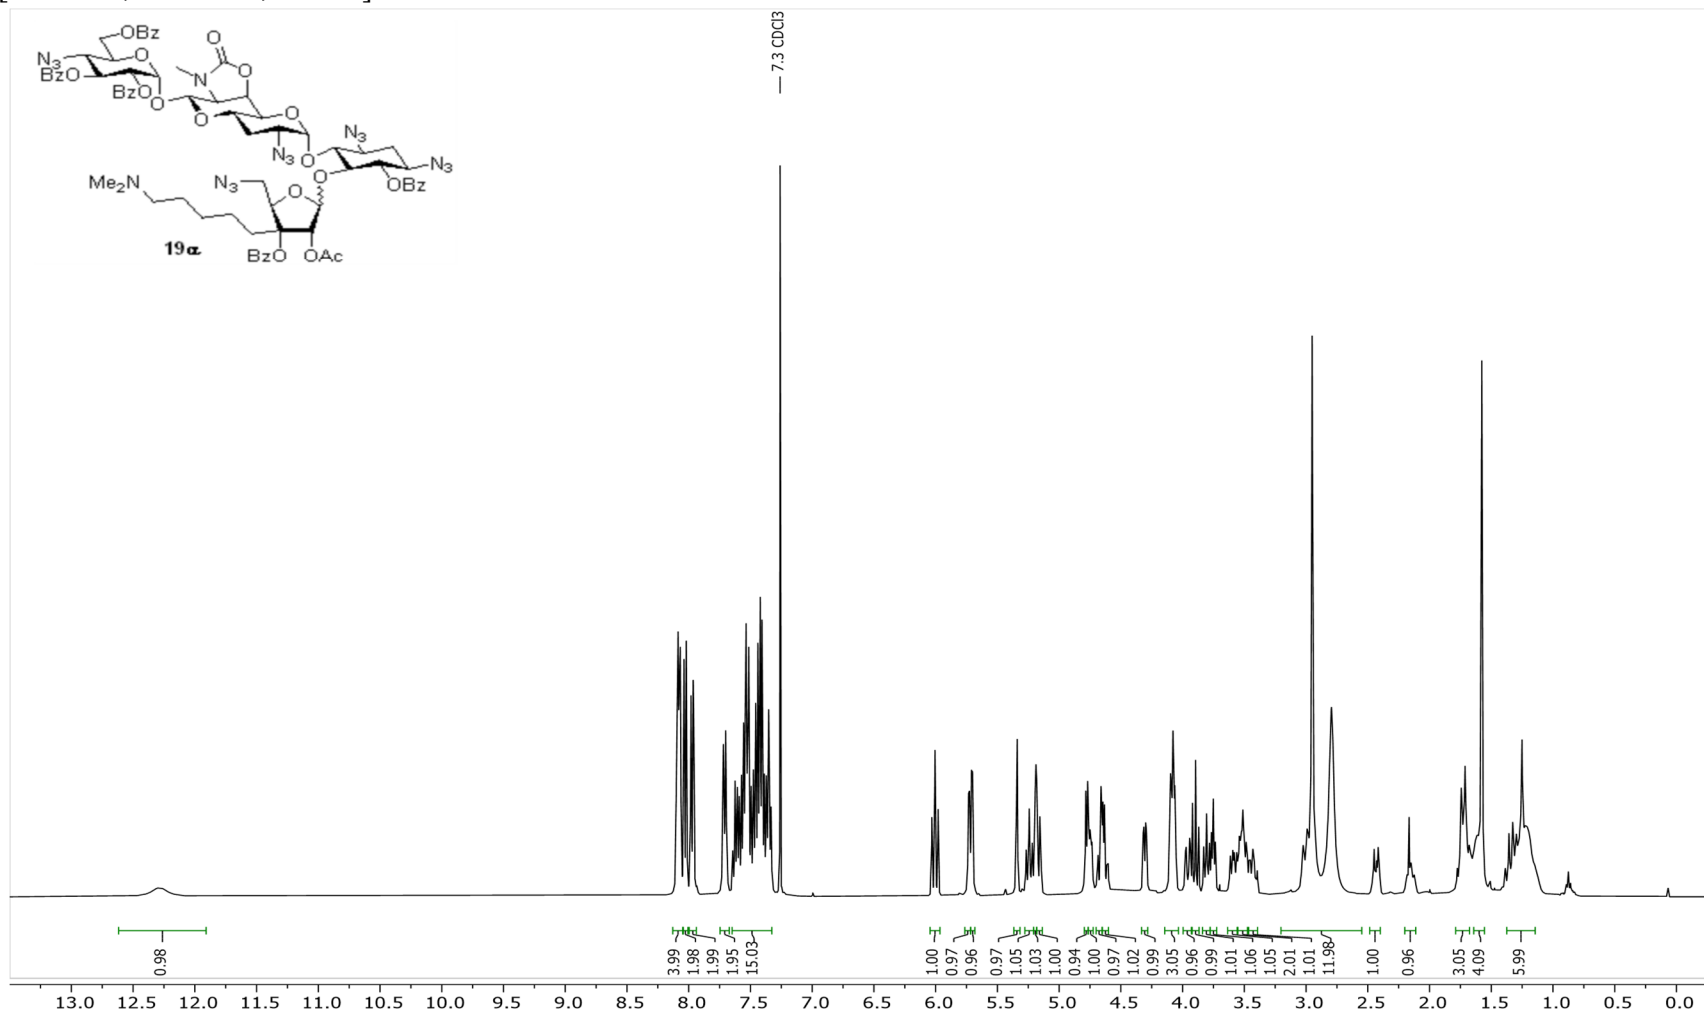

**5-*O*-[5'''-Azido-5'''-deoxy-2'''-*O*-acetyl-3-*C*-(5-(dimethylamino)pentyl)-3-*O*-benzoyl- $\alpha$ -D-ribofuranosyl]-6,2'',3'',6''-tetra-*O*-benzoyl-1,3,2',4''-tetraazido-1,3,2',4''-tetra(desamino)-6',7'-oxazolidino-apramycin trifluoroacetate (**19a**)**

[ $^{13}\text{C}$  NMR, 101 MHz,  $\text{CDCl}_3$ ]

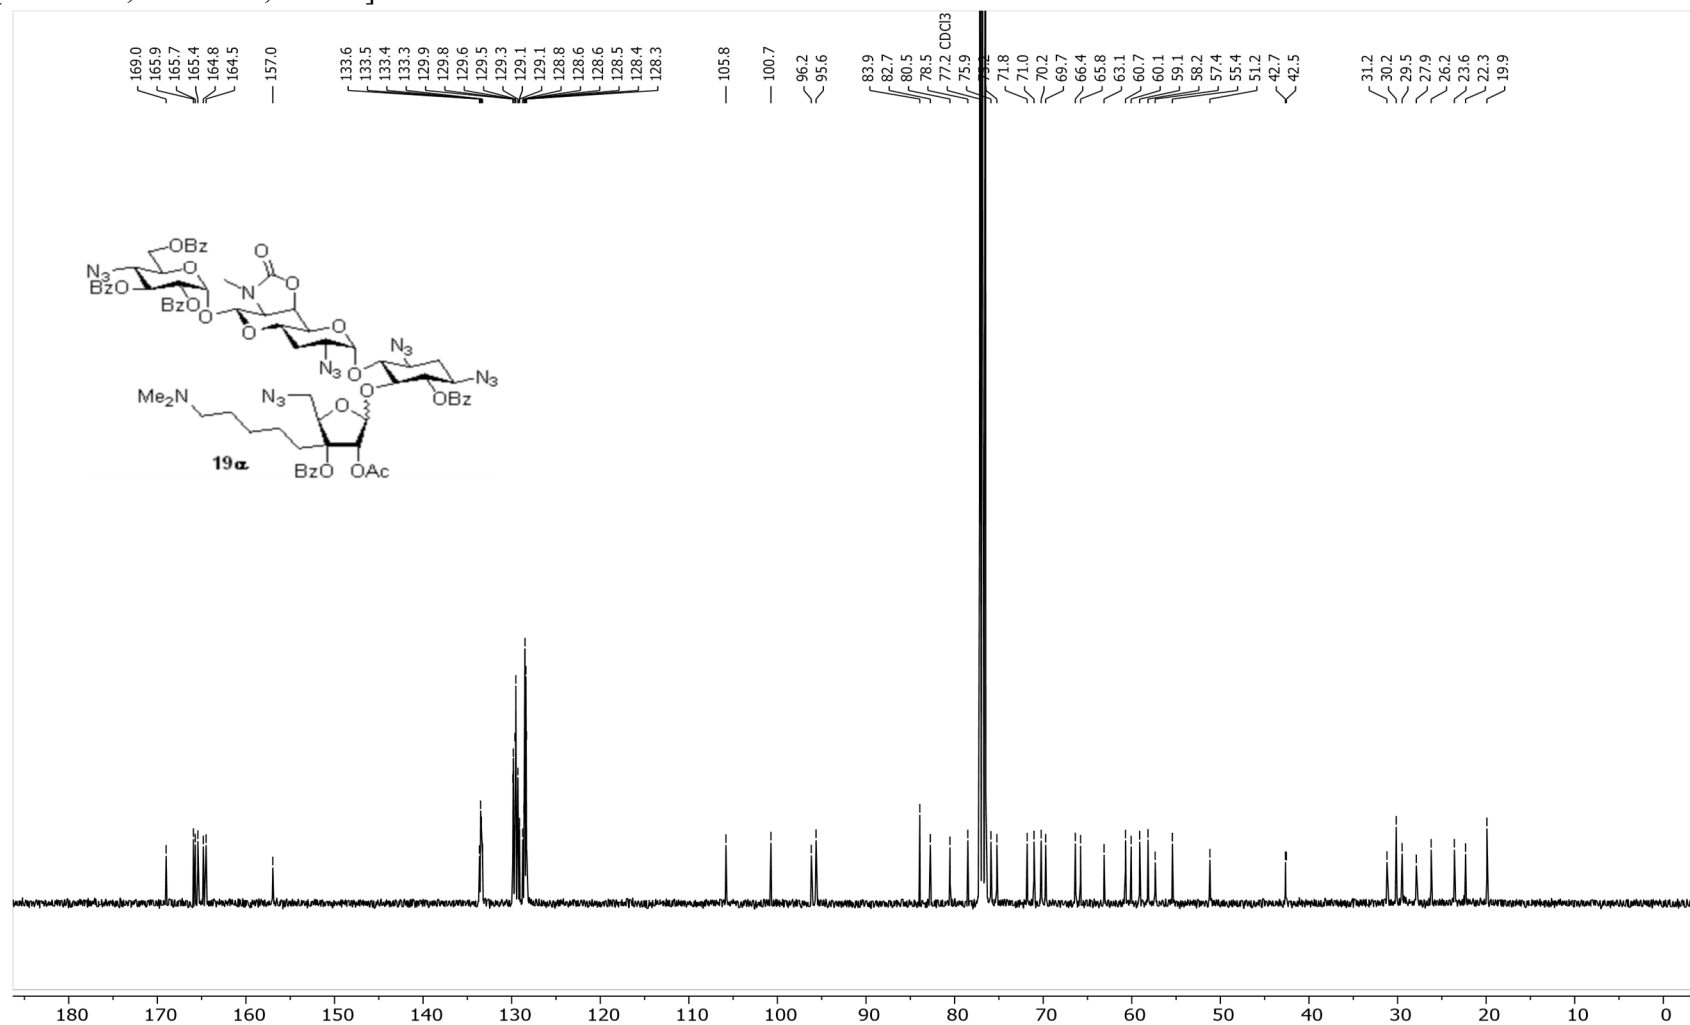

**5-*O*-[5'''-Azido-5'''-deoxy-2'''-*O*-acetyl-3-*C*-(5-(dimethylamino)pentyl)-3-*O*-benzoyl- $\alpha$ -D-ribofuranosyl]-6,2'',3'',6''-tetra-*O*-benzoyl-1,3,2',4''-tetraazido-1,3,2',4''-tetra(desamino)-6',7'-oxazolidino-apramycin trifluoroacetate (19 $\alpha$ )**  
 [HSQC, 400 MHz, CDCl<sub>3</sub>]

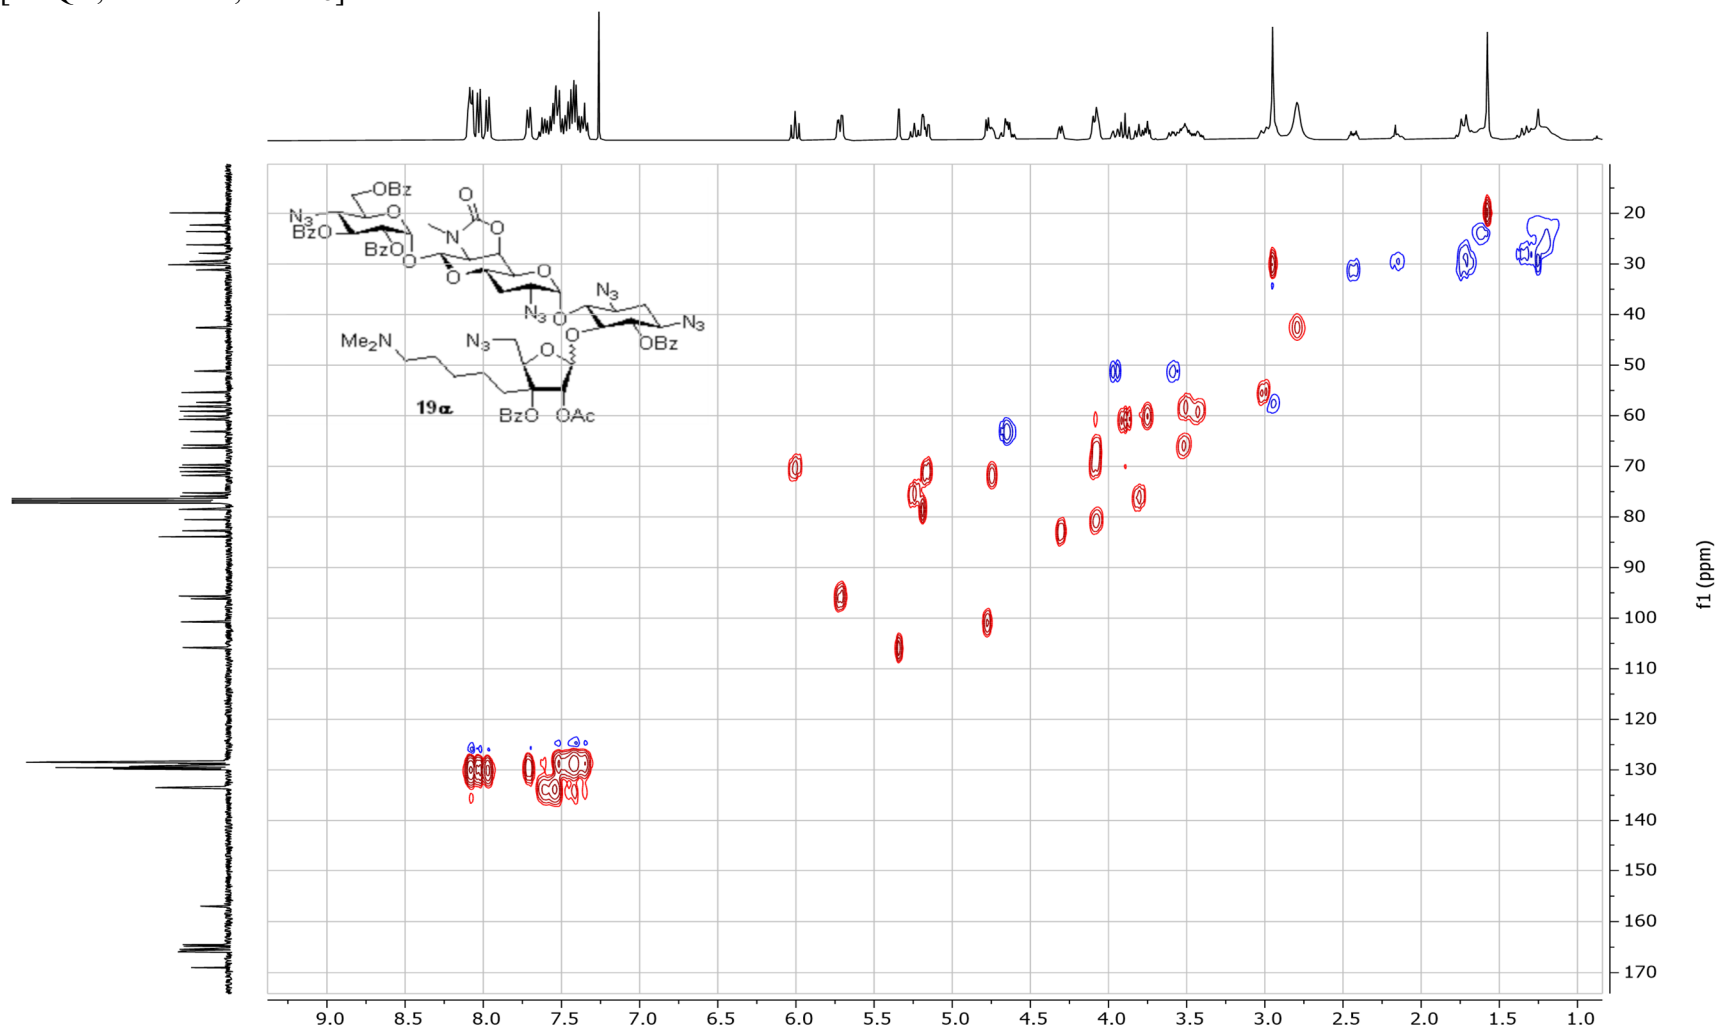

**5-*O*-[5'''-Azido-5'''-deoxy-2'''-*O*-acetyl-3-*C*-(5-(dimethylamino)pentyl)-3-*O*-benzoyl- $\alpha$ -D-ribofuranosyl]-6,2'',3'',6''-tetra-*O*-benzoyl-1,3,2',4''-tetraazido-1,3,2',4''-tetra(desamino)-6',7'-oxazolidino-apramycin trifluoroacetate (19a)**  
 [HMBC, 400 MHz, CDCl<sub>3</sub>]

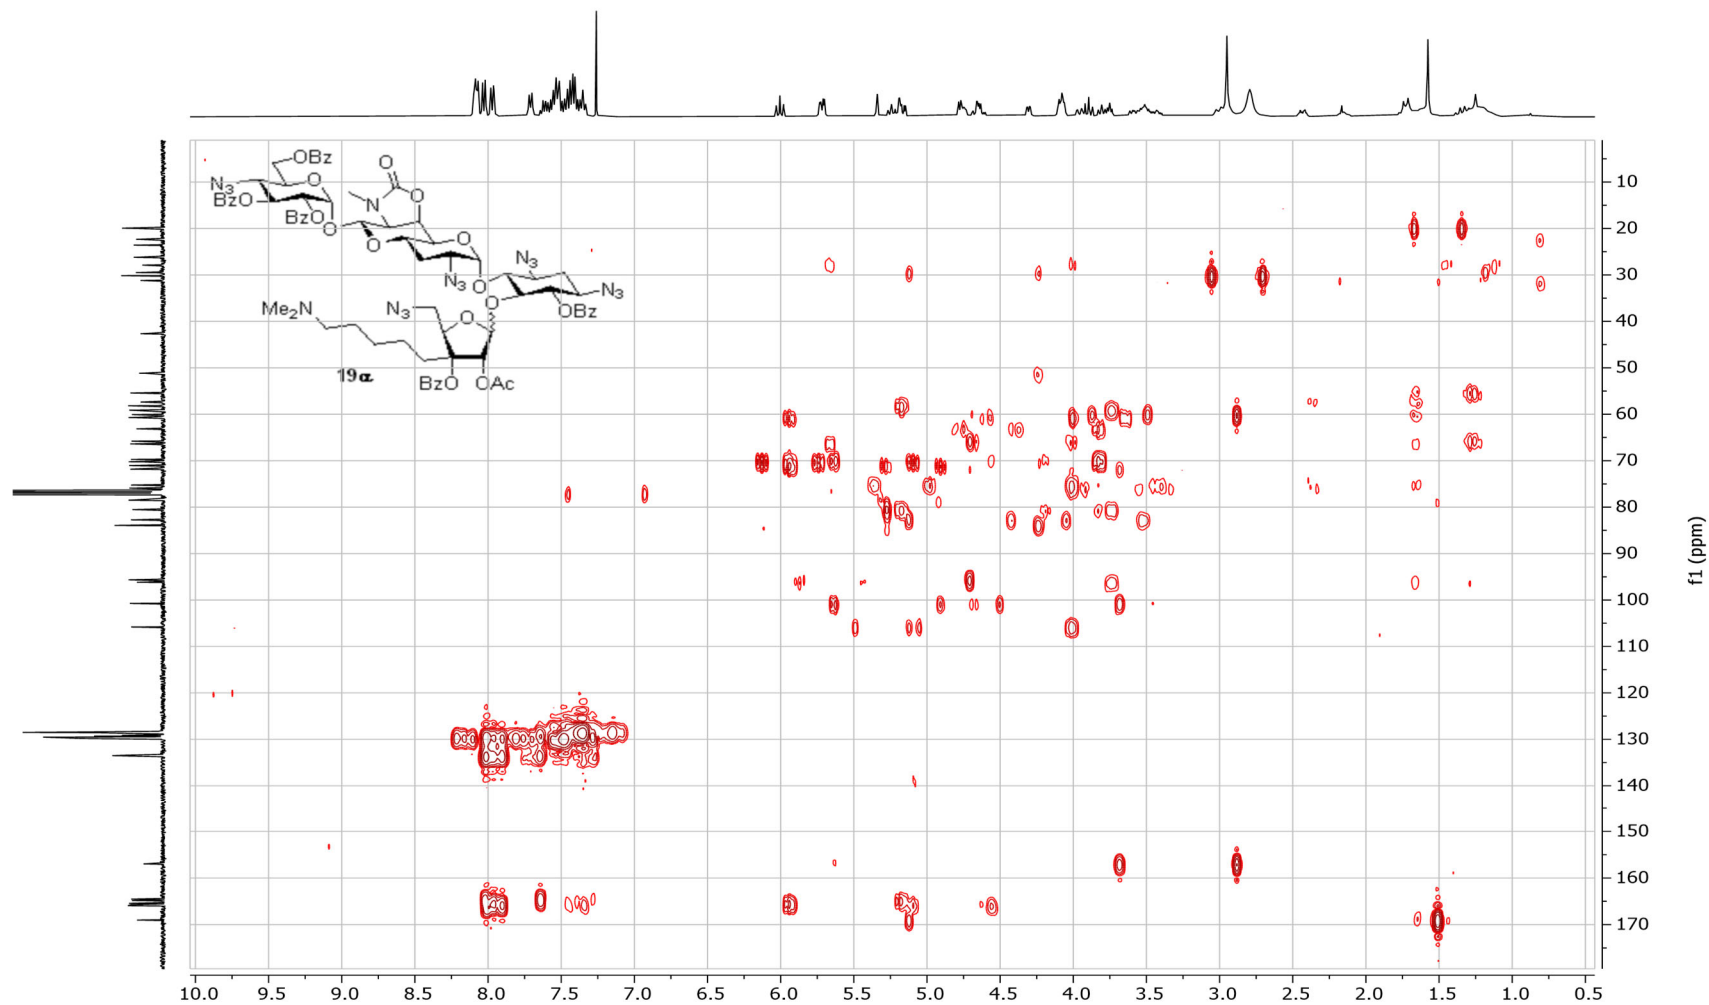



**5-*O*-[5'''-Azido-5'''-deoxy-2'''-*O*-acetyl-3-*C*-(5-(dimethylamino)pentyl)-3-*O*-benzoyl- $\alpha$ -D-ribofuranosyl]-6,2'',3'',6''-tetra-*O*-benzoyl-1,3,2',4''-tetraazido-1,3,2',4''-tetra(desamino)-6',7'-oxazolidino-apramycin trifluoroacetate (19a)**  
 [COSY, 400 MHz, CDCl<sub>3</sub>]

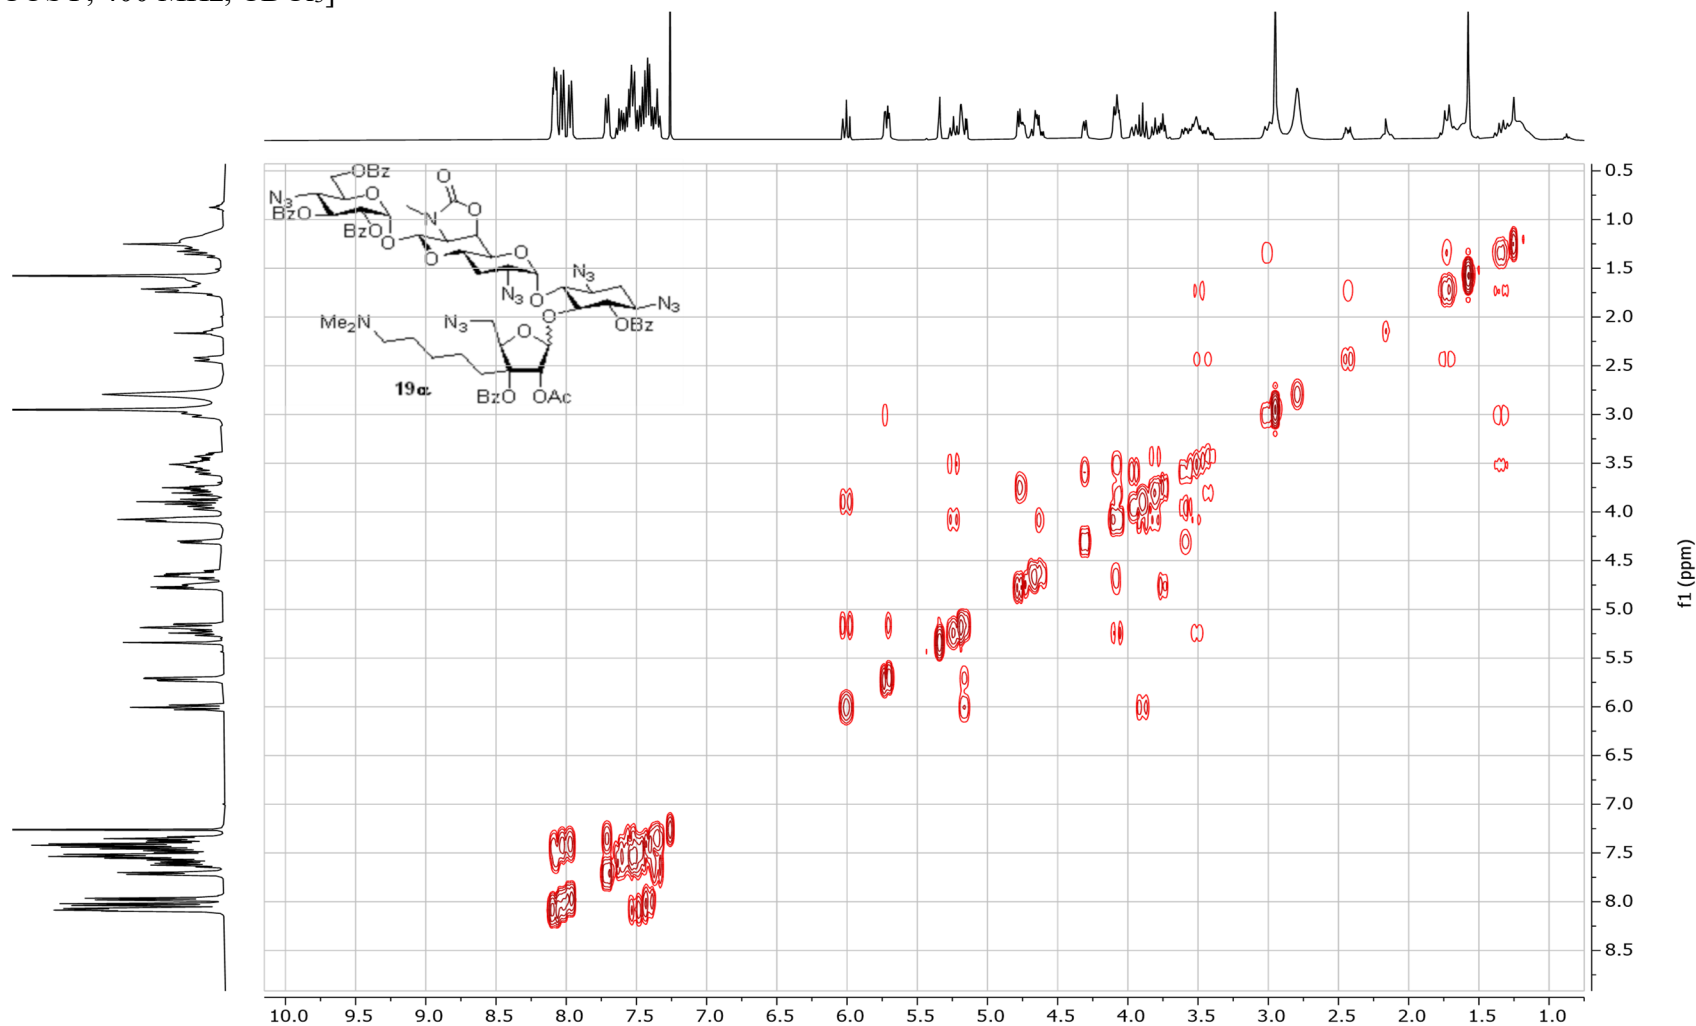

**5-*O*-[5'''-Azido-5'''-deoxy-2'''-*O*-acetyl-3-*C*-(5-(dimethylamino)pentyl)-3-*O*-benzoyl- $\beta$ -D-ribofuranosyl]-6,2'',3'',6''-tetra-*O*-benzoyl-1,3,2',4''-tetraazido-1,3,2',4''-tetra(desamino)-6',7'-oxazolidino-apramycin trifluoroacetate (**19 $\beta$** )**

[<sup>1</sup>H NMR, 400 MHz, CDCl<sub>3</sub>]

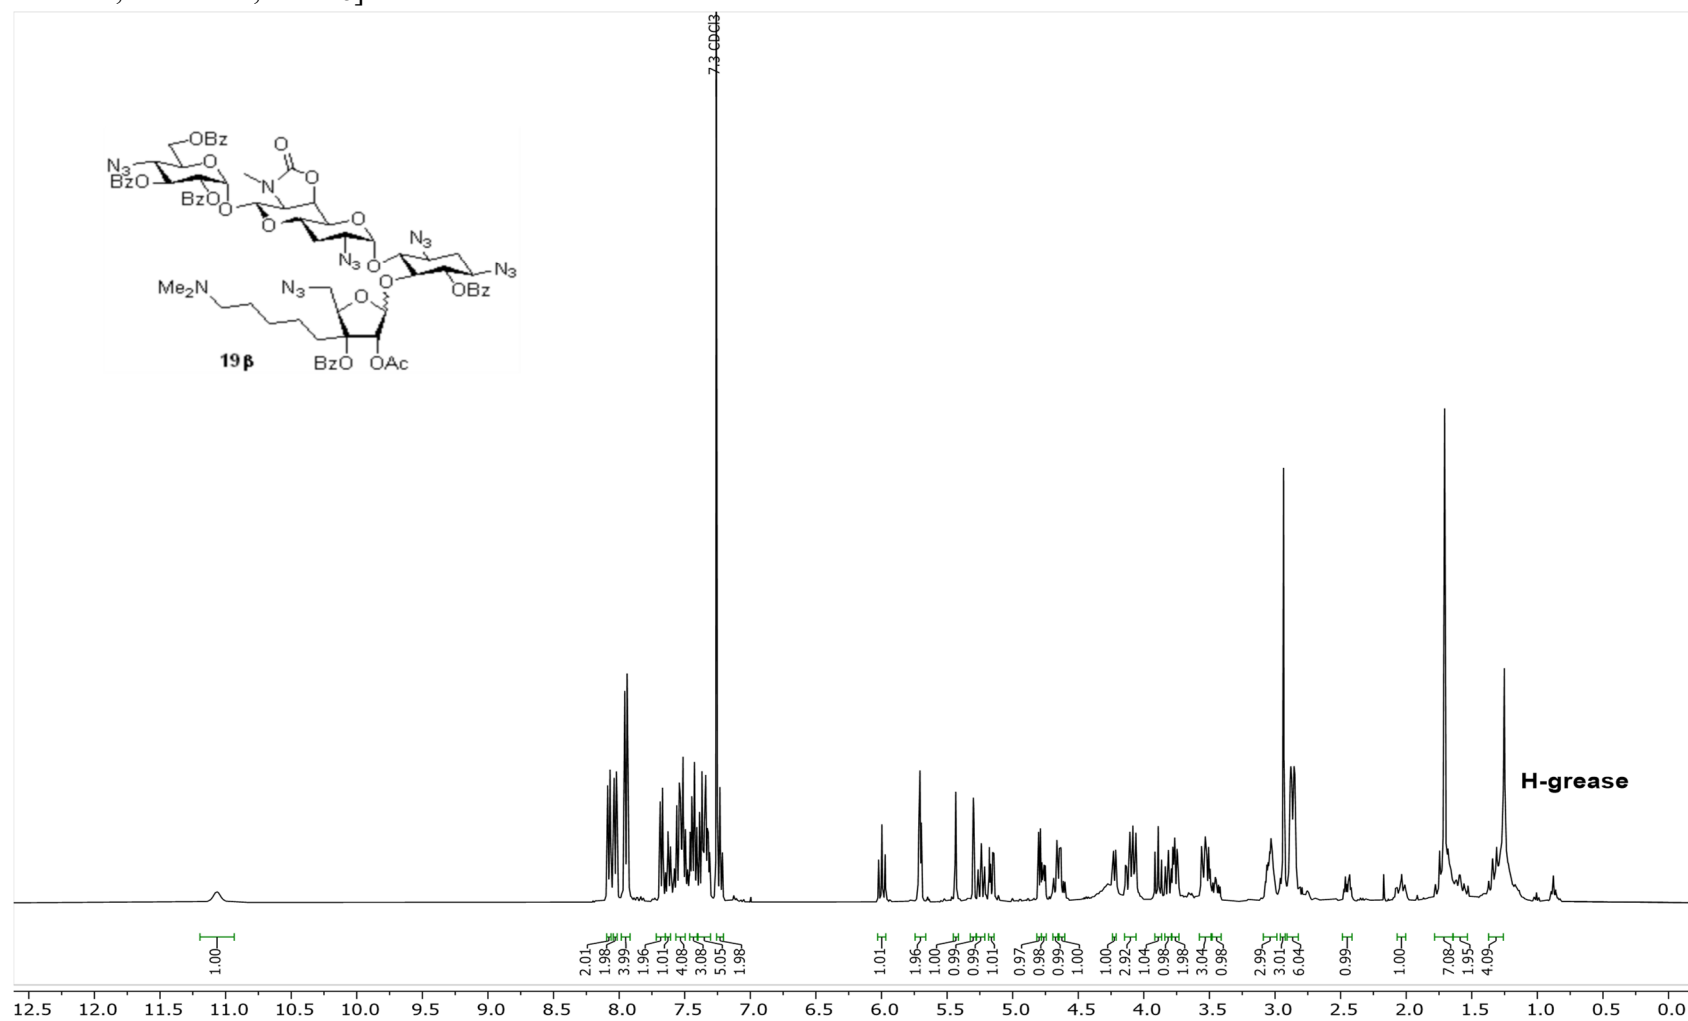

**5-*O*-[5'''-Azido-5'''-deoxy-2'''-*O*-acetyl-3-*C*-(5-(dimethylamino)pentyl)-3-*O*-benzoyl- $\beta$ -D-ribofuranosyl]-6,2'',3'',6''-tetra-*O*-benzoyl-1,3,2',4''-tetraazido-1,3,2',4''-tetra(desamino)-6',7'-oxazolidino-apramycin trifluoroacetate (19 $\beta$ )**

[<sup>13</sup>C NMR, 101 MHz, CDCl<sub>3</sub>]

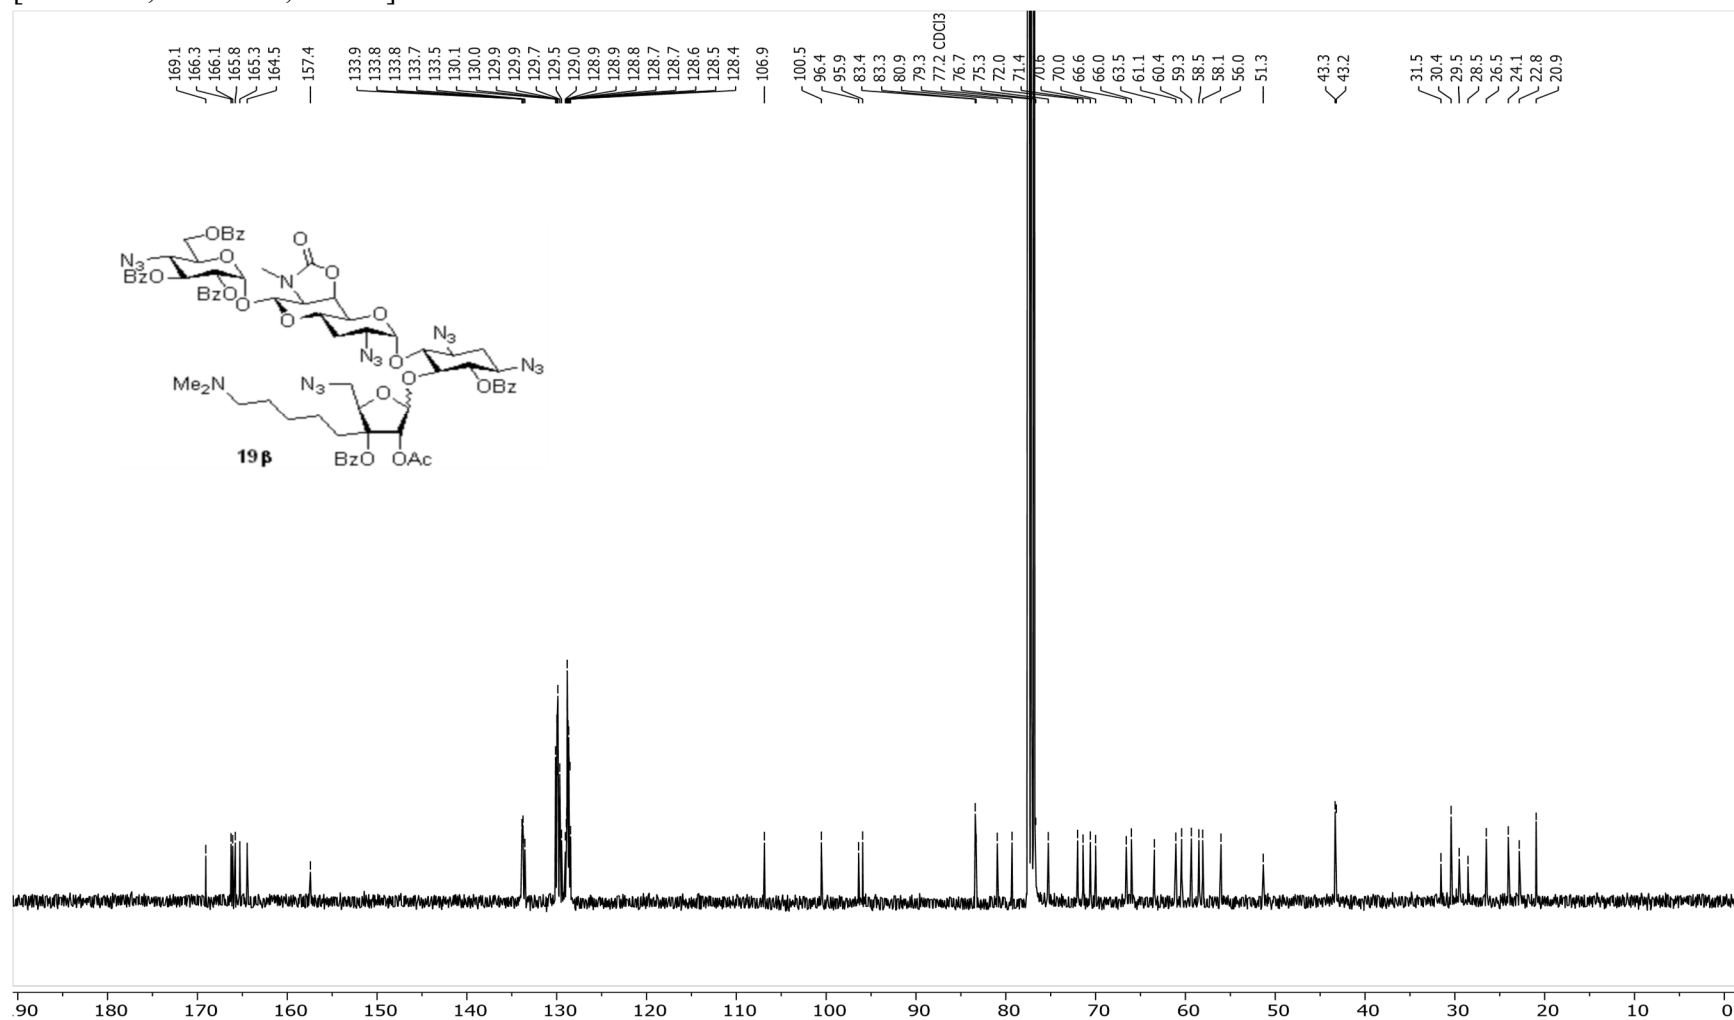

**5-*O*-[5'''-Azido-5'''-deoxy-2'''-*O*-acetyl-3-*C*-(5-(dimethylamino)pentyl)-3-*O*-benzoyl- $\beta$ -D-ribofuranosyl]-6,2'',3'',6''-tetra-*O*-benzoyl-1,3,2',4''-tetraazido-1,3,2',4''-tetra(desamino)-6',7'-oxazolidino-apramycin trifluoroacetate (19 $\beta$ )**  
 [HSQC, 400 MHz, CDCl<sub>3</sub>]

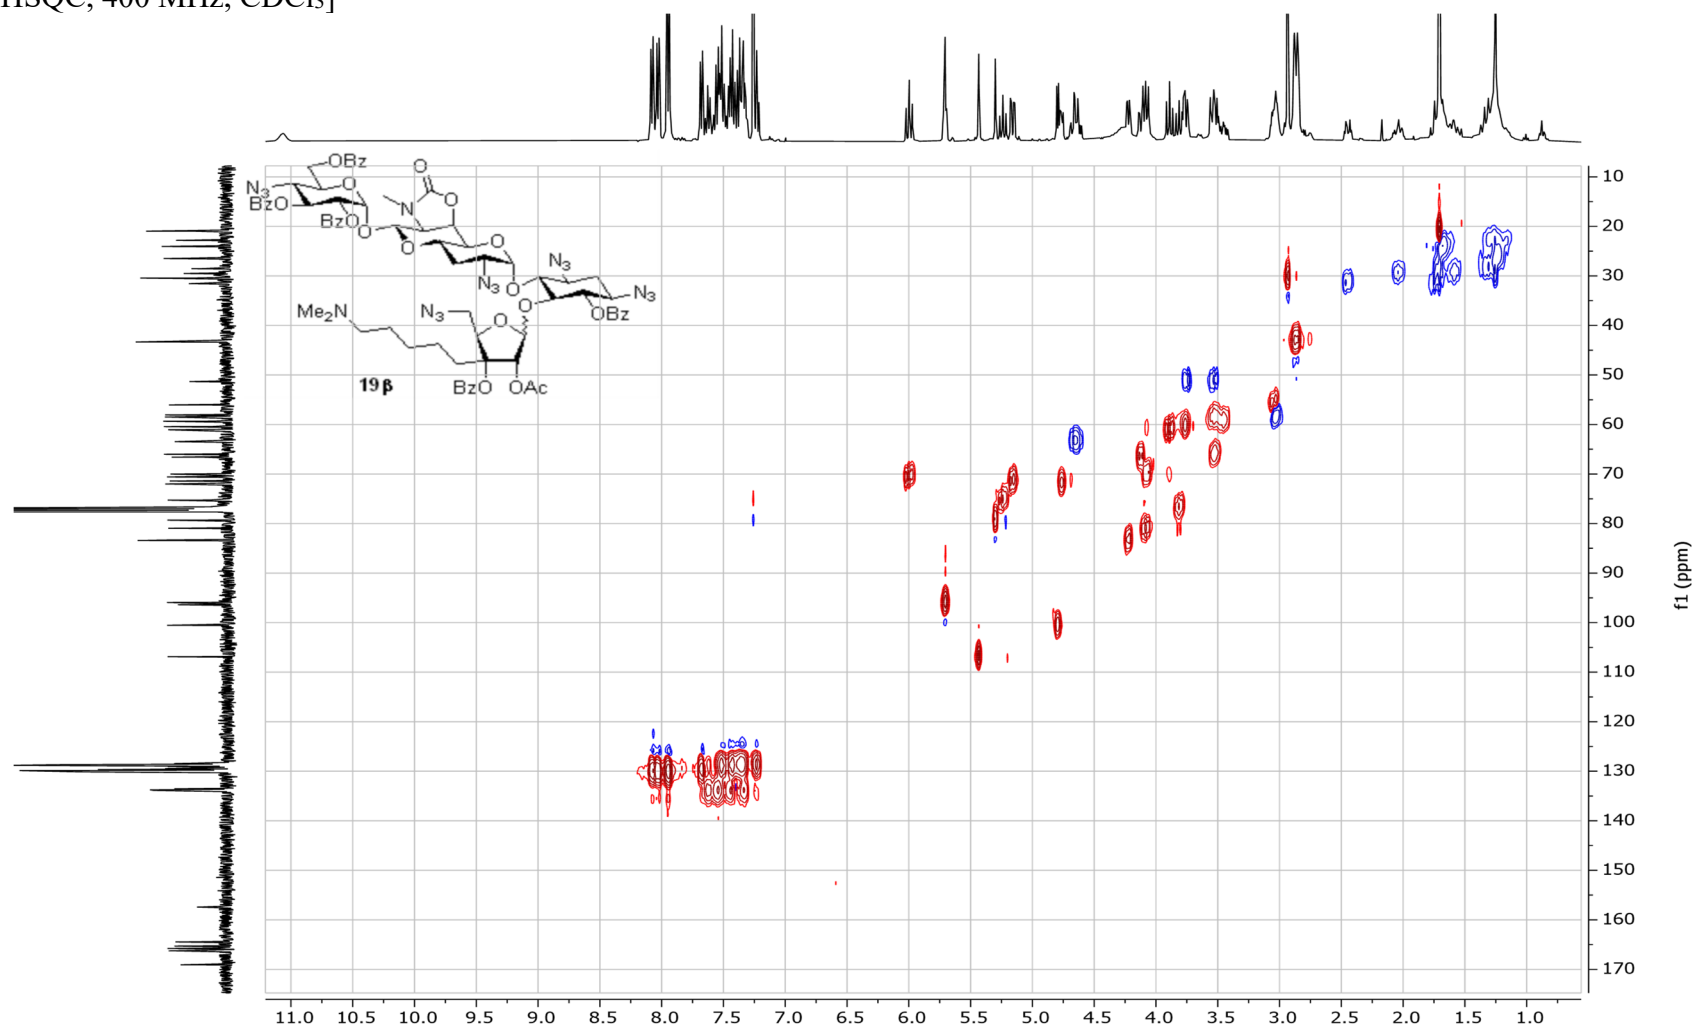

**5-*O*-[5'''-Azido-5'''-deoxy-2'''-*O*-acetyl-3-*C*-(5-(dimethylamino)pentyl)-3-*O*-benzoyl- $\beta$ -D-ribofuranosyl]-6,2'',3'',6''-tetra-*O*-benzoyl-1,3,2',4''-tetraazido-1,3,2',4''-tetra(desamino)-6',7'-oxazolidino-apramycin trifluoroacetate (19 $\beta$ )**  
 [HMBC, 400 MHz, CDCl<sub>3</sub>]

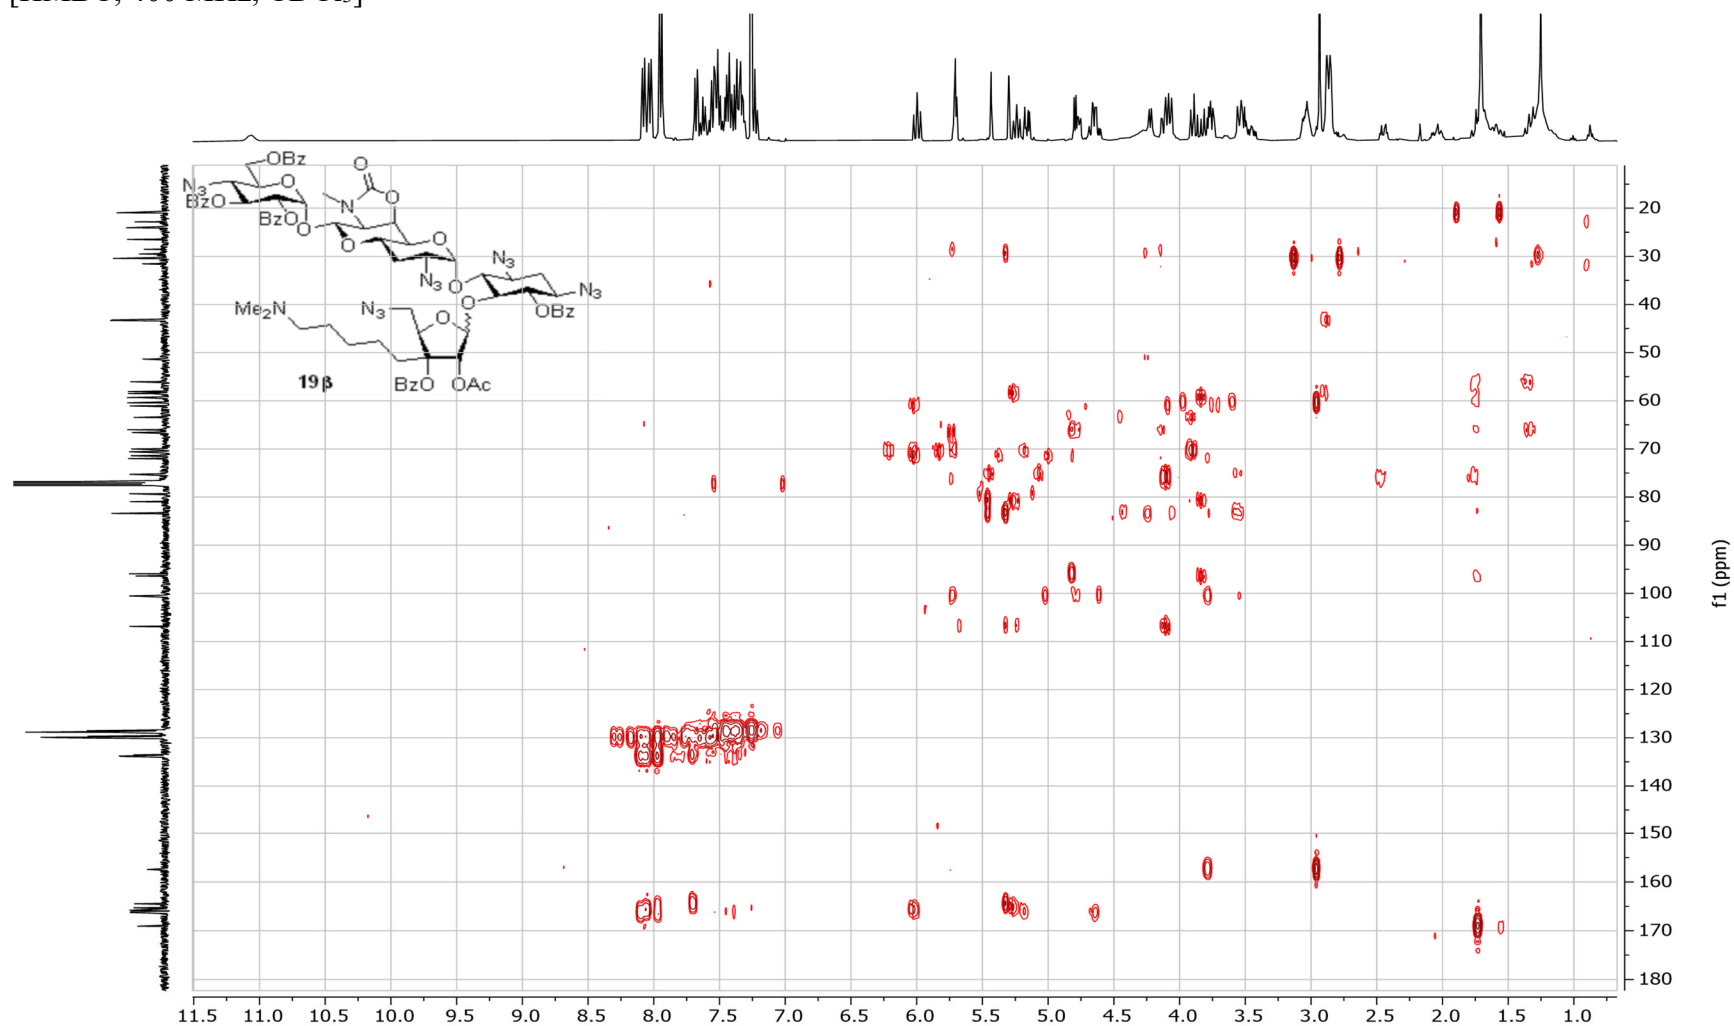

**5-*O*-[5'''-Azido-5'''-deoxy-2'''-*O*-acetyl-3-*C*-(5-(dimethylamino)pentyl)-3-*O*-benzoyl- $\beta$ -D-ribofuranosyl]-6,2'',3'',6''-tetra-*O*-benzoyl-1,3,2',4''-tetraazido-1,3,2',4''-tetra(desamino)-6',7'-oxazolidino-apramycin trifluoroacetate (19 $\beta$ )**  
 [COSY, 400 MHz, CDCl<sub>3</sub>]

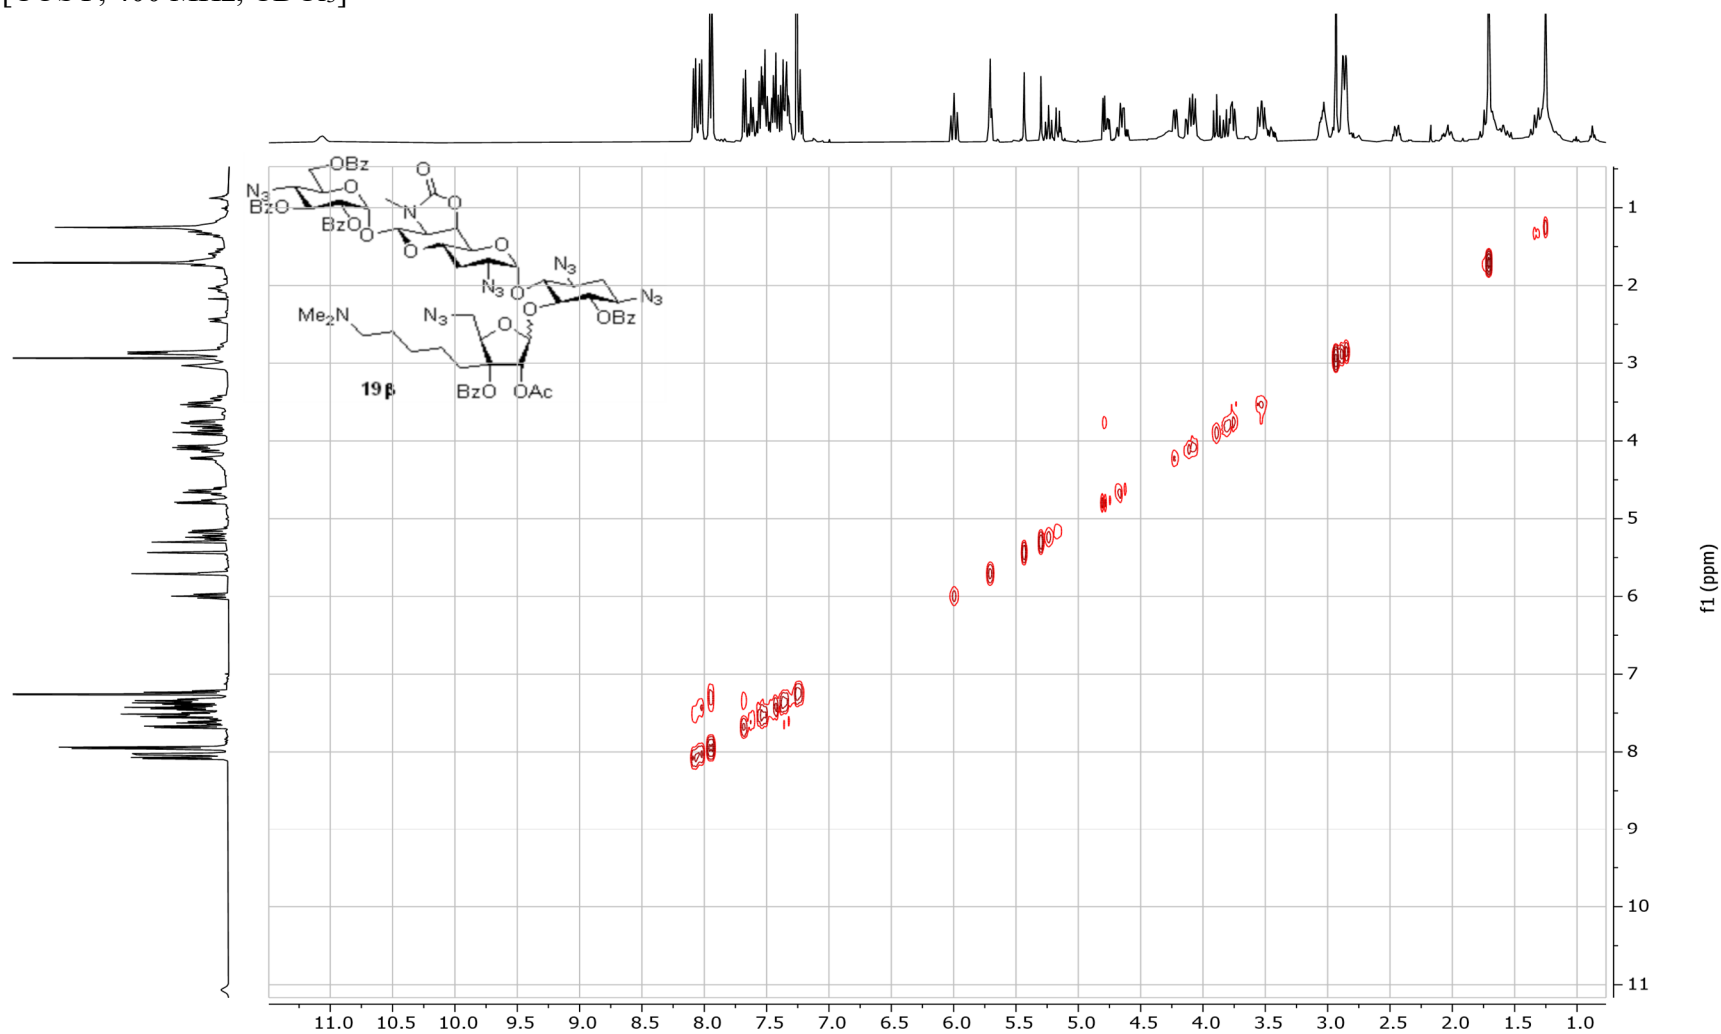

**5-*O*-[5'''-Amino-5'''-deoxy-3-*C*-(5-(dimethylamino)pentyl)- $\beta$ -D-ribofuranosyl]-apramycin heptaacetate (5)**

[<sup>1</sup>H NMR, 600 MHz, D<sub>2</sub>O]

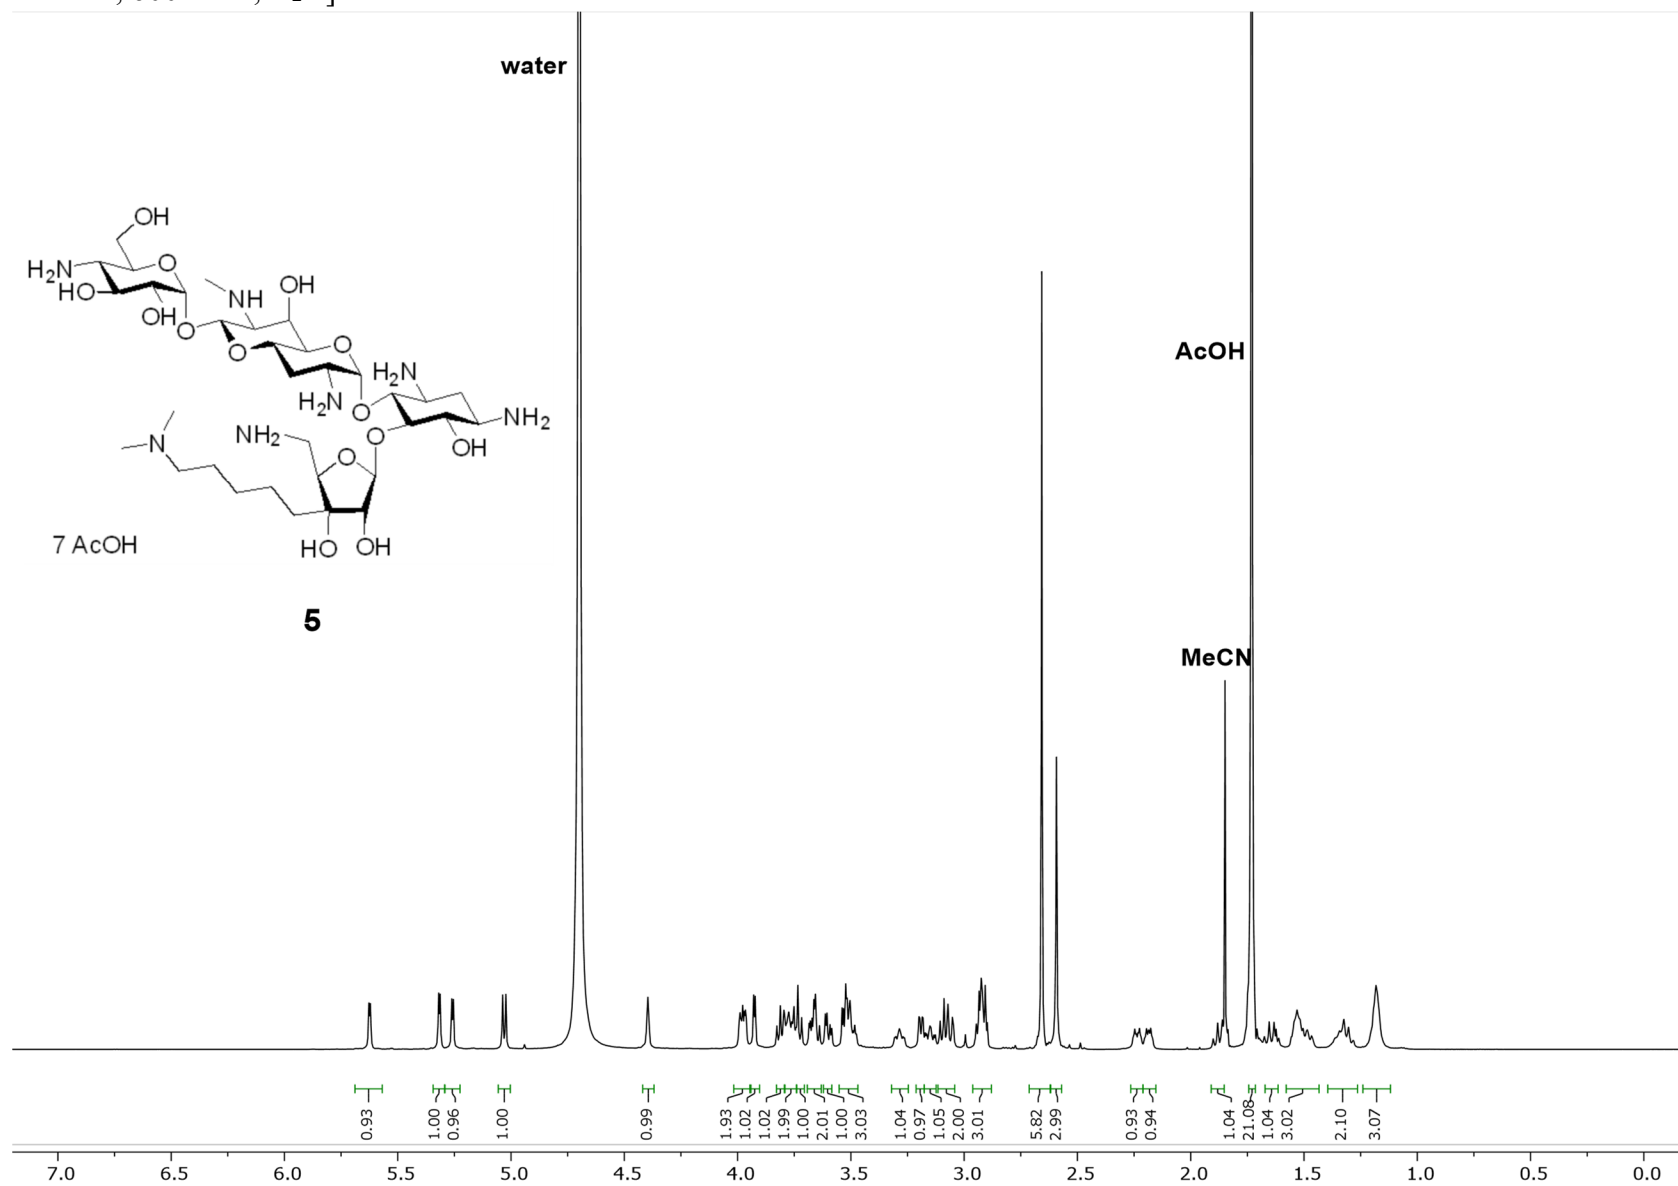

**5-*O*-[5'''-Amino-5'''-deoxy-3-*C*-(5-(dimethylamino)pentyl)- $\beta$ -D-ribofuranosyl]-apramycin heptaacetate (5)**

[<sup>13</sup>C NMR, 125 MHz, D<sub>2</sub>O]

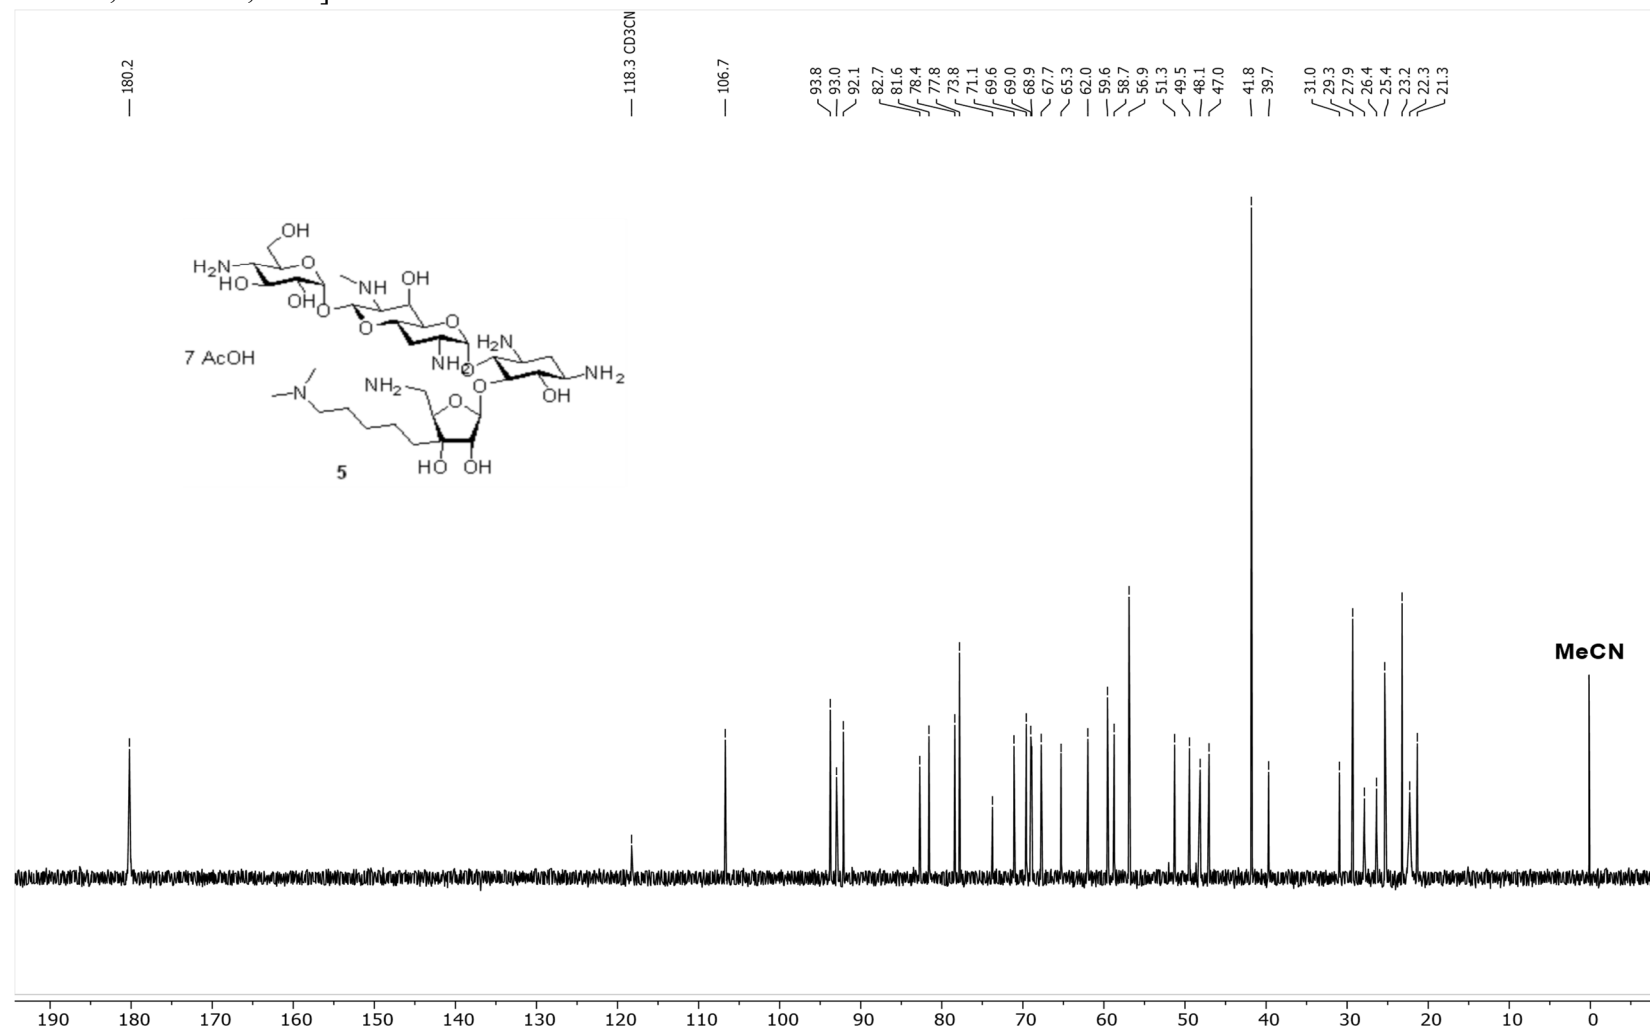



**5-*O*-[5'''-Amino-5'''-deoxy-3-*C*-(5-(dimethylamino)pentyl)- $\beta$ -D-ribofuranosyl]-apramycin heptaacetate (5)**

[HSQC, 600 MHz, D<sub>2</sub>O]

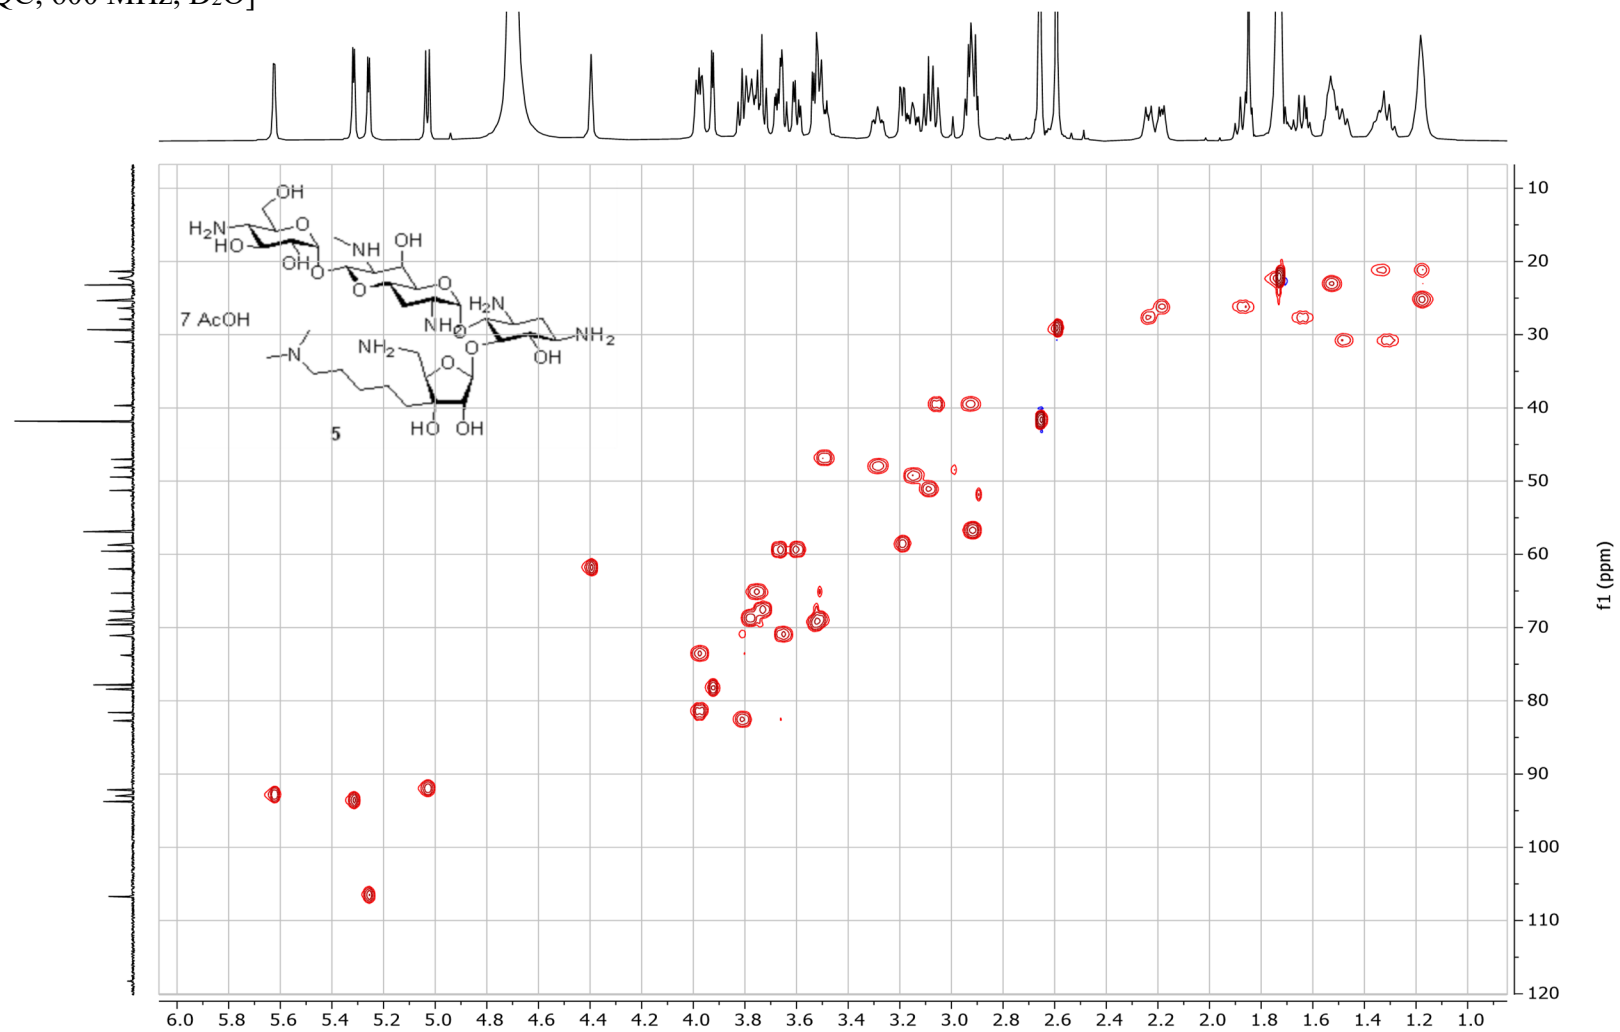

**5-*O*-[5'''-Amino-5'''-deoxy-3-*C*-(5-(dimethylamino)pentyl)- $\beta$ -D-ribofuranosyl]-apramycin heptaacetate (5)**  
 [HMBC, 600 MHz, D<sub>2</sub>O]

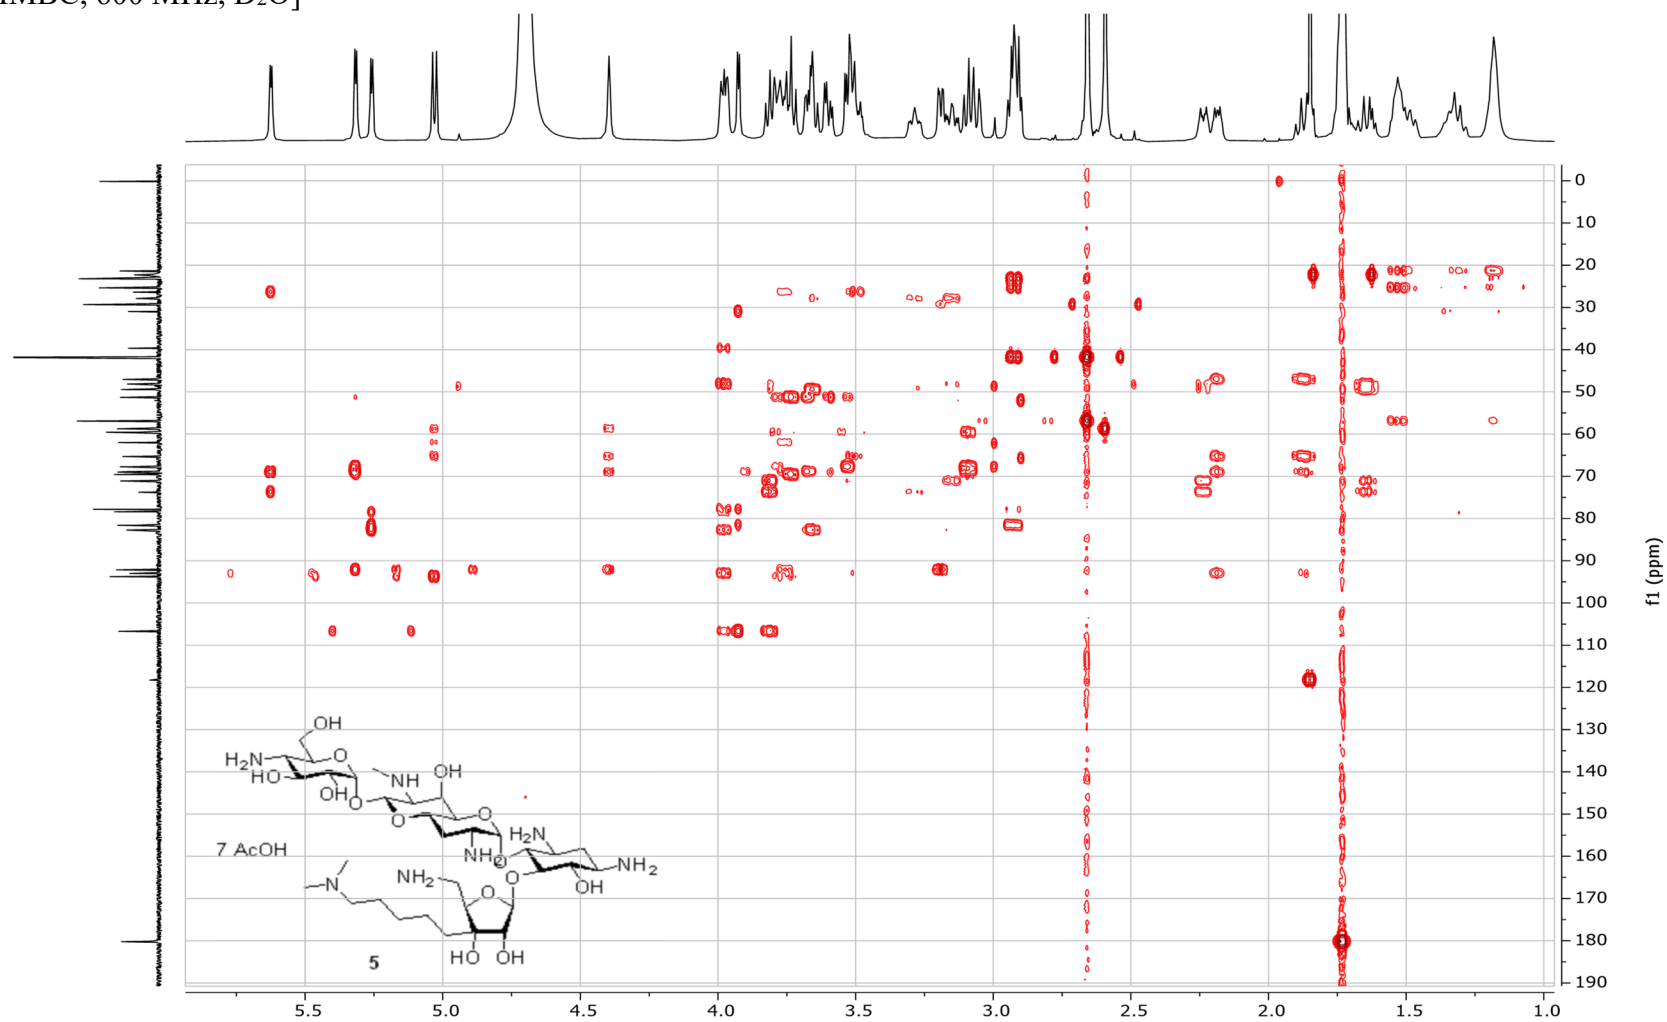

**5-O-[5'''-Amino-5'''-deoxy-3-C-(5-(dimethylamino)pentyl)- $\beta$ -D-ribofuranosyl]-apramycin heptaacetate (5)**

[COSY, 600 MHz, D<sub>2</sub>O]

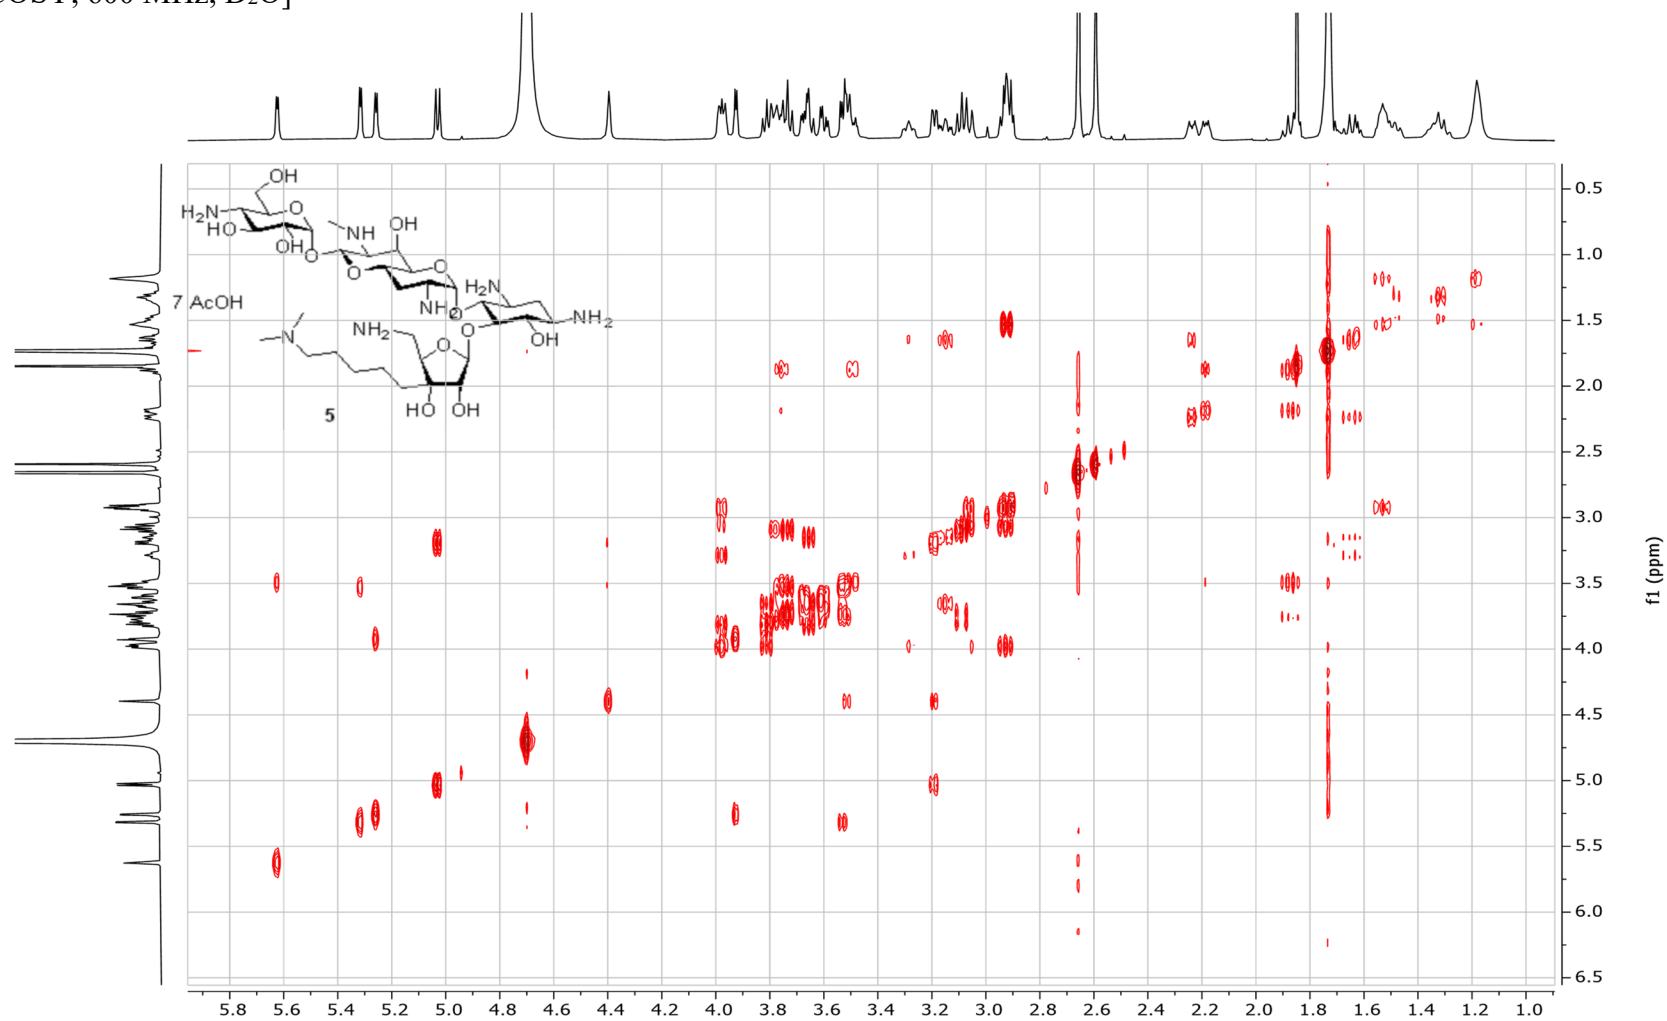

**5-*O*-[5'''-Amino-5'''-deoxy-3-*C*-(5-(dimethylamino)pentyl)- $\beta$ -D-ribofuranosyl]-apramycin heptaacetate (5)**

[NOESY, 600 MHz, D<sub>2</sub>O]

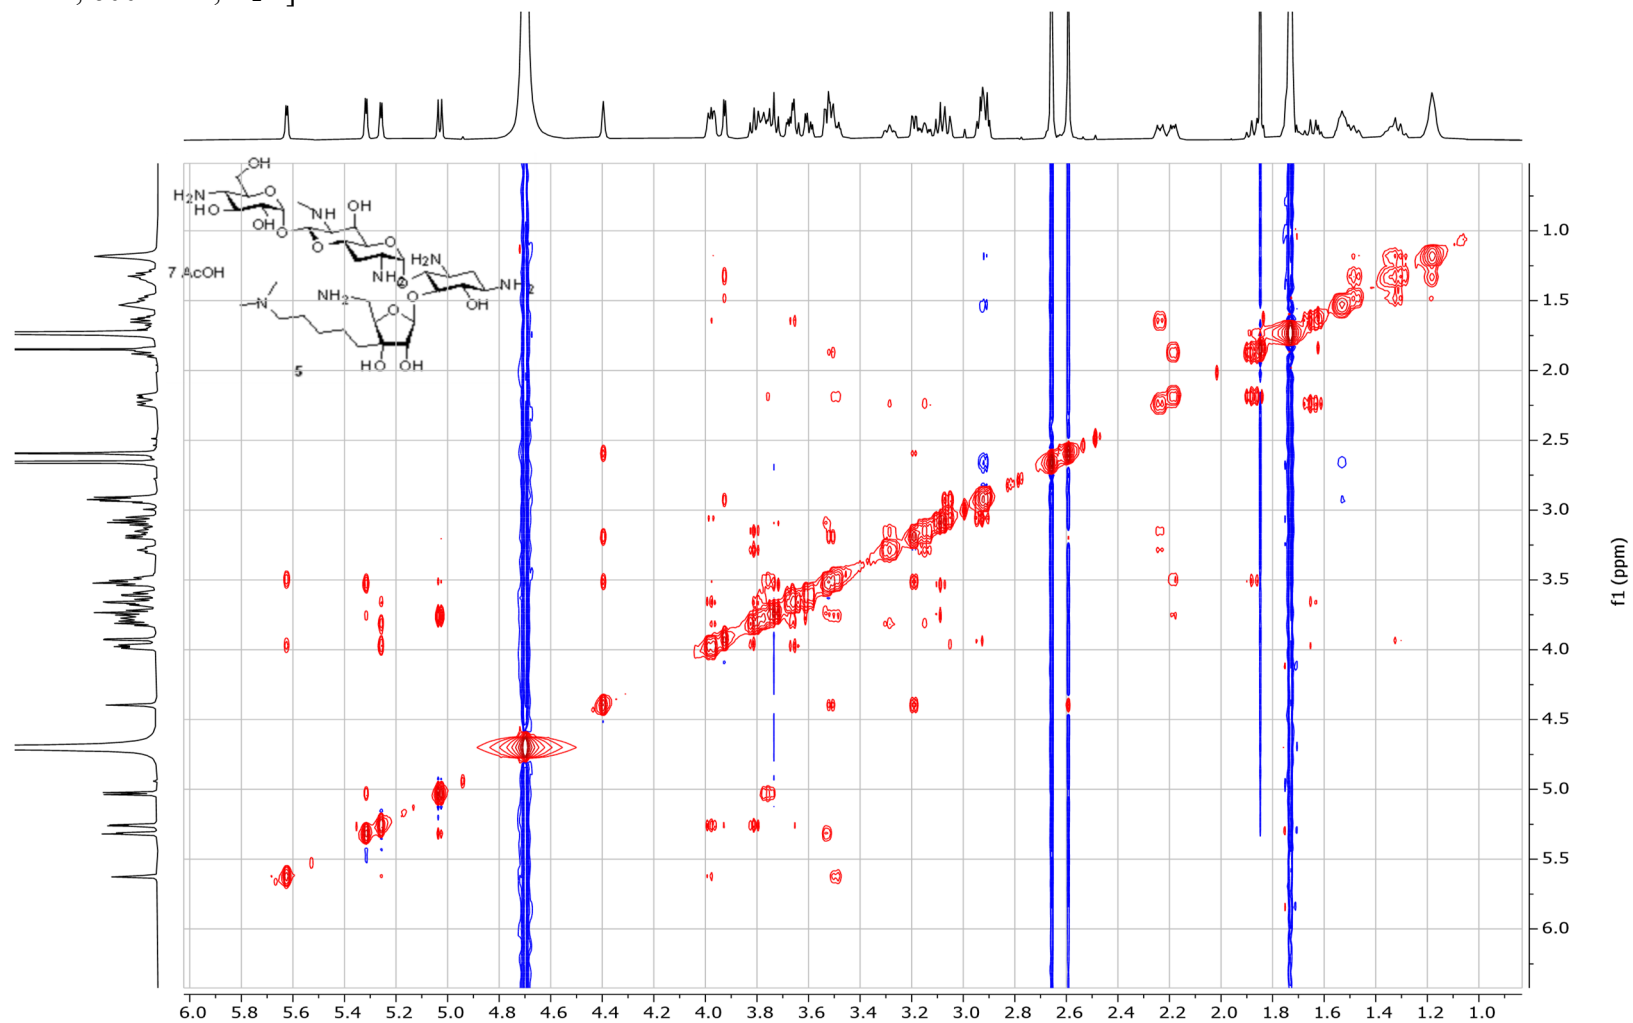

**5-*O*-[5'''-Amino-5'''-deoxy-3-*C*-(5-(dimethylamino)pentyl)- $\alpha$ -D-ribofuranosyl]-apramycin hexaacetate (6)**

[<sup>1</sup>H NMR, 600 MHz, D<sub>2</sub>O]

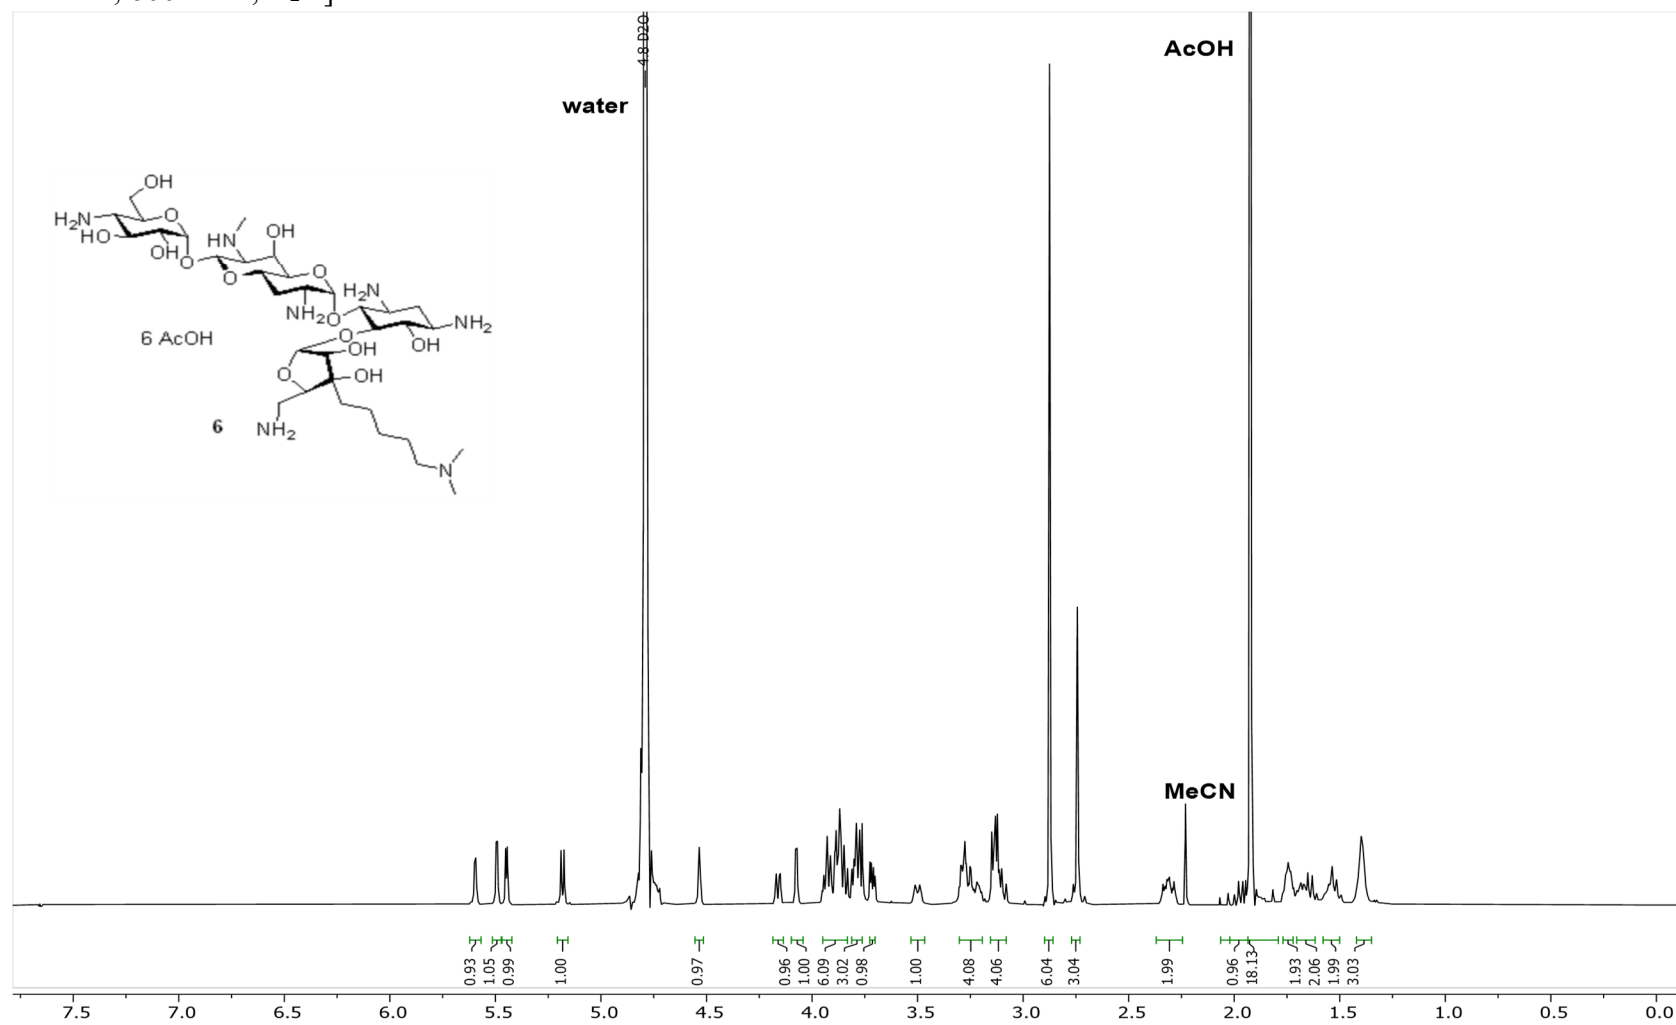

**5-*O*-[5'''-Amino-5'''-deoxy-3-*C*-(5-(dimethylamino)pentyl)- $\alpha$ -D-ribofuranosyl]-apramycin hexaacetate (6)**

[<sup>13</sup>C NMR, 125 MHz, D<sub>2</sub>O]

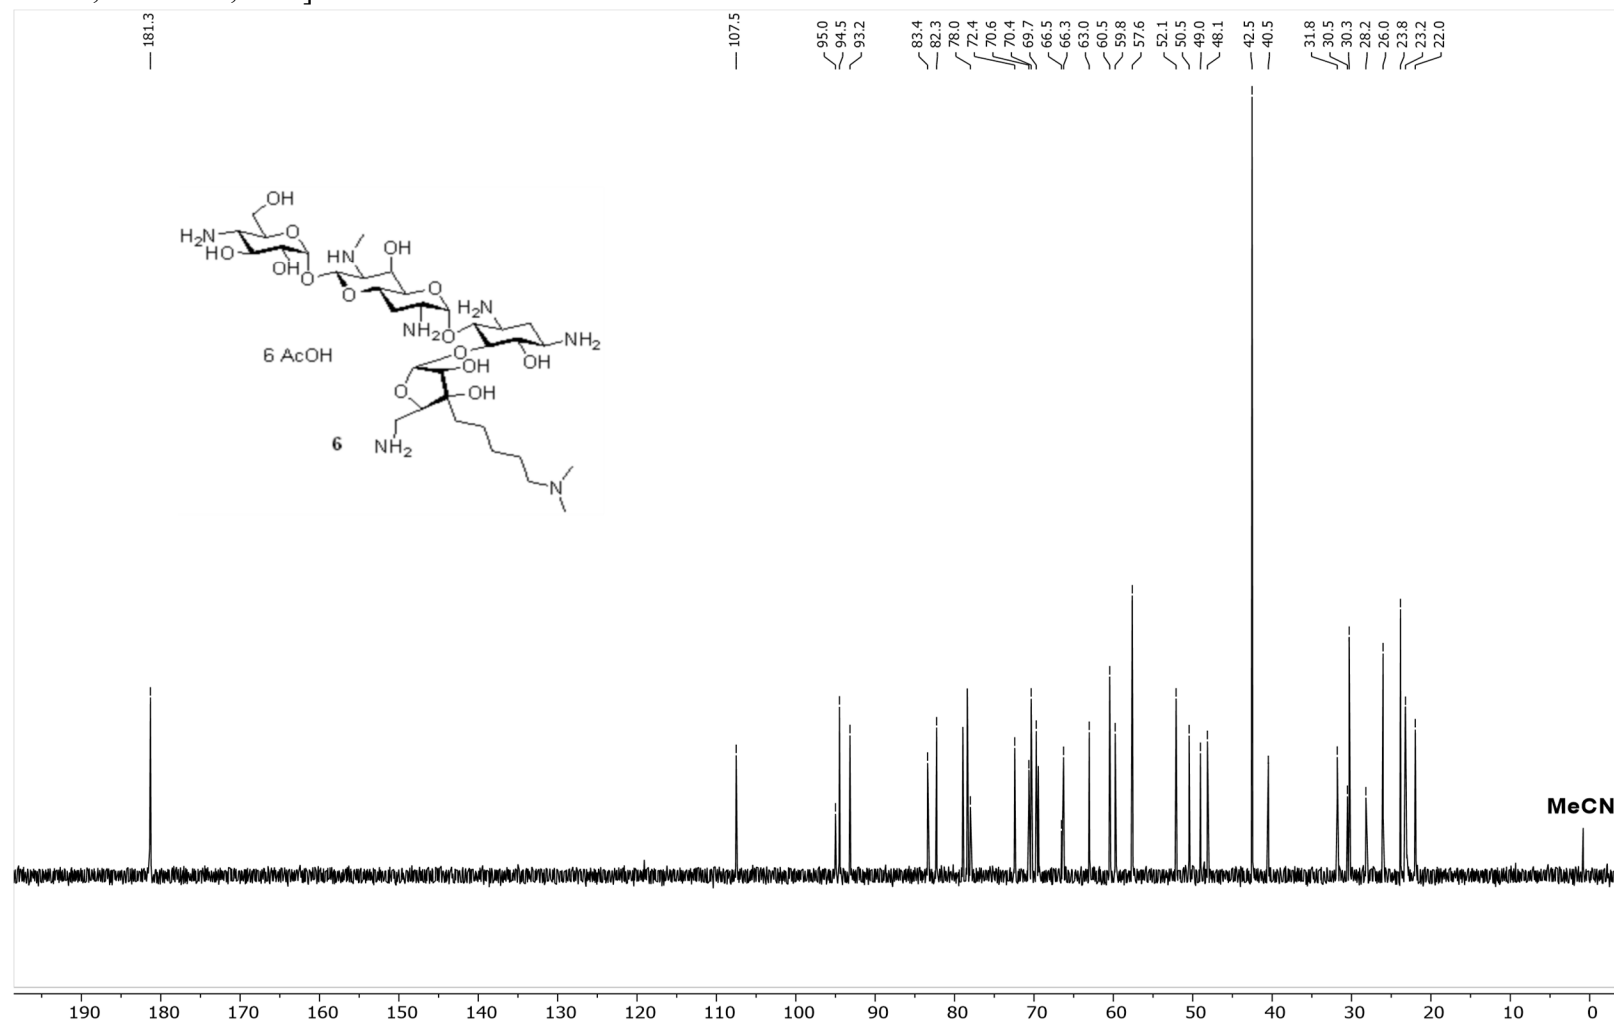

**5-*O*-[5'''-Amino-5'''-deoxy-3-*C*-(5-(dimethylamino)pentyl)- $\alpha$ -D-ribofuranosyl]-apramycin hexaacetate (6)**

[HSQC, 600 MHz, D<sub>2</sub>O]

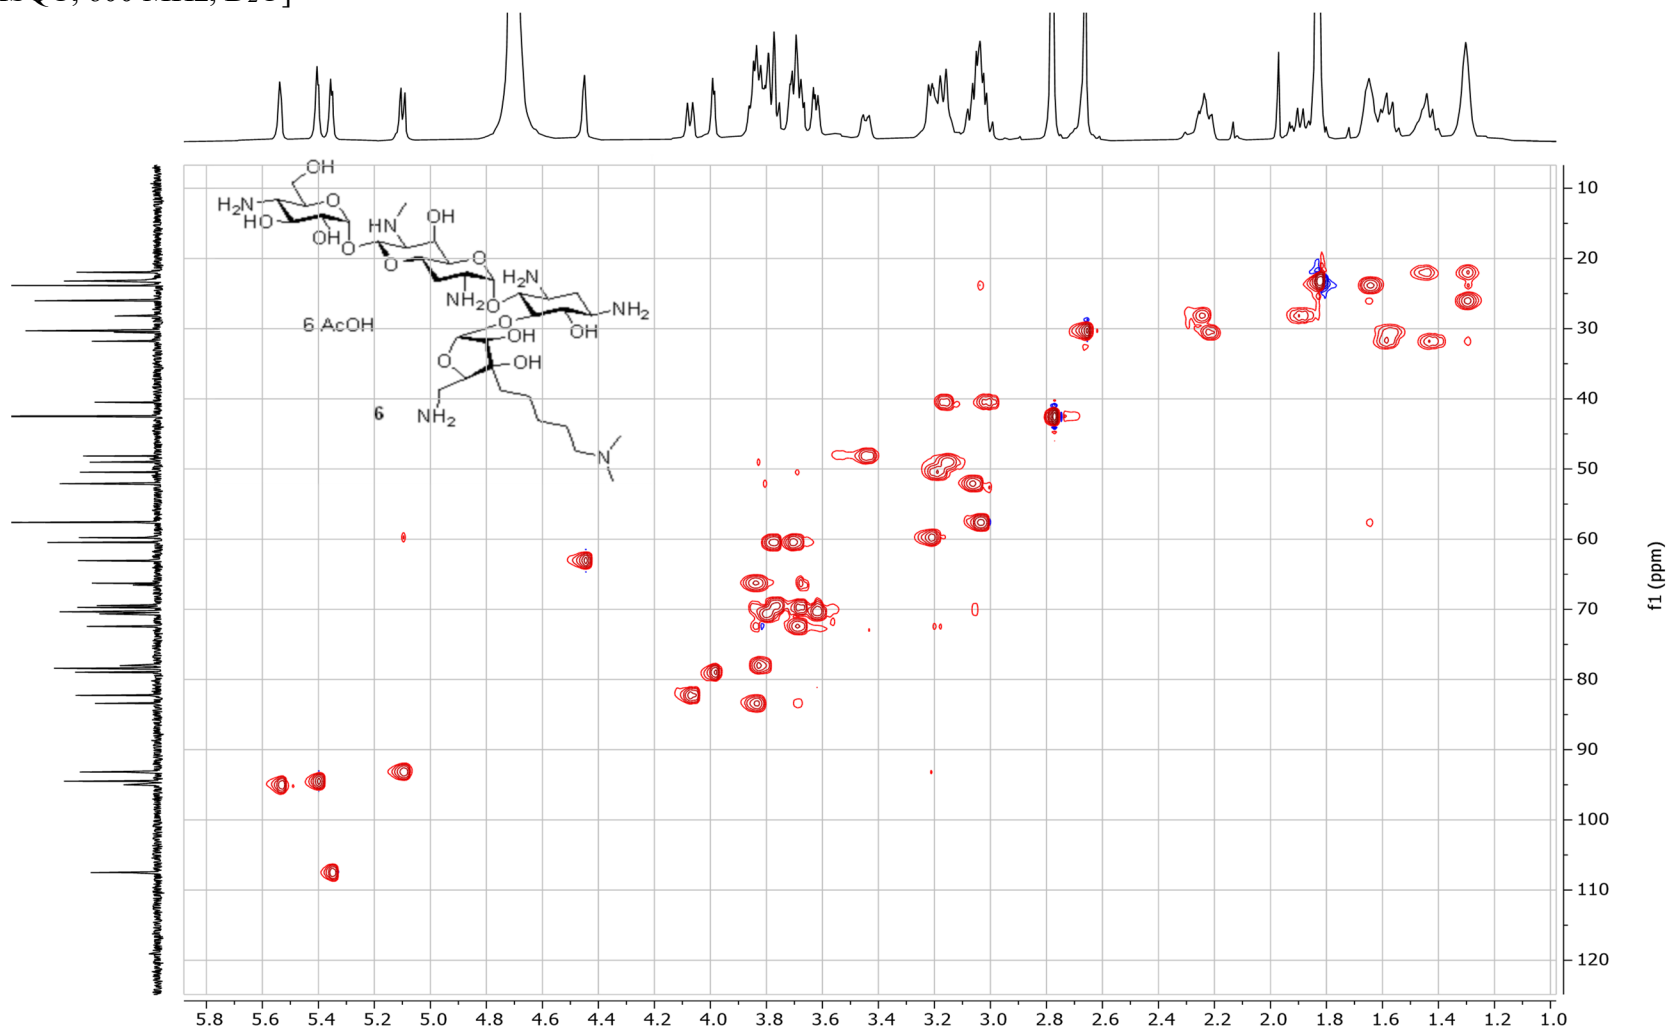

**5-*O*-[5'''-Amino-5'''-deoxy-3-*C*-(5-(dimethylamino)pentyl)- $\alpha$ -D-ribofuranosyl]-apramycin hexaacetate (6)**

[HMBC, 600 MHz, D<sub>2</sub>O]

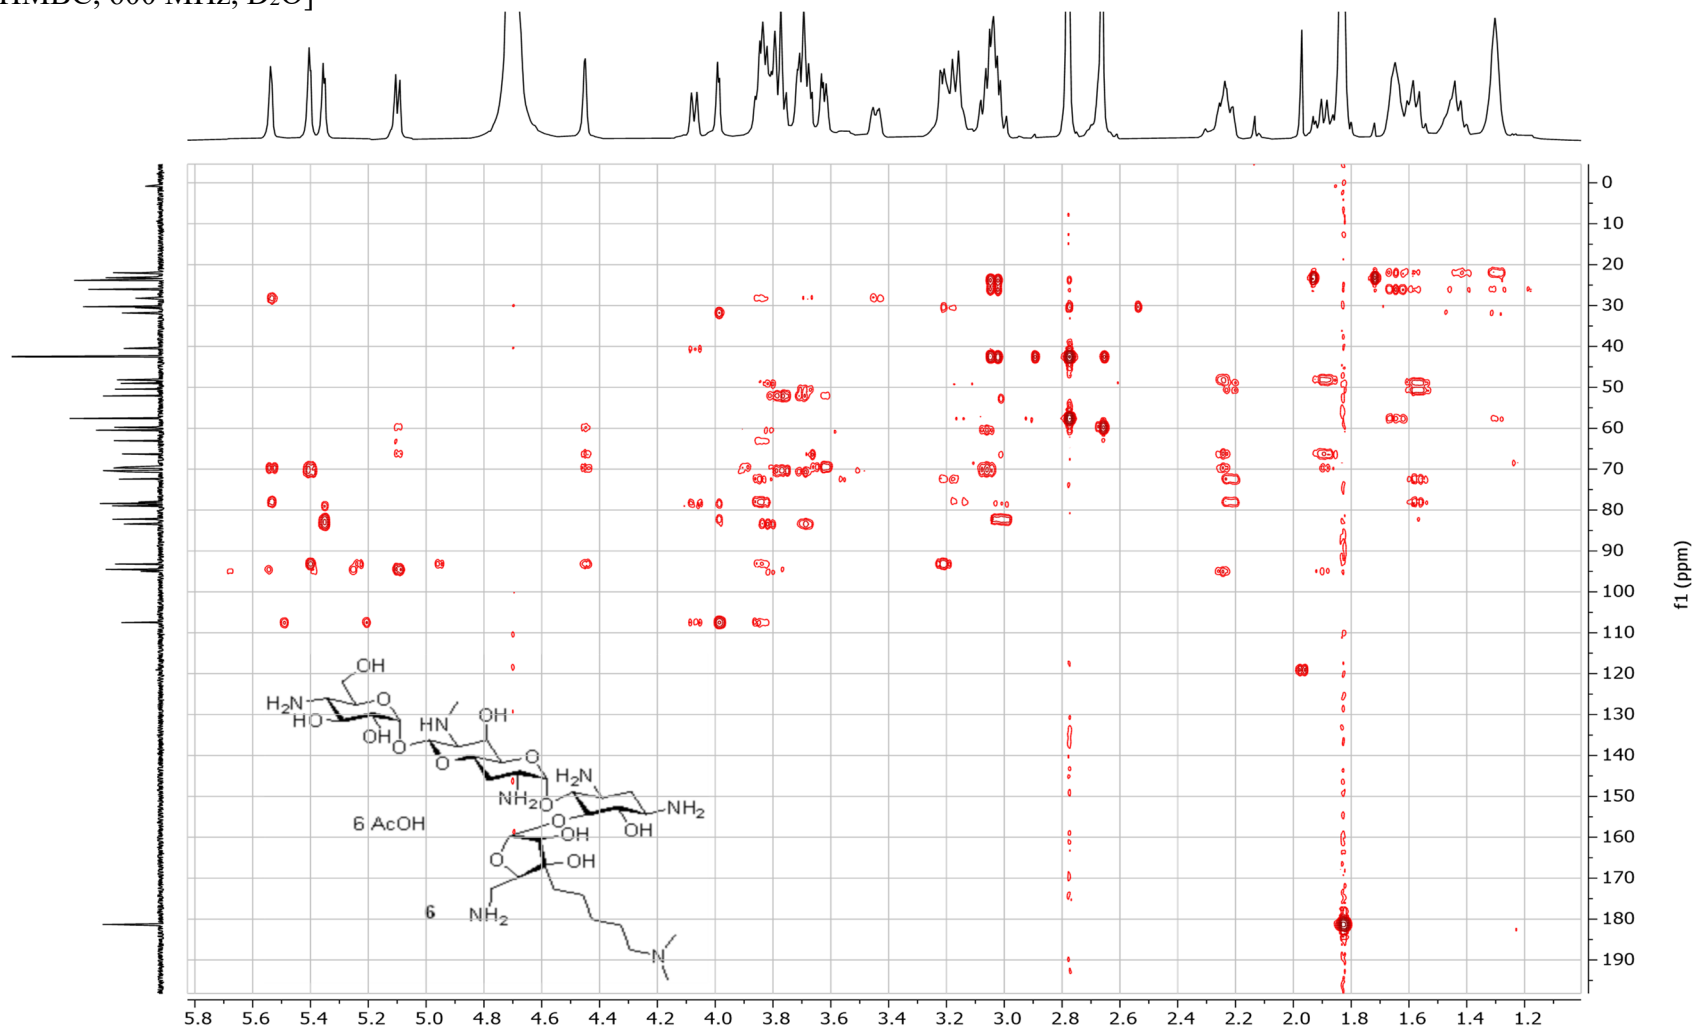



**5-*O*-[5'''-Amino-5'''-deoxy-3-*C*-(5-(dimethylamino)pentyl)- $\alpha$ -D-ribofuranosyl]-apramycin hexaacetate (6)**

[COSY, 600 MHz, D<sub>2</sub>O]

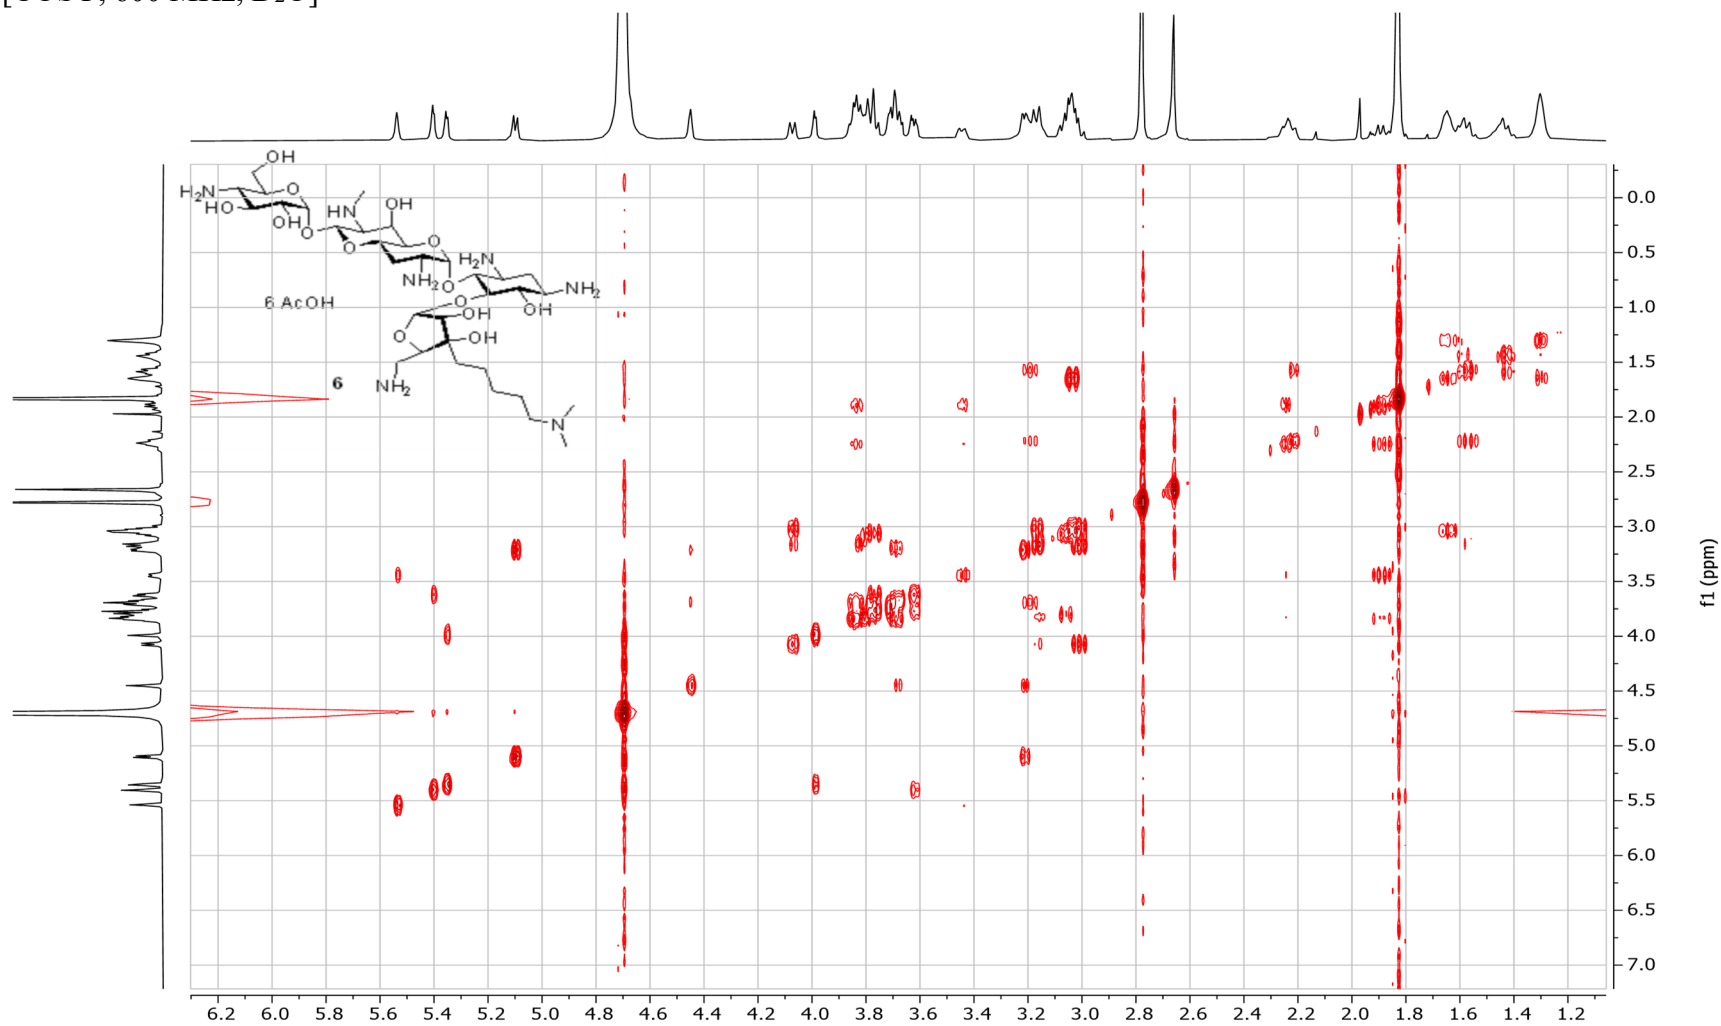

**5-*O*-[5'''-Amino-5'''-deoxy-3-*C*-(5-(dimethylamino)pentyl)- $\alpha$ -D-ribofuranosyl]-apramycin hexaacetate (6)**  
 [NOESY, 600 MHz, D<sub>2</sub>O]

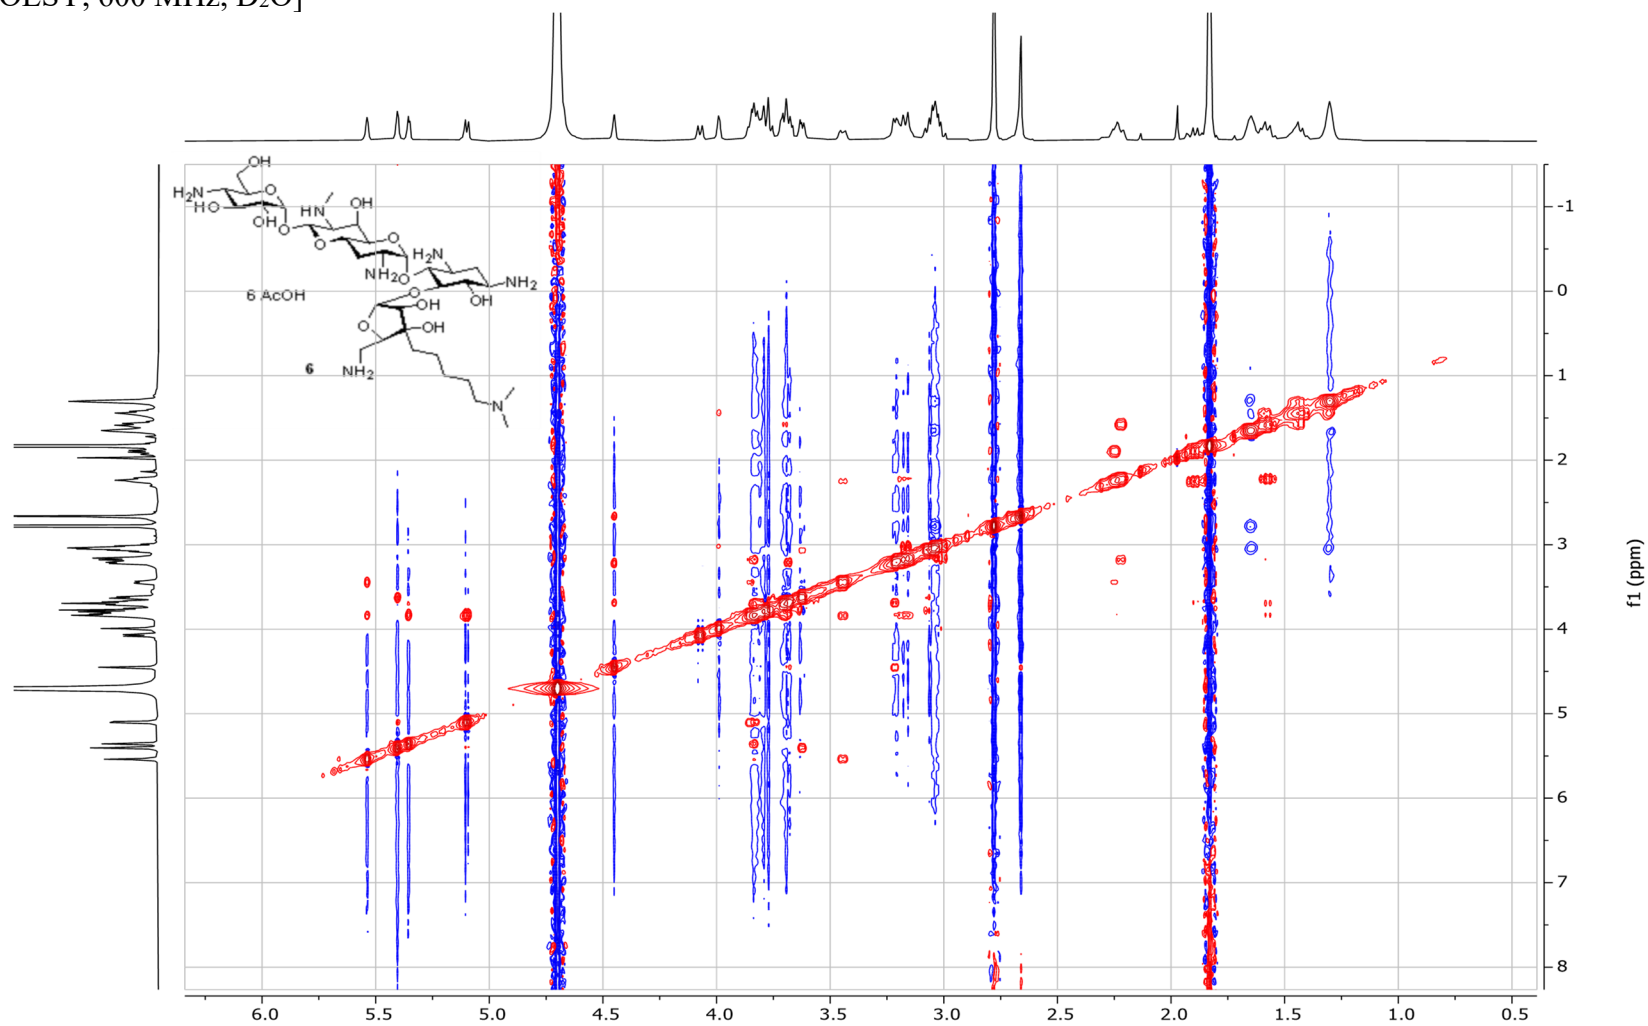

Supplement: s1 [file s1]
